# Supplementary material
Source: MDPI journal article supplement (https://www.mdpi.com/2410-3888/2/2/6)
Supplement: s1 [file s1]

## Sheet: Presence-absence data (Fig. 1)
reference	gear	longitude	latitude	B. belizanus presence	B. belizanus abundance
TBF1994022115	21.3-m seine	-82.3758	27.8533	present	1
TBF1994112108	21.3-m seine	-82.3758	27.8533	present	1
TBF1995071709	21.3-m seine	-82.3758	27.8533	present	1
TBF1995071714	21.3-m seine	-82.3758	27.8533	present	1
TBF1995091907	21.3-m seine	-82.3758	27.8533	present	1
TBF1995112010	21.3-m seine	-82.3758	27.8533	present	1
TBF1995122010	21.3-m seine	-82.3758	27.8533	present	1
TBF1995122011	21.3-m seine	-82.3758	27.8533	present	1
TBF1996012404	21.3-m seine	-82.3758	27.8533	present	1
TBF1996012406	21.3-m seine	-82.3758	27.8533	present	1
TBF1996092003	21.3-m seine	-82.3678	27.8535	present	1
TBF1996092004	21.3-m seine	-82.3675	27.8553	present	3
TBF1996101001	21.3-m seine	-82.3758	27.8533	present	1
TBF1996101003	21.3-m seine	-82.3758	27.8533	present	1
TBM1995102308	21.3-m seine	-82.3588	27.8543	present	4
TBM1996091915	21.3-m seine	-82.359	27.8548	present	5
TBM1997092209	21.3-m seine	-82.3737	27.8563	present	1
TBM1997100905	21.3-m seine	-82.3595	27.8555	present	2
TBM1997112015	21.3-m seine	-82.362	27.8552	present	2
TBM1998031002	21.3-m seine	-82.3505	27.8575	present	6
TBM1998081109	21.3-m seine	-82.3693	27.8563	present	1
TBM1998091003	21.3-m seine	-82.339	27.8622	present	2
TBM1998100811	21.3-m seine	-82.3487	27.8557	present	2
TBM1998100812	21.3-m seine	-82.3623	27.8533	present	3
TBM1998100814	21.3-m seine	-82.3608	27.8572	present	3
TBM1998101316	21.3-m seine	-82.4387	27.718	present	1
TBM1998110904	21.3-m seine	-82.3967	27.8533	present	1
TBM1998111015	21.3-m seine	-82.3144	27.8674	present	1
TBM1998111905	21.3-m seine	-82.4609	27.7067	present	1
TBM1999081004	21.3-m seine	-82.3127	27.8643	present	1
TBM1999081203	21.3-m seine	-82.4455	27.7158	present	11
TBM1999091411	21.3-m seine	-82.434	27.6725	present	6
TBM1999101411	21.3-m seine	-82.437	27.6675	present	1
TBM1999111217	21.3-m seine	-82.428	27.6695	present	2
TBM1999111218	21.3-m seine	-82.4382	27.668	present	2
TBM1999111219	21.3-m seine	-82.4377	27.6878	present	1
TBM2000101006	21.3-m seine	-82.4387	27.687	present	1
TBM2000101008	21.3-m seine	-82.423	27.67	present	4
TBM2001074105	21.3-m seine	-82.3132	27.8681	present	1
TBM2001080712	21.3-m seine	-82.4488	27.6862	present	1
TBM2001091002	21.3-m seine	-82.4317	27.6782	present	1
TBM2001100410	21.3-m seine	-82.4498	27.6872	present	1
TBM2001102102	21.3-m seine	-82.3386	27.8636	present	1
TBM2001102208	180-m seine	-82.3418	27.8632	present	1
TBM2002011214	21.3-m seine	-82.4314	27.667	present	13
TBM2002012203	180-m seine	-82.3422	27.8632	present	1
TBM2002050701	21.3-m seine	-82.4544	27.7136	present	4
TBM2002064305	21.3-m seine	-82.3132	27.8699	present	1
TBM2002074202	21.3-m seine	-82.328	27.8679	present	1
TBM2002084201	21.3-m seine	-82.3242	27.8687	present	1
TBM2002094411	21.3-m seine	-82.358	27.8584	present	4
TBM2002104105	21.3-m seine	-82.3448	27.8578	present	1
TBM2002111503	21.3-m seine	-82.4296	27.6656	present	3
TBM2002114206	21.3-m seine	-82.3132	27.8663	present	1
TBM2002120610	21.3-m seine	-82.4337	27.6782	present	2
TBM2002120611	21.3-m seine	-82.4332	27.6658	present	1
TBM2002120612	21.3-m seine	-82.4232	27.6705	present	10
TBM2002123215	180-m seine	-82.3366	27.8641	present	2
TBM2003010810	21.3-m seine	-82.4311	27.6658	present	5
TBM2003010811	21.3-m seine	-82.4344	27.6859	present	1
TBM2003013101	180-m seine	-82.3872	27.8599	present	1
TBM2003021004	21.3-m seine	-82.4337	27.6661	present	2
TBM2003053111	21.3-m seine	-82.3612	27.8542	present	2
TBM2003090611	21.3-m seine	-82.4512	27.7148	present	3
TBM2003103106	21.3-m seine	-82.3569	27.8567	present	1
TBM2004084104	21.3-m seine	-82.372	27.8591	present	3
TBM2004090406	21.3-m seine	-82.4712	27.7136	present	1
TBM2004094303	21.3-m seine	-82.3615	27.8582	present	1
TBM2004094304	21.3-m seine	-82.3614	27.8582	present	1
TBM2004114502	21.3-m seine	-82.3203	27.8677	present	1
TBM2004114603	21.3-m seine	-82.3747	27.8564	present	1
TBM2004121112	21.3-m seine	-82.4383	27.7166	present	1
TBM2004121113	21.3-m seine	-82.4381	27.7167	present	2
TBM2004121114	21.3-m seine	-82.4513	27.7144	present	3
TBM2004124504	21.3-m seine	-82.3098	27.8724	present	1
TBM2005024305	21.3-m seine	-82.3205	27.8677	present	1
TBM2005043107	21.3-m seine	-82.3573	27.8566	present	1
TBM2005060907	21.3-m seine	-82.4315	27.6833	present	1
TBM2005074201	21.3-m seine	-82.3927	27.8542	present	1
TBM2005074210	21.3-m seine	-82.3792	27.8559	present	2
TBM2005080907	21.3-m seine	-82.458	27.694	present	1
TBM2005091205	21.3-m seine	-82.4475	27.6879	present	3
TBM2005091208	21.3-m seine	-82.4563	27.7132	present	2
TBM2005093106	21.3-m seine	-82.3778	27.8551	present	5
TBM2005101203	21.3-m seine	-82.4255	27.67	present	1
TBM2005110302	21.3-m seine	-82.4566	27.7033	present	3
TBM2005123112	21.3-m seine	-82.3785	27.8553	present	2
TBM2006011610	9.1-m seine	-82.4271	27.665	present	1
TBM2006011709	9.1-m seine	-82.4465	27.6781	present	1
TBM2006011805	9.1-m seine	-82.3483	27.8589	present	1
TBM2006011808	9.1-m seine	-82.3479	27.8602	present	1
TBM2006011902	9.1-m seine	-82.3086	27.8734	present	1
TBM2006021701	9.1-m seine	-82.4311	27.6657	present	1
TBM2006030111	21.3-m seine	-82.4327	27.6792	present	6
TBM2006032306	9.1-m seine	-82.443	27.6793	present	1
TBM2006032612	9.1-m seine	-82.3218	27.8653	present	2
TBM2006034507	21.3-m seine	-82.3099	27.873	present	1
TBM2006042414	9.1-m seine	-82.4465	27.6781	present	2
TBM2006042512	9.1-m seine	-82.3476	27.8597	present	1
TBM2006042603	9.1-m seine	-82.309	27.8733	present	1
TBM2006062608	9.1-m seine	-82.4442	27.6789	present	1
TBM2006062704	9.1-m seine	-82.4262	27.6627	present	1
TBM2006064201	21.3-m seine	-82.3808	27.8571	present	1
TBM2006072511	9.1-m seine	-82.3211	27.8666	present	1
TBM2006074505	21.3-m seine	-82.3487	27.8581	present	2
TBM2006082311	9.1-m seine	-82.3484	27.8602	present	2
TBM2006082409	9.1-m seine	-82.3093	27.8729	present	1
TBM2006090109	21.3-m seine	-82.4467	27.7167	present	1
TBM2006092210	9.1-m seine	-82.445	27.6787	present	2
TBM2006092211	9.1-m seine	-82.4433	27.6796	present	2
TBM2006092313	9.1-m seine	-82.4257	27.6622	present	1
TBM2006092404	9.1-m seine	-82.3493	27.8598	present	1
TBM2006092507	9.1-m seine	-82.313	27.8648	present	1
TBM2006094508	21.3-m seine	-82.3479	27.856	present	1
TBM2006100204	21.3-m seine	-82.4316	27.6834	present	1
TBM2006100209	21.3-m seine	-82.4535	27.7182	present	4
TBM2006102001	9.1-m seine	-82.4487	27.6803	present	1
TBM2006102003	9.1-m seine	-82.4471	27.6783	present	1
TBM2006102004	9.1-m seine	-82.4469	27.6782	present	1
TBM2006102006	9.1-m seine	-82.4448	27.6787	present	1
TBM2006102007	9.1-m seine	-82.4425	27.6789	present	1
TBM2006102008	9.1-m seine	-82.4418	27.6792	present	1
TBM2006102009	9.1-m seine	-82.4408	27.6794	present	2
TBM2006102010	9.1-m seine	-82.4402	27.6798	present	2
TBM2006102011	9.1-m seine	-82.4369	27.682	present	1
TBM2006102012	9.1-m seine	-82.4364	27.683	present	1
TBM2006102014	9.1-m seine	-82.4422	27.6818	present	1
TBM2006102105	9.1-m seine	-82.4258	27.6629	present	1
TBM2006102109	9.1-m seine	-82.4269	27.6641	present	5
TBM2006102112	9.1-m seine	-82.4307	27.6668	present	1
TBM2006102114	9.1-m seine	-82.4284	27.6678	present	1
TBM2006102203	9.1-m seine	-82.3479	27.86	present	2
TBM2006103115	21.3-m seine	-82.3744	27.8546	present	8
TBM2006104102	21.3-m seine	-82.3308	27.866	present	1
TBM2006104104	21.3-m seine	-82.3131	27.8667	present	2
TBM2006104304	21.3-m seine	-82.3596	27.8579	present	1
TBM2006110504	21.3-m seine	-82.459	27.7059	present	1
TBM2006110507	21.3-m seine	-82.4514	27.7093	present	2
TBM2006110508	21.3-m seine	-82.4489	27.6905	present	1
TBM2006110509	21.3-m seine	-82.4369	27.6864	present	1
TBM2006112213	9.1-m seine	-82.3217	27.8656	present	1
TBM2006112502	9.1-m seine	-82.4414	27.6793	present	1
TBM2006112507	9.1-m seine	-82.4472	27.6784	present	1
TBM2006112601	9.1-m seine	-82.4318	27.6657	present	2
TBM2006112603	9.1-m seine	-82.4295	27.6674	present	1
TBM2006112605	9.1-m seine	-82.4299	27.6668	present	1
TBM2006113112	21.3-m seine	-82.3764	27.8615	present	1
TBM2006114604	21.3-m seine	-82.308	27.8844	present	1
TBM2006120111	21.3-m seine	-82.4367	27.6865	present	1
TBM2006122011	9.1-m seine	-82.4464	27.6782	present	1
TBM2006123104	21.3-m seine	-82.351	27.8558	present	9
TBM2007010709	21.3-m seine	-82.4424	27.6894	present	1
TBM2007012212	9.1-m seine	-82.4938	27.6815	present	2
TBM2007012215	9.1-m seine	-82.4921	27.6822	present	4
TBM2007020803	21.3-m seine	-82.4318	27.6668	present	1
TBM2007022212	9.1-m seine	-82.4956	27.6811	present	2
TBM2007031101	21.3-m seine	-82.4484	27.7168	present	1
TBM2007032002	9.1-m seine	-82.4947	27.6812	present	1
TBM2007032003	9.1-m seine	-82.4937	27.6815	present	1
TBM2007032005	9.1-m seine	-82.4924	27.682	present	1
TBM2007040704	21.3-m seine	-82.4391	27.6716	present	1
TBM2007042103	9.1-m seine	-82.5094	27.6731	present	1
TBM2007052302	9.1-m seine	-82.6392	27.752	present	1
TBM2007052524	9.1-m seine	-82.4421	27.7473	present	1
TBM2007052715	9.1-m seine	-82.3885	27.8844	present	1
TBM2007052820	9.1-m seine	-82.3971	27.8899	present	1
TBM2007064303	21.3-m seine	-82.3141	27.8687	present	1
TBM2007072208	9.1-m seine	-82.5073	27.6713	present	1
TBM2007080704	21.3-m seine	-82.4577	27.7033	present	1
TBM2007082302	9.1-m seine	-82.4486	27.6805	present	1
TBM2007082303	9.1-m seine	-82.4483	27.6798	present	1
TBM2007082305	9.1-m seine	-82.4462	27.6782	present	1
TBM2007082307	9.1-m seine	-82.4443	27.6788	present	5
TBM2007082309	9.1-m seine	-82.4427	27.6789	present	1
TBM2007092107	9.1-m seine	-82.443	27.6793	present	1
TBM2007092108	9.1-m seine	-82.4431	27.6793	present	1
TBM2007092110	9.1-m seine	-82.4459	27.6784	present	1
TBM2007092112	9.1-m seine	-82.4472	27.6789	present	1
TBM2007092113	9.1-m seine	-82.4471	27.6793	present	1
TBM2007092114	9.1-m seine	-82.4482	27.6801	present	1
TBM2007092304	9.1-m seine	-82.5091	27.6729	present	1
TBM2007092305	9.1-m seine	-82.5084	27.6728	present	6
TBM2007092306	9.1-m seine	-82.5077	27.6721	present	2
TBM2007092307	9.1-m seine	-82.5074	27.6722	present	1
TBM2007092308	9.1-m seine	-82.5071	27.6711	present	3
TBM2007092309	9.1-m seine	-82.5069	27.6708	present	2
TBM2007092401	9.1-m seine	-82.4008	27.7813	present	4
TBM2007092402	9.1-m seine	-82.4008	27.7813	present	1
TBM2007092408	9.1-m seine	-82.4421	27.7473	present	1
TBM2007092409	9.1-m seine	-82.4421	27.7473	present	2
TBM2007092411	9.1-m seine	-82.4421	27.7473	present	1
TBM2007092412	9.1-m seine	-82.4421	27.7473	present	2
TBM2007092413	9.1-m seine	-82.4319	27.7188	present	1
TBM2007092602	9.1-m seine	-82.6392	27.752	present	3
TBM2007092605	9.1-m seine	-82.6392	27.752	present	2
TBM2007092606	9.1-m seine	-82.6392	27.752	present	1
TBM2007092707	9.1-m seine	-82.397	27.8901	present	1
TBM2007092709	9.1-m seine	-82.397	27.8901	present	1
TBM2007092712	9.1-m seine	-82.397	27.8901	present	1
TBM2007102308	9.1-m seine	-82.5071	27.6709	present	1
TBM2007102403	9.1-m seine	-82.382	27.8376	present	2
TBM2007102405	9.1-m seine	-82.382	27.8376	present	1
TBM2007111011	21.3-m seine	-82.4632	27.7083	present	1
TBM2007112112	9.1-m seine	-82.447	27.6792	present	1
TBM2007114506	21.3-m seine	-82.31	27.8733	present	3
TBM2007120913	21.3-m seine	-82.4321	27.6657	present	1
TBM2007122108	9.1-m seine	-82.4474	27.6783	present	2
TBM2007122113	9.1-m seine	-82.4404	27.6796	present	1
TBM2007122201	9.1-m seine	-82.4953	27.6811	present	1
TBM2007122202	9.1-m seine	-82.4952	27.6812	present	1
TBM2007122206	9.1-m seine	-82.4914	27.6822	present	1
TBM2007122208	9.1-m seine	-82.5098	27.6735	present	1
TBM2007122210	9.1-m seine	-82.5073	27.6714	present	1
TBM2007122211	9.1-m seine	-82.5068	27.6707	present	4
TBM2007122213	9.1-m seine	-82.5073	27.6713	present	1
TBM2007122215	9.1-m seine	-82.5092	27.6729	present	1
TBX2007100204	9.1-m seine	-82.4567	27.6917	present	1
TBX2007120102	9.1-m seine	-82.4579	27.6928	present	1
TBX2007120104	9.1-m seine	-82.4583	27.6927	present	1
TBX2008060101	9.1-m seine	-82.6397	27.7593	present	5
TBX2008100102	9.1-m seine	-82.5477	27.6448	present	2
TBF1989011201	21.3-m seine	-82.3758	27.8533	absent
TBF1989011202	21.3-m seine	-82.3758	27.8533	absent
TBF1989011203	21.3-m seine	-82.3758	27.8533	absent
TBF1989011204	21.3-m seine	-82.3758	27.8533	absent
TBF1989011205	21.3-m seine	-82.3758	27.8533	absent
TBF1989011206	21.3-m seine	-82.3758	27.8533	absent
TBF1989011207	21.3-m seine	-82.3758	27.8533	absent
TBF1989011208	21.3-m seine	-82.3758	27.8533	absent
TBF1989011209	21.3-m seine	-82.3913	27.8595	absent
TBF1989011210	21.3-m seine	-82.3913	27.8595	absent
TBF1989011301	21.3-m seine	-82.4518	27.6908	absent
TBF1989011302	21.3-m seine	-82.4262	27.6688	absent
TBF1989011303	21.3-m seine	-82.4518	27.6908	absent
TBF1989011304	21.3-m seine	-82.4518	27.6908	absent
TBF1989011305	21.3-m seine	-82.4518	27.6908	absent
TBF1989011306	21.3-m seine	-82.4262	27.6688	absent
TBF1989011307	21.3-m seine	-82.4518	27.6908	absent
TBF1989011308	21.3-m seine	-82.4518	27.6908	absent
TBF1989011309	21.3-m seine	-82.4262	27.6688	absent
TBF1989011310	21.3-m seine	-82.4262	27.6688	absent
TBF1989011311	21.3-m seine	-82.4262	27.6688	absent
TBF1989011312	21.3-m seine	-82.4262	27.6688	absent
TBF1989012401	21.3-m seine	-82.4518	27.6908	absent
TBF1989012402	21.3-m seine	-82.4518	27.6908	absent
TBF1989012403	21.3-m seine	-82.4518	27.6908	absent
TBF1989012404	21.3-m seine	-82.4518	27.6908	absent
TBF1989012405	21.3-m seine	-82.4518	27.6908	absent
TBF1989012406	21.3-m seine	-82.4518	27.6908	absent
TBF1989012601	21.3-m seine	-82.3758	27.8533	absent
TBF1989012602	21.3-m seine	-82.3758	27.8533	absent
TBF1989012603	21.3-m seine	-82.3758	27.8533	absent
TBF1989012604	21.3-m seine	-82.3758	27.8533	absent
TBF1989012605	21.3-m seine	-82.3758	27.8533	absent
TBF1989012606	21.3-m seine	-82.3758	27.8533	absent
TBF1989012607	21.3-m seine	-82.3758	27.8533	absent
TBF1989012608	21.3-m seine	-82.3758	27.8533	absent
TBF1989012609	21.3-m seine	-82.3913	27.8595	absent
TBF1989012610	21.3-m seine	-82.3913	27.8595	absent
TBF1989020901	21.3-m seine	-82.4262	27.6688	absent
TBF1989020902	21.3-m seine	-82.4262	27.6688	absent
TBF1989020903	21.3-m seine	-82.4262	27.6688	absent
TBF1989020904	21.3-m seine	-82.4518	27.6908	absent
TBF1989020905	21.3-m seine	-82.4518	27.6908	absent
TBF1989020906	21.3-m seine	-82.4518	27.6908	absent
TBF1989020907	21.3-m seine	-82.4518	27.6908	absent
TBF1989020908	21.3-m seine	-82.4518	27.6908	absent
TBF1989020909	21.3-m seine	-82.4518	27.6908	absent
TBF1989022101	21.3-m seine	-82.3913	27.8595	absent
TBF1989022102	21.3-m seine	-82.3913	27.8595	absent
TBF1989022103	21.3-m seine	-82.3758	27.8533	absent
TBF1989022104	21.3-m seine	-82.3758	27.8533	absent
TBF1989022105	21.3-m seine	-82.3758	27.8533	absent
TBF1989022106	21.3-m seine	-82.3758	27.8533	absent
TBF1989022107	21.3-m seine	-82.3758	27.8533	absent
TBF1989022108	21.3-m seine	-82.3758	27.8533	absent
TBF1989022109	21.3-m seine	-82.3758	27.8533	absent
TBF1989022110	21.3-m seine	-82.3758	27.8533	absent
TBF1989022301	21.3-m seine	-82.4262	27.6688	absent
TBF1989022302	21.3-m seine	-82.4262	27.6688	absent
TBF1989022303	21.3-m seine	-82.4262	27.6688	absent
TBF1989022304	21.3-m seine	-82.4518	27.6908	absent
TBF1989022305	21.3-m seine	-82.4518	27.6908	absent
TBF1989022306	21.3-m seine	-82.4518	27.6908	absent
TBF1989022307	21.3-m seine	-82.4518	27.6908	absent
TBF1989022308	21.3-m seine	-82.4518	27.6908	absent
TBF1989022309	21.3-m seine	-82.4518	27.6908	absent
TBF1989030601	21.3-m seine	-82.3913	27.8595	absent
TBF1989030602	21.3-m seine	-82.3913	27.8595	absent
TBF1989030904	21.3-m seine	-82.4262	27.6688	absent
TBF1989030905	21.3-m seine	-82.4262	27.6688	absent
TBF1989030906	21.3-m seine	-82.4262	27.6688	absent
TBF1989030910	21.3-m seine	-82.4518	27.6908	absent
TBF1989030911	21.3-m seine	-82.4518	27.6908	absent
TBF1989030912	21.3-m seine	-82.4518	27.6908	absent
TBF1989030913	21.3-m seine	-82.4518	27.6908	absent
TBF1989030914	21.3-m seine	-82.4518	27.6908	absent
TBF1989030915	21.3-m seine	-82.4518	27.6908	absent
TBF1989031001	21.3-m seine	-82.3758	27.8533	absent
TBF1989031002	21.3-m seine	-82.3758	27.8533	absent
TBF1989031003	21.3-m seine	-82.3758	27.8533	absent
TBF1989031004	21.3-m seine	-82.3758	27.8533	absent
TBF1989031005	21.3-m seine	-82.3758	27.8533	absent
TBF1989031006	21.3-m seine	-82.3758	27.8533	absent
TBF1989031007	21.3-m seine	-82.3758	27.8533	absent
TBF1989032001	21.3-m seine	-82.3913	27.8595	absent
TBF1989032002	21.3-m seine	-82.3913	27.8595	absent
TBF1989032003	21.3-m seine	-82.3758	27.8533	absent
TBF1989032004	21.3-m seine	-82.3758	27.8533	absent
TBF1989032005	21.3-m seine	-82.3758	27.8533	absent
TBF1989032006	21.3-m seine	-82.3758	27.8533	absent
TBF1989032007	21.3-m seine	-82.3758	27.8533	absent
TBF1989032008	21.3-m seine	-82.3758	27.8533	absent
TBF1989032009	21.3-m seine	-82.3758	27.8533	absent
TBF1989032010	21.3-m seine	-82.3758	27.8533	absent
TBF1989032301	21.3-m seine	-82.4518	27.6908	absent
TBF1989032302	21.3-m seine	-82.4518	27.6908	absent
TBF1989032303	21.3-m seine	-82.4518	27.6908	absent
TBF1989032304	21.3-m seine	-82.4518	27.6908	absent
TBF1989032305	21.3-m seine	-82.4518	27.6908	absent
TBF1989032306	21.3-m seine	-82.4518	27.6908	absent
TBF1989032307	21.3-m seine	-82.4262	27.6688	absent
TBF1989032308	21.3-m seine	-82.4262	27.6688	absent
TBF1989032309	21.3-m seine	-82.4262	27.6688	absent
TBF1989033001	21.3-m seine	-82.3913	27.8595	absent
TBF1989033002	21.3-m seine	-82.3913	27.8595	absent
TBF1989033003	21.3-m seine	-82.3758	27.8533	absent
TBF1989033004	21.3-m seine	-82.3758	27.8533	absent
TBF1989033005	21.3-m seine	-82.3758	27.8533	absent
TBF1989033006	21.3-m seine	-82.3758	27.8533	absent
TBF1989033007	21.3-m seine	-82.3758	27.8533	absent
TBF1989033008	21.3-m seine	-82.3758	27.8533	absent
TBF1989033009	21.3-m seine	-82.3758	27.8533	absent
TBF1989033010	21.3-m seine	-82.3758	27.8533	absent
TBF1989040601	21.3-m seine	-82.4518	27.6908	absent
TBF1989040602	21.3-m seine	-82.4518	27.6908	absent
TBF1989040603	21.3-m seine	-82.4518	27.6908	absent
TBF1989040604	21.3-m seine	-82.4518	27.6908	absent
TBF1989040605	21.3-m seine	-82.4518	27.6908	absent
TBF1989040606	21.3-m seine	-82.4518	27.6908	absent
TBF1989040607	21.3-m seine	-82.4262	27.6688	absent
TBF1989040608	21.3-m seine	-82.4262	27.6688	absent
TBF1989040609	21.3-m seine	-82.4262	27.6688	absent
TBF1989041401	21.3-m seine	-82.3758	27.8533	absent
TBF1989041402	21.3-m seine	-82.3758	27.8533	absent
TBF1989041403	21.3-m seine	-82.3758	27.8533	absent
TBF1989041404	21.3-m seine	-82.3758	27.8533	absent
TBF1989041405	21.3-m seine	-82.3758	27.8533	absent
TBF1989041406	21.3-m seine	-82.3758	27.8533	absent
TBF1989041407	21.3-m seine	-82.3758	27.8533	absent
TBF1989041408	21.3-m seine	-82.3758	27.8533	absent
TBF1989041409	21.3-m seine	-82.3913	27.8595	absent
TBF1989041410	21.3-m seine	-82.3913	27.8595	absent
TBF1989042001	21.3-m seine	-82.4518	27.6908	absent
TBF1989042002	21.3-m seine	-82.4518	27.6908	absent
TBF1989042003	21.3-m seine	-82.4518	27.6908	absent
TBF1989042004	21.3-m seine	-82.4518	27.6908	absent
TBF1989042005	21.3-m seine	-82.4518	27.6908	absent
TBF1989042006	21.3-m seine	-82.4518	27.6908	absent
TBF1989042007	21.3-m seine	-82.4262	27.6688	absent
TBF1989042008	21.3-m seine	-82.4262	27.6688	absent
TBF1989042009	21.3-m seine	-82.4262	27.6688	absent
TBF1989042801	21.3-m seine	-82.3913	27.8595	absent
TBF1989042802	21.3-m seine	-82.3913	27.8595	absent
TBF1989042803	21.3-m seine	-82.3758	27.8533	absent
TBF1989042804	21.3-m seine	-82.3758	27.8533	absent
TBF1989042805	21.3-m seine	-82.3758	27.8533	absent
TBF1989042806	21.3-m seine	-82.3758	27.8533	absent
TBF1989042807	21.3-m seine	-82.3758	27.8533	absent
TBF1989042808	21.3-m seine	-82.3758	27.8533	absent
TBF1989042809	21.3-m seine	-82.3758	27.8533	absent
TBF1989042810	21.3-m seine	-82.3758	27.8533	absent
TBF1989050501	21.3-m seine	-82.4262	27.6688	absent
TBF1989050502	21.3-m seine	-82.4262	27.6688	absent
TBF1989050503	21.3-m seine	-82.4262	27.6688	absent
TBF1989050504	21.3-m seine	-82.4518	27.6908	absent
TBF1989050505	21.3-m seine	-82.4518	27.6908	absent
TBF1989050506	21.3-m seine	-82.4518	27.6908	absent
TBF1989050507	21.3-m seine	-82.4518	27.6908	absent
TBF1989050508	21.3-m seine	-82.4518	27.6908	absent
TBF1989050509	21.3-m seine	-82.4518	27.6908	absent
TBF1989051201	21.3-m seine	-82.3913	27.8595	absent
TBF1989051202	21.3-m seine	-82.3913	27.8595	absent
TBF1989051203	21.3-m seine	-82.3758	27.8533	absent
TBF1989051204	21.3-m seine	-82.3758	27.8533	absent
TBF1989051205	21.3-m seine	-82.3758	27.8533	absent
TBF1989051206	21.3-m seine	-82.3758	27.8533	absent
TBF1989051207	21.3-m seine	-82.3758	27.8533	absent
TBF1989051208	21.3-m seine	-82.3758	27.8533	absent
TBF1989051209	21.3-m seine	-82.3758	27.8533	absent
TBF1989051210	21.3-m seine	-82.3758	27.8533	absent
TBF1989051901	21.3-m seine	-82.4262	27.6688	absent
TBF1989051902	21.3-m seine	-82.4262	27.6688	absent
TBF1989051903	21.3-m seine	-82.4262	27.6688	absent
TBF1989051904	21.3-m seine	-82.4518	27.6908	absent
TBF1989051905	21.3-m seine	-82.4518	27.6908	absent
TBF1989051906	21.3-m seine	-82.4518	27.6908	absent
TBF1989051907	21.3-m seine	-82.4518	27.6908	absent
TBF1989051908	21.3-m seine	-82.4518	27.6908	absent
TBF1989051909	21.3-m seine	-82.4518	27.6908	absent
TBF1989052601	21.3-m seine	-82.3758	27.8533	absent
TBF1989052602	21.3-m seine	-82.3758	27.8533	absent
TBF1989052603	21.3-m seine	-82.3758	27.8533	absent
TBF1989052604	21.3-m seine	-82.3758	27.8533	absent
TBF1989052605	21.3-m seine	-82.3758	27.8533	absent
TBF1989052606	21.3-m seine	-82.3758	27.8533	absent
TBF1989052607	21.3-m seine	-82.3758	27.8533	absent
TBF1989052608	21.3-m seine	-82.3758	27.8533	absent
TBF1989052609	21.3-m seine	-82.3913	27.8595	absent
TBF1989052610	21.3-m seine	-82.3913	27.8595	absent
TBF1989060201	21.3-m seine	-82.4262	27.6688	absent
TBF1989060202	21.3-m seine	-82.4262	27.6688	absent
TBF1989060203	21.3-m seine	-82.4262	27.6688	absent
TBF1989060204	21.3-m seine	-82.4518	27.6908	absent
TBF1989060205	21.3-m seine	-82.4518	27.6908	absent
TBF1989060206	21.3-m seine	-82.4518	27.6908	absent
TBF1989060207	21.3-m seine	-82.4518	27.6908	absent
TBF1989060208	21.3-m seine	-82.4518	27.6908	absent
TBF1989060209	21.3-m seine	-82.4518	27.6908	absent
TBF1989060704	21.3-m seine	-82.3913	27.8595	absent
TBF1989060705	21.3-m seine	-82.3913	27.8595	absent
TBF1989060706	21.3-m seine	-82.3758	27.8533	absent
TBF1989060709	21.3-m seine	-82.3758	27.8533	absent
TBF1989060711	21.3-m seine	-82.3758	27.8533	absent
TBF1989060712	21.3-m seine	-82.3758	27.8533	absent
TBF1989060713	21.3-m seine	-82.3758	27.8533	absent
TBF1989060715	21.3-m seine	-82.3758	27.8533	absent
TBF1989060717	21.3-m seine	-82.3758	27.8533	absent
TBF1989060718	21.3-m seine	-82.3758	27.8533	absent
TBF1989061301	21.3-m seine	-82.4262	27.6688	absent
TBF1989061302	21.3-m seine	-82.4262	27.6688	absent
TBF1989061303	21.3-m seine	-82.4262	27.6688	absent
TBF1989061304	21.3-m seine	-82.4518	27.6908	absent
TBF1989061305	21.3-m seine	-82.4518	27.6908	absent
TBF1989061306	21.3-m seine	-82.4518	27.6908	absent
TBF1989061307	21.3-m seine	-82.4518	27.6908	absent
TBF1989061308	21.3-m seine	-82.4518	27.6908	absent
TBF1989061309	21.3-m seine	-82.4518	27.6908	absent
TBF1989062001	21.3-m seine	-82.3913	27.8595	absent
TBF1989062002	21.3-m seine	-82.3913	27.8595	absent
TBF1989062003	21.3-m seine	-82.3758	27.8533	absent
TBF1989062004	21.3-m seine	-82.3758	27.8533	absent
TBF1989062005	21.3-m seine	-82.3758	27.8533	absent
TBF1989062006	21.3-m seine	-82.3758	27.8533	absent
TBF1989062007	21.3-m seine	-82.3758	27.8533	absent
TBF1989062008	21.3-m seine	-82.3758	27.8533	absent
TBF1989062009	21.3-m seine	-82.3758	27.8533	absent
TBF1989062010	21.3-m seine	-82.3758	27.8533	absent
TBF1989062801	21.3-m seine	-82.4262	27.6688	absent
TBF1989062802	21.3-m seine	-82.4262	27.6688	absent
TBF1989062803	21.3-m seine	-82.4262	27.6688	absent
TBF1989062804	21.3-m seine	-82.4518	27.6908	absent
TBF1989062805	21.3-m seine	-82.4518	27.6908	absent
TBF1989062806	21.3-m seine	-82.4518	27.6908	absent
TBF1989062807	21.3-m seine	-82.4518	27.6908	absent
TBF1989062808	21.3-m seine	-82.4518	27.6908	absent
TBF1989062809	21.3-m seine	-82.4518	27.6908	absent
TBF1989070601	21.3-m seine	-82.3758	27.8533	absent
TBF1989070602	21.3-m seine	-82.3758	27.8533	absent
TBF1989070603	21.3-m seine	-82.3758	27.8533	absent
TBF1989070604	21.3-m seine	-82.3758	27.8533	absent
TBF1989070605	21.3-m seine	-82.3758	27.8533	absent
TBF1989070606	21.3-m seine	-82.3758	27.8533	absent
TBF1989070607	21.3-m seine	-82.3758	27.8533	absent
TBF1989070608	21.3-m seine	-82.3913	27.8595	absent
TBF1989070609	21.3-m seine	-82.3913	27.8595	absent
TBF1989070610	21.3-m seine	-82.3758	27.8533	absent
TBF1989071203	21.3-m seine	-82.4262	27.6688	absent
TBF1989071205	21.3-m seine	-82.4262	27.6688	absent
TBF1989071206	21.3-m seine	-82.4262	27.6688	absent
TBF1989071207	21.3-m seine	-82.4518	27.6908	absent
TBF1989071208	21.3-m seine	-82.4518	27.6908	absent
TBF1989071209	21.3-m seine	-82.4518	27.6908	absent
TBF1989071210	21.3-m seine	-82.4518	27.6908	absent
TBF1989071212	21.3-m seine	-82.4518	27.6908	absent
TBF1989071215	21.3-m seine	-82.4518	27.6908	absent
TBF1989072101	21.3-m seine	-82.3758	27.8533	absent
TBF1989072102	21.3-m seine	-82.3758	27.8533	absent
TBF1989072103	21.3-m seine	-82.3758	27.8533	absent
TBF1989072104	21.3-m seine	-82.3758	27.8533	absent
TBF1989072105	21.3-m seine	-82.3758	27.8533	absent
TBF1989072106	21.3-m seine	-82.3758	27.8533	absent
TBF1989072107	21.3-m seine	-82.3758	27.8533	absent
TBF1989072108	21.3-m seine	-82.3758	27.8533	absent
TBF1989072109	21.3-m seine	-82.3913	27.8595	absent
TBF1989072110	21.3-m seine	-82.3913	27.8595	absent
TBF1989072801	21.3-m seine	-82.4518	27.6908	absent
TBF1989072802	21.3-m seine	-82.4518	27.6908	absent
TBF1989072803	21.3-m seine	-82.4518	27.6908	absent
TBF1989072804	21.3-m seine	-82.4518	27.6908	absent
TBF1989072805	21.3-m seine	-82.4518	27.6908	absent
TBF1989072806	21.3-m seine	-82.4518	27.6908	absent
TBF1989072807	21.3-m seine	-82.4262	27.6688	absent
TBF1989072808	21.3-m seine	-82.4262	27.6688	absent
TBF1989072809	21.3-m seine	-82.4262	27.6688	absent
TBF1989080301	21.3-m seine	-82.3758	27.8533	absent
TBF1989080302	21.3-m seine	-82.3758	27.8533	absent
TBF1989080303	21.3-m seine	-82.3758	27.8533	absent
TBF1989080304	21.3-m seine	-82.3758	27.8533	absent
TBF1989080305	21.3-m seine	-82.3758	27.8533	absent
TBF1989080306	21.3-m seine	-82.3758	27.8533	absent
TBF1989080307	21.3-m seine	-82.3758	27.8533	absent
TBF1989080308	21.3-m seine	-82.3758	27.8533	absent
TBF1989080309	21.3-m seine	-82.3913	27.8595	absent
TBF1989080310	21.3-m seine	-82.3913	27.8595	absent
TBF1989080904	21.3-m seine	-82.5833	27.9717	absent
TBF1989080905	21.3-m seine	-82.5833	27.9717	absent
TBF1989080906	21.3-m seine	-82.5833	27.9717	absent
TBF1989081101	21.3-m seine	-82.4262	27.6688	absent
TBF1989081102	21.3-m seine	-82.4262	27.6688	absent
TBF1989081103	21.3-m seine	-82.4262	27.6688	absent
TBF1989081104	21.3-m seine	-82.4518	27.6908	absent
TBF1989081105	21.3-m seine	-82.4518	27.6908	absent
TBF1989081106	21.3-m seine	-82.4518	27.6908	absent
TBF1989081107	21.3-m seine	-82.4518	27.6908	absent
TBF1989081108	21.3-m seine	-82.4518	27.6908	absent
TBF1989081109	21.3-m seine	-82.4518	27.6908	absent
TBF1989081801	21.3-m seine	-82.3913	27.8595	absent
TBF1989081802	21.3-m seine	-82.3913	27.8595	absent
TBF1989081803	21.3-m seine	-82.3758	27.8533	absent
TBF1989081804	21.3-m seine	-82.3758	27.8533	absent
TBF1989081805	21.3-m seine	-82.3758	27.8533	absent
TBF1989081806	21.3-m seine	-82.3758	27.8533	absent
TBF1989081807	21.3-m seine	-82.3758	27.8533	absent
TBF1989081808	21.3-m seine	-82.3758	27.8533	absent
TBF1989081809	21.3-m seine	-82.3758	27.8533	absent
TBF1989081810	21.3-m seine	-82.3758	27.8533	absent
TBF1989082501	21.3-m seine	-82.4262	27.6688	absent
TBF1989082502	21.3-m seine	-82.4262	27.6688	absent
TBF1989082503	21.3-m seine	-82.4262	27.6688	absent
TBF1989082504	21.3-m seine	-82.4518	27.6908	absent
TBF1989082505	21.3-m seine	-82.4518	27.6908	absent
TBF1989082506	21.3-m seine	-82.4518	27.6908	absent
TBF1989082507	21.3-m seine	-82.4518	27.6908	absent
TBF1989082508	21.3-m seine	-82.4518	27.6908	absent
TBF1989082509	21.3-m seine	-82.4518	27.6908	absent
TBF1989090101	21.3-m seine	-82.3758	27.8533	absent
TBF1989090102	21.3-m seine	-82.3758	27.8533	absent
TBF1989090103	21.3-m seine	-82.3758	27.8533	absent
TBF1989090104	21.3-m seine	-82.3758	27.8533	absent
TBF1989090105	21.3-m seine	-82.3758	27.8533	absent
TBF1989090106	21.3-m seine	-82.3758	27.8533	absent
TBF1989090107	21.3-m seine	-82.3758	27.8533	absent
TBF1989090108	21.3-m seine	-82.3758	27.8533	absent
TBF1989090109	21.3-m seine	-82.3913	27.8595	absent
TBF1989090110	21.3-m seine	-82.3913	27.8595	absent
TBF1989090604	21.3-m seine	-82.5833	27.9717	absent
TBF1989090605	21.3-m seine	-82.5833	27.9717	absent
TBF1989090606	21.3-m seine	-82.5833	27.9717	absent
TBF1989090701	21.3-m seine	-82.4733	27.8383	absent
TBF1989090702	21.3-m seine	-82.4262	27.6688	absent
TBF1989090703	21.3-m seine	-82.4262	27.6688	absent
TBF1989090704	21.3-m seine	-82.4262	27.6688	absent
TBF1989090705	21.3-m seine	-82.4733	27.8383	absent
TBF1989090706	21.3-m seine	-82.4733	27.8383	absent
TBF1989090707	21.3-m seine	-82.4518	27.6908	absent
TBF1989090708	21.3-m seine	-82.4518	27.6908	absent
TBF1989090709	21.3-m seine	-82.4518	27.6908	absent
TBF1989090710	21.3-m seine	-82.4518	27.6908	absent
TBF1989090711	21.3-m seine	-82.4518	27.6908	absent
TBF1989090712	21.3-m seine	-82.4518	27.6908	absent
TBF1989091401	21.3-m seine	-82.3913	27.8595	absent
TBF1989091402	21.3-m seine	-82.3913	27.8595	absent
TBF1989091403	21.3-m seine	-82.3758	27.8533	absent
TBF1989091404	21.3-m seine	-82.3758	27.8533	absent
TBF1989091405	21.3-m seine	-82.3758	27.8533	absent
TBF1989091406	21.3-m seine	-82.3758	27.8533	absent
TBF1989091407	21.3-m seine	-82.3758	27.8533	absent
TBF1989091408	21.3-m seine	-82.3758	27.8533	absent
TBF1989091409	21.3-m seine	-82.3758	27.8533	absent
TBF1989091410	21.3-m seine	-82.3758	27.8533	absent
TBF1989092201	21.3-m seine	-82.4262	27.6688	absent
TBF1989092202	21.3-m seine	-82.4262	27.6688	absent
TBF1989092203	21.3-m seine	-82.4262	27.6688	absent
TBF1989092204	21.3-m seine	-82.4518	27.6908	absent
TBF1989092205	21.3-m seine	-82.4518	27.6908	absent
TBF1989092206	21.3-m seine	-82.4518	27.6908	absent
TBF1989092207	21.3-m seine	-82.4518	27.6908	absent
TBF1989092208	21.3-m seine	-82.4518	27.6908	absent
TBF1989092209	21.3-m seine	-82.4518	27.6908	absent
TBF1989092901	21.3-m seine	-82.3913	27.8595	absent
TBF1989092902	21.3-m seine	-82.3913	27.8595	absent
TBF1989092903	21.3-m seine	-82.3758	27.8533	absent
TBF1989092904	21.3-m seine	-82.3758	27.8533	absent
TBF1989092905	21.3-m seine	-82.3758	27.8533	absent
TBF1989092906	21.3-m seine	-82.3758	27.8533	absent
TBF1989092907	21.3-m seine	-82.3758	27.8533	absent
TBF1989092908	21.3-m seine	-82.3758	27.8533	absent
TBF1989092909	21.3-m seine	-82.3758	27.8533	absent
TBF1989092910	21.3-m seine	-82.3758	27.8533	absent
TBF1989100601	21.3-m seine	-82.4262	27.6688	absent
TBF1989100602	21.3-m seine	-82.4262	27.6688	absent
TBF1989100603	21.3-m seine	-82.4262	27.6688	absent
TBF1989100604	21.3-m seine	-82.4518	27.6908	absent
TBF1989100605	21.3-m seine	-82.4518	27.6908	absent
TBF1989100606	21.3-m seine	-82.4518	27.6908	absent
TBF1989100607	21.3-m seine	-82.4518	27.6908	absent
TBF1989100608	21.3-m seine	-82.4518	27.6908	absent
TBF1989100609	21.3-m seine	-82.4518	27.6908	absent
TBF1989101305	21.3-m seine	-82.4733	27.8383	absent
TBF1989101309	21.3-m seine	-82.5833	27.9717	absent
TBF1989101319	21.3-m seine	-82.4733	27.8383	absent
TBF1989101320	21.3-m seine	-82.4733	27.8383	absent
TBF1989101321	21.3-m seine	-82.5833	27.9717	absent
TBF1989101322	21.3-m seine	-82.5833	27.9717	absent
TBF1989101601	21.3-m seine	-82.3913	27.8595	absent
TBF1989101602	21.3-m seine	-82.3913	27.8595	absent
TBF1989101603	21.3-m seine	-82.3758	27.8533	absent
TBF1989101604	21.3-m seine	-82.3758	27.8533	absent
TBF1989101605	21.3-m seine	-82.3758	27.8533	absent
TBF1989101606	21.3-m seine	-82.3758	27.8533	absent
TBF1989101607	21.3-m seine	-82.3758	27.8533	absent
TBF1989101608	21.3-m seine	-82.3758	27.8533	absent
TBF1989101609	21.3-m seine	-82.3758	27.8533	absent
TBF1989101610	21.3-m seine	-82.3758	27.8533	absent
TBF1989102001	21.3-m seine	-82.4262	27.6688	absent
TBF1989102002	21.3-m seine	-82.4262	27.6688	absent
TBF1989102003	21.3-m seine	-82.4262	27.6688	absent
TBF1989102004	21.3-m seine	-82.4518	27.6908	absent
TBF1989102005	21.3-m seine	-82.4518	27.6908	absent
TBF1989102006	21.3-m seine	-82.4518	27.6908	absent
TBF1989102007	21.3-m seine	-82.4518	27.6908	absent
TBF1989102008	21.3-m seine	-82.4518	27.6908	absent
TBF1989102009	21.3-m seine	-82.4518	27.6908	absent
TBF1989102701	21.3-m seine	-82.3758	27.8533	absent
TBF1989102702	21.3-m seine	-82.3758	27.8533	absent
TBF1989102703	21.3-m seine	-82.3758	27.8533	absent
TBF1989102704	21.3-m seine	-82.3758	27.8533	absent
TBF1989102705	21.3-m seine	-82.3758	27.8533	absent
TBF1989102706	21.3-m seine	-82.3758	27.8533	absent
TBF1989102707	21.3-m seine	-82.3758	27.8533	absent
TBF1989102708	21.3-m seine	-82.3758	27.8533	absent
TBF1989110301	21.3-m seine	-82.4262	27.6688	absent
TBF1989110302	21.3-m seine	-82.4262	27.6688	absent
TBF1989110303	21.3-m seine	-82.4262	27.6688	absent
TBF1989110304	21.3-m seine	-82.4518	27.6908	absent
TBF1989110305	21.3-m seine	-82.4518	27.6908	absent
TBF1989110306	21.3-m seine	-82.4518	27.6908	absent
TBF1989110307	21.3-m seine	-82.4518	27.6908	absent
TBF1989110308	21.3-m seine	-82.4518	27.6908	absent
TBF1989110309	21.3-m seine	-82.4518	27.6908	absent
TBF1989110901	21.3-m seine	-82.3913	27.8595	absent
TBF1989110902	21.3-m seine	-82.3913	27.8595	absent
TBF1989110903	21.3-m seine	-82.3758	27.8533	absent
TBF1989110904	21.3-m seine	-82.3758	27.8533	absent
TBF1989110905	21.3-m seine	-82.3758	27.8533	absent
TBF1989110906	21.3-m seine	-82.3758	27.8533	absent
TBF1989110907	21.3-m seine	-82.3758	27.8533	absent
TBF1989110908	21.3-m seine	-82.3758	27.8533	absent
TBF1989110909	21.3-m seine	-82.3758	27.8533	absent
TBF1989110910	21.3-m seine	-82.3758	27.8533	absent
TBF1989111504	21.3-m seine	-82.5833	27.9717	absent
TBF1989111505	21.3-m seine	-82.5833	27.9717	absent
TBF1989111506	21.3-m seine	-82.5833	27.9717	absent
TBF1989111507	21.3-m seine	-82.4733	27.8383	absent
TBF1989111508	21.3-m seine	-82.4733	27.8383	absent
TBF1989111509	21.3-m seine	-82.4733	27.8383	absent
TBF1989111701	21.3-m seine	-82.4262	27.6688	absent
TBF1989111702	21.3-m seine	-82.4262	27.6688	absent
TBF1989111703	21.3-m seine	-82.4262	27.6688	absent
TBF1989111704	21.3-m seine	-82.4518	27.6908	absent
TBF1989111705	21.3-m seine	-82.4518	27.6908	absent
TBF1989111706	21.3-m seine	-82.4518	27.6908	absent
TBF1989111707	21.3-m seine	-82.4518	27.6908	absent
TBF1989111708	21.3-m seine	-82.4518	27.6908	absent
TBF1989111709	21.3-m seine	-82.4518	27.6908	absent
TBF1989112201	21.3-m seine	-82.3913	27.8595	absent
TBF1989112202	21.3-m seine	-82.3913	27.8595	absent
TBF1989112203	21.3-m seine	-82.3758	27.8533	absent
TBF1989112204	21.3-m seine	-82.3758	27.8533	absent
TBF1989112205	21.3-m seine	-82.3758	27.8533	absent
TBF1989112206	21.3-m seine	-82.3758	27.8533	absent
TBF1989112207	21.3-m seine	-82.3758	27.8533	absent
TBF1989112208	21.3-m seine	-82.3758	27.8533	absent
TBF1989112209	21.3-m seine	-82.3758	27.8533	absent
TBF1989112210	21.3-m seine	-82.3758	27.8533	absent
TBF1989112801	21.3-m seine	-82.4262	27.6688	absent
TBF1989112802	21.3-m seine	-82.4262	27.6688	absent
TBF1989112803	21.3-m seine	-82.4262	27.6688	absent
TBF1989112804	21.3-m seine	-82.4518	27.6908	absent
TBF1989112805	21.3-m seine	-82.4518	27.6908	absent
TBF1989112806	21.3-m seine	-82.4518	27.6908	absent
TBF1989112807	21.3-m seine	-82.4518	27.6908	absent
TBF1989112808	21.3-m seine	-82.4518	27.6908	absent
TBF1989112809	21.3-m seine	-82.4518	27.6908	absent
TBF1989120701	21.3-m seine	-82.3758	27.8533	absent
TBF1989120702	21.3-m seine	-82.3758	27.8533	absent
TBF1989120703	21.3-m seine	-82.3758	27.8533	absent
TBF1989120704	21.3-m seine	-82.3758	27.8533	absent
TBF1989120705	21.3-m seine	-82.3758	27.8533	absent
TBF1989120706	21.3-m seine	-82.3758	27.8533	absent
TBF1989120707	21.3-m seine	-82.3758	27.8533	absent
TBF1989120708	21.3-m seine	-82.3758	27.8533	absent
TBF1989121501	21.3-m seine	-82.4518	27.6908	absent
TBF1989121502	21.3-m seine	-82.4518	27.6908	absent
TBF1989121503	21.3-m seine	-82.4518	27.6908	absent
TBF1989121505	21.3-m seine	-82.4518	27.6908	absent
TBF1989121507	21.3-m seine	-82.4518	27.6908	absent
TBF1989121509	21.3-m seine	-82.4518	27.6908	absent
TBF1989121513	21.3-m seine	-82.4262	27.6688	absent
TBF1989121514	21.3-m seine	-82.5833	27.9717	absent
TBF1989121515	21.3-m seine	-82.5833	27.9717	absent
TBF1989121516	21.3-m seine	-82.5833	27.9717	absent
TBF1989121517	21.3-m seine	-82.4262	27.6688	absent
TBF1989121518	21.3-m seine	-82.4262	27.6688	absent
TBF1989121519	21.3-m seine	-82.4733	27.8383	absent
TBF1989121520	21.3-m seine	-82.4733	27.8383	absent
TBF1989121521	21.3-m seine	-82.4733	27.8383	absent
TBF1989122001	21.3-m seine	-82.3758	27.8533	absent
TBF1989122002	21.3-m seine	-82.3758	27.8533	absent
TBF1989122003	21.3-m seine	-82.3758	27.8533	absent
TBF1989122004	21.3-m seine	-82.3758	27.8533	absent
TBF1989122005	21.3-m seine	-82.3758	27.8533	absent
TBF1989122006	21.3-m seine	-82.3758	27.8533	absent
TBF1989122007	21.3-m seine	-82.3758	27.8533	absent
TBF1989122011	21.3-m seine	-82.3758	27.8533	absent
TBF1989122013	21.3-m seine	-82.3913	27.8595	absent
TBF1989122014	21.3-m seine	-82.3913	27.8595	absent
TBF1990010301	21.3-m seine	-82.4262	27.6688	absent
TBF1990010302	21.3-m seine	-82.4262	27.6688	absent
TBF1990010303	21.3-m seine	-82.3913	27.8595	absent
TBF1990010304	21.3-m seine	-82.3913	27.8595	absent
TBF1990010305	21.3-m seine	-82.4262	27.6688	absent
TBF1990010306	21.3-m seine	-82.4518	27.6908	absent
TBF1990010308	21.3-m seine	-82.4518	27.6908	absent
TBF1990010310	21.3-m seine	-82.4518	27.6908	absent
TBF1990010311	21.3-m seine	-82.4518	27.6908	absent
TBF1990010312	21.3-m seine	-82.4518	27.6908	absent
TBF1990010313	21.3-m seine	-82.4518	27.6908	absent
TBF1990010314	21.3-m seine	-82.3758	27.8533	absent
TBF1990010315	21.3-m seine	-82.3758	27.8533	absent
TBF1990010316	21.3-m seine	-82.3758	27.8533	absent
TBF1990010317	21.3-m seine	-82.3758	27.8533	absent
TBF1990010318	21.3-m seine	-82.3758	27.8533	absent
TBF1990010319	21.3-m seine	-82.3758	27.8533	absent
TBF1990010320	21.3-m seine	-82.3758	27.8533	absent
TBF1990010321	21.3-m seine	-82.3758	27.8533	absent
TBF1990011104	21.3-m seine	-82.5833	27.9717	absent
TBF1990011105	21.3-m seine	-82.5833	27.9717	absent
TBF1990011106	21.3-m seine	-82.5833	27.9717	absent
TBF1990011107	21.3-m seine	-82.4733	27.8383	absent
TBF1990011108	21.3-m seine	-82.4733	27.8383	absent
TBF1990011109	21.3-m seine	-82.4733	27.8383	absent
TBF1990011110	21.3-m seine	-82.6367	27.8883	absent
TBF1990011111	21.3-m seine	-82.6367	27.8883	absent
TBF1990011112	21.3-m seine	-82.6367	27.8883	absent
TBF1990011116	21.3-m seine	-82.3913	27.8595	absent
TBF1990011117	21.3-m seine	-82.3913	27.8595	absent
TBF1990011201	21.3-m seine	-82.64	27.9067	absent
TBF1990011202	21.3-m seine	-82.64	27.9067	absent
TBF1990011203	21.3-m seine	-82.64	27.9067	absent
TBF1990011204	21.3-m seine	-82.7367	27.6383	absent
TBF1990011205	21.3-m seine	-82.7367	27.6383	absent
TBF1990011206	21.3-m seine	-82.7367	27.6383	absent
TBF1990011207	21.3-m seine	-82.3758	27.8533	absent
TBF1990011211	21.3-m seine	-82.3758	27.8533	absent
TBF1990011212	21.3-m seine	-82.3758	27.8533	absent
TBF1990011213	21.3-m seine	-82.3758	27.8533	absent
TBF1990011217	21.3-m seine	-82.3758	27.8533	absent
TBF1990011218	21.3-m seine	-82.3758	27.8533	absent
TBF1990011219	21.3-m seine	-82.3758	27.8533	absent
TBF1990011220	21.3-m seine	-82.3758	27.8533	absent
TBF1990011901	21.3-m seine	-82.4262	27.6688	absent
TBF1990011902	21.3-m seine	-82.4262	27.6688	absent
TBF1990011903	21.3-m seine	-82.4262	27.6688	absent
TBF1990011904	21.3-m seine	-82.4518	27.6908	absent
TBF1990011905	21.3-m seine	-82.4518	27.6908	absent
TBF1990011906	21.3-m seine	-82.4518	27.6908	absent
TBF1990011907	21.3-m seine	-82.4518	27.6908	absent
TBF1990011908	21.3-m seine	-82.4518	27.6908	absent
TBF1990011909	21.3-m seine	-82.4518	27.6908	absent
TBF1990012901	21.3-m seine	-82.3913	27.8595	absent
TBF1990012902	21.3-m seine	-82.3913	27.8595	absent
TBF1990012903	21.3-m seine	-82.3758	27.8533	absent
TBF1990012904	21.3-m seine	-82.3758	27.8533	absent
TBF1990012905	21.3-m seine	-82.3758	27.8533	absent
TBF1990012906	21.3-m seine	-82.3758	27.8533	absent
TBF1990012907	21.3-m seine	-82.3758	27.8533	absent
TBF1990012908	21.3-m seine	-82.3758	27.8533	absent
TBF1990012909	21.3-m seine	-82.3758	27.8533	absent
TBF1990012910	21.3-m seine	-82.3758	27.8533	absent
TBF1990020201	21.3-m seine	-82.4262	27.6688	absent
TBF1990020202	21.3-m seine	-82.4262	27.6688	absent
TBF1990020203	21.3-m seine	-82.4262	27.6688	absent
TBF1990020210	21.3-m seine	-82.4518	27.6908	absent
TBF1990020211	21.3-m seine	-82.4518	27.6908	absent
TBF1990020212	21.3-m seine	-82.4518	27.6908	absent
TBF1990020213	21.3-m seine	-82.4518	27.6908	absent
TBF1990020214	21.3-m seine	-82.4518	27.6908	absent
TBF1990020215	21.3-m seine	-82.4518	27.6908	absent
TBF1990020604	21.3-m seine	-82.5833	27.9717	absent
TBF1990020605	21.3-m seine	-82.5833	27.9717	absent
TBF1990020606	21.3-m seine	-82.5833	27.9717	absent
TBF1990020607	21.3-m seine	-82.4733	27.8383	absent
TBF1990020608	21.3-m seine	-82.4733	27.8383	absent
TBF1990020609	21.3-m seine	-82.4733	27.8383	absent
TBF1990020701	21.3-m seine	-82.7367	27.6383	absent
TBF1990020702	21.3-m seine	-82.7367	27.6383	absent
TBF1990020703	21.3-m seine	-82.7367	27.6383	absent
TBF1990020710	21.3-m seine	-82.3758	27.8533	absent
TBF1990020711	21.3-m seine	-82.3758	27.8533	absent
TBF1990020712	21.3-m seine	-82.3758	27.8533	absent
TBF1990020713	21.3-m seine	-82.3758	27.8533	absent
TBF1990020714	21.3-m seine	-82.3758	27.8533	absent
TBF1990020715	21.3-m seine	-82.3758	27.8533	absent
TBF1990020717	21.3-m seine	-82.3758	27.8533	absent
TBF1990020720	21.3-m seine	-82.3758	27.8533	absent
TBF1990020805	21.3-m seine	-82.3913	27.8595	absent
TBF1990020808	21.3-m seine	-82.3913	27.8595	absent
TBF1990021501	21.3-m seine	-82.4262	27.6688	absent
TBF1990021502	21.3-m seine	-82.4262	27.6688	absent
TBF1990021503	21.3-m seine	-82.4262	27.6688	absent
TBF1990021504	21.3-m seine	-82.4518	27.6908	absent
TBF1990021505	21.3-m seine	-82.4518	27.6908	absent
TBF1990021506	21.3-m seine	-82.4518	27.6908	absent
TBF1990021507	21.3-m seine	-82.4518	27.6908	absent
TBF1990021508	21.3-m seine	-82.4518	27.6908	absent
TBF1990021509	21.3-m seine	-82.4518	27.6908	absent
TBF1990022201	21.3-m seine	-82.3913	27.8595	absent
TBF1990022202	21.3-m seine	-82.3913	27.8595	absent
TBF1990022203	21.3-m seine	-82.3758	27.8533	absent
TBF1990022204	21.3-m seine	-82.3758	27.8533	absent
TBF1990022205	21.3-m seine	-82.3758	27.8533	absent
TBF1990022206	21.3-m seine	-82.3758	27.8533	absent
TBF1990022207	21.3-m seine	-82.3758	27.8533	absent
TBF1990022208	21.3-m seine	-82.3758	27.8533	absent
TBF1990022209	21.3-m seine	-82.3758	27.8533	absent
TBF1990022210	21.3-m seine	-82.3758	27.8533	absent
TBF1990030201	21.3-m seine	-82.4262	27.6688	absent
TBF1990030202	21.3-m seine	-82.4262	27.6688	absent
TBF1990030203	21.3-m seine	-82.4262	27.6688	absent
TBF1990030204	21.3-m seine	-82.4518	27.6908	absent
TBF1990030205	21.3-m seine	-82.4518	27.6908	absent
TBF1990030206	21.3-m seine	-82.4518	27.6908	absent
TBF1990030207	21.3-m seine	-82.4518	27.6908	absent
TBF1990030208	21.3-m seine	-82.4518	27.6908	absent
TBF1990030209	21.3-m seine	-82.4518	27.6908	absent
TBF1990030601	21.3-m seine	-82.5833	27.9717	absent
TBF1990030602	21.3-m seine	-82.5833	27.9717	absent
TBF1990030603	21.3-m seine	-82.5833	27.9717	absent
TBF1990030605	21.3-m seine	-82.4733	27.8383	absent
TBF1990030607	21.3-m seine	-82.4733	27.8383	absent
TBF1990030608	21.3-m seine	-82.4733	27.8383	absent
TBF1990030701	21.3-m seine	-82.64	27.9067	absent
TBF1990030702	21.3-m seine	-82.64	27.9067	absent
TBF1990030703	21.3-m seine	-82.64	27.9067	absent
TBF1990030801	21.3-m seine	-82.3913	27.8595	absent
TBF1990030802	21.3-m seine	-82.3913	27.8595	absent
TBF1990030806	21.3-m seine	-82.3758	27.8533	absent
TBF1990030807	21.3-m seine	-82.3758	27.8533	absent
TBF1990030808	21.3-m seine	-82.3758	27.8533	absent
TBF1990030809	21.3-m seine	-82.3758	27.8533	absent
TBF1990030810	21.3-m seine	-82.3758	27.8533	absent
TBF1990030811	21.3-m seine	-82.3758	27.8533	absent
TBF1990030812	21.3-m seine	-82.3758	27.8533	absent
TBF1990030813	21.3-m seine	-82.3758	27.8533	absent
TBF1990031501	21.3-m seine	-82.4262	27.6688	absent
TBF1990031502	21.3-m seine	-82.4262	27.6688	absent
TBF1990031503	21.3-m seine	-82.4262	27.6688	absent
TBF1990031510	21.3-m seine	-82.4518	27.6908	absent
TBF1990031511	21.3-m seine	-82.4518	27.6908	absent
TBF1990031512	21.3-m seine	-82.4518	27.6908	absent
TBF1990031513	21.3-m seine	-82.4518	27.6908	absent
TBF1990031514	21.3-m seine	-82.4518	27.6908	absent
TBF1990031515	21.3-m seine	-82.4518	27.6908	absent
TBF1990032201	21.3-m seine	-82.3913	27.8595	absent
TBF1990032202	21.3-m seine	-82.3913	27.8595	absent
TBF1990032203	21.3-m seine	-82.3758	27.8533	absent
TBF1990032204	21.3-m seine	-82.3758	27.8533	absent
TBF1990032205	21.3-m seine	-82.3758	27.8533	absent
TBF1990032206	21.3-m seine	-82.3758	27.8533	absent
TBF1990032207	21.3-m seine	-82.3758	27.8533	absent
TBF1990032208	21.3-m seine	-82.3758	27.8533	absent
TBF1990032209	21.3-m seine	-82.3758	27.8533	absent
TBF1990032210	21.3-m seine	-82.3758	27.8533	absent
TBF1990032901	21.3-m seine	-82.4518	27.6908	absent
TBF1990032902	21.3-m seine	-82.4518	27.6908	absent
TBF1990032903	21.3-m seine	-82.4518	27.6908	absent
TBF1990032904	21.3-m seine	-82.4518	27.6908	absent
TBF1990032905	21.3-m seine	-82.4518	27.6908	absent
TBF1990032906	21.3-m seine	-82.4518	27.6908	absent
TBF1990032907	21.3-m seine	-82.4262	27.6688	absent
TBF1990032908	21.3-m seine	-82.4262	27.6688	absent
TBF1990032909	21.3-m seine	-82.4262	27.6688	absent
TBF1990040601	21.3-m seine	-82.3913	27.8595	absent
TBF1990040602	21.3-m seine	-82.3913	27.8595	absent
TBF1990040603	21.3-m seine	-82.3758	27.8533	absent
TBF1990040604	21.3-m seine	-82.3758	27.8533	absent
TBF1990040605	21.3-m seine	-82.3758	27.8533	absent
TBF1990040606	21.3-m seine	-82.3758	27.8533	absent
TBF1990040607	21.3-m seine	-82.3758	27.8533	absent
TBF1990040608	21.3-m seine	-82.3758	27.8533	absent
TBF1990040609	21.3-m seine	-82.3758	27.8533	absent
TBF1990040610	21.3-m seine	-82.3758	27.8533	absent
TBF1990041007	21.3-m seine	-82.5833	27.9717	absent
TBF1990041008	21.3-m seine	-82.5833	27.9717	absent
TBF1990041009	21.3-m seine	-82.5833	27.9717	absent
TBF1990041010	21.3-m seine	-82.4733	27.8383	absent
TBF1990041011	21.3-m seine	-82.4733	27.8383	absent
TBF1990041012	21.3-m seine	-82.4733	27.8383	absent
TBF1990041201	21.3-m seine	-82.4262	27.6688	absent
TBF1990041205	21.3-m seine	-82.4262	27.6688	absent
TBF1990041212	21.3-m seine	-82.4518	27.6908	absent
TBF1990041213	21.3-m seine	-82.4518	27.6908	absent
TBF1990041214	21.3-m seine	-82.4518	27.6908	absent
TBF1990041215	21.3-m seine	-82.4518	27.6908	absent
TBF1990041216	21.3-m seine	-82.4518	27.6908	absent
TBF1990041217	21.3-m seine	-82.4262	27.6688	absent
TBF1990041218	21.3-m seine	-82.4518	27.6908	absent
TBF1990041901	21.3-m seine	-82.3913	27.8595	absent
TBF1990041902	21.3-m seine	-82.3913	27.8595	absent
TBF1990041903	21.3-m seine	-82.3758	27.8533	absent
TBF1990041904	21.3-m seine	-82.3758	27.8533	absent
TBF1990041905	21.3-m seine	-82.3758	27.8533	absent
TBF1990041906	21.3-m seine	-82.3758	27.8533	absent
TBF1990041907	21.3-m seine	-82.3758	27.8533	absent
TBF1990041908	21.3-m seine	-82.3758	27.8533	absent
TBF1990041909	21.3-m seine	-82.3758	27.8533	absent
TBF1990041910	21.3-m seine	-82.3758	27.8533	absent
TBF1990042601	21.3-m seine	-82.4262	27.6688	absent
TBF1990042602	21.3-m seine	-82.4262	27.6688	absent
TBF1990042603	21.3-m seine	-82.4262	27.6688	absent
TBF1990042604	21.3-m seine	-82.4518	27.6908	absent
TBF1990042605	21.3-m seine	-82.4518	27.6908	absent
TBF1990042606	21.3-m seine	-82.4518	27.6908	absent
TBF1990042607	21.3-m seine	-82.4518	27.6908	absent
TBF1990042608	21.3-m seine	-82.4518	27.6908	absent
TBF1990042609	21.3-m seine	-82.4518	27.6908	absent
TBF1990050301	21.3-m seine	-82.3913	27.8595	absent
TBF1990050302	21.3-m seine	-82.3913	27.8595	absent
TBF1990050303	21.3-m seine	-82.3758	27.8533	absent
TBF1990050304	21.3-m seine	-82.3758	27.8533	absent
TBF1990050305	21.3-m seine	-82.3758	27.8533	absent
TBF1990050306	21.3-m seine	-82.3758	27.8533	absent
TBF1990050307	21.3-m seine	-82.3758	27.8533	absent
TBF1990050308	21.3-m seine	-82.3758	27.8533	absent
TBF1990050309	21.3-m seine	-82.3758	27.8533	absent
TBF1990050310	21.3-m seine	-82.3758	27.8533	absent
TBF1990051001	21.3-m seine	-82.4262	27.6688	absent
TBF1990051002	21.3-m seine	-82.4262	27.6688	absent
TBF1990051003	21.3-m seine	-82.4262	27.6688	absent
TBF1990051007	21.3-m seine	-82.4518	27.6908	absent
TBF1990051011	21.3-m seine	-82.4518	27.6908	absent
TBF1990051012	21.3-m seine	-82.4518	27.6908	absent
TBF1990051013	21.3-m seine	-82.4518	27.6908	absent
TBF1990051014	21.3-m seine	-82.4518	27.6908	absent
TBF1990051015	21.3-m seine	-82.4518	27.6908	absent
TBF1990051113	21.3-m seine	-82.4733	27.8383	absent
TBF1990051114	21.3-m seine	-82.4733	27.8383	absent
TBF1990051115	21.3-m seine	-82.4733	27.8383	absent
TBF1990051701	21.3-m seine	-82.3913	27.8595	absent
TBF1990051702	21.3-m seine	-82.3913	27.8595	absent
TBF1990051703	21.3-m seine	-82.3758	27.8533	absent
TBF1990051704	21.3-m seine	-82.3758	27.8533	absent
TBF1990051705	21.3-m seine	-82.3758	27.8533	absent
TBF1990051706	21.3-m seine	-82.3758	27.8533	absent
TBF1990051707	21.3-m seine	-82.3758	27.8533	absent
TBF1990051708	21.3-m seine	-82.3758	27.8533	absent
TBF1990051709	21.3-m seine	-82.3758	27.8533	absent
TBF1990051710	21.3-m seine	-82.3758	27.8533	absent
TBF1990052401	21.3-m seine	-82.4262	27.6688	absent
TBF1990052402	21.3-m seine	-82.4262	27.6688	absent
TBF1990052403	21.3-m seine	-82.4262	27.6688	absent
TBF1990052407	21.3-m seine	-82.4518	27.6908	absent
TBF1990052408	21.3-m seine	-82.4518	27.6908	absent
TBF1990052409	21.3-m seine	-82.4518	27.6908	absent
TBF1990052410	21.3-m seine	-82.4518	27.6908	absent
TBF1990052411	21.3-m seine	-82.4518	27.6908	absent
TBF1990052412	21.3-m seine	-82.4518	27.6908	absent
TBF1990053101	21.3-m seine	-82.3913	27.8595	absent
TBF1990053102	21.3-m seine	-82.3913	27.8595	absent
TBF1990053106	21.3-m seine	-82.3758	27.8533	absent
TBF1990053107	21.3-m seine	-82.3758	27.8533	absent
TBF1990053108	21.3-m seine	-82.3758	27.8533	absent
TBF1990053109	21.3-m seine	-82.3758	27.8533	absent
TBF1990053110	21.3-m seine	-82.3758	27.8533	absent
TBF1990053111	21.3-m seine	-82.3758	27.8533	absent
TBF1990053112	21.3-m seine	-82.3758	27.8533	absent
TBF1990053113	21.3-m seine	-82.3758	27.8533	absent
TBF1990060804	21.3-m seine	-82.4262	27.6688	absent
TBF1990060805	21.3-m seine	-82.4262	27.6688	absent
TBF1990060810	21.3-m seine	-82.4262	27.6688	absent
TBF1990060824	21.3-m seine	-82.4518	27.6908	absent
TBF1990060826	21.3-m seine	-82.4518	27.6908	absent
TBF1990060827	21.3-m seine	-82.5833	27.9717	absent
TBF1990060828	21.3-m seine	-82.4518	27.6908	absent
TBF1990060829	21.3-m seine	-82.5833	27.9717	absent
TBF1990060830	21.3-m seine	-82.5833	27.9717	absent
TBF1990060831	21.3-m seine	-82.4518	27.6908	absent
TBF1990060832	21.3-m seine	-82.4518	27.6908	absent
TBF1990060834	21.3-m seine	-82.4518	27.6908	absent
TBF1990061504	21.3-m seine	-82.3758	27.8533	absent
TBF1990061505	21.3-m seine	-82.3758	27.8533	absent
TBF1990061506	21.3-m seine	-82.3758	27.8533	absent
TBF1990061507	21.3-m seine	-82.3758	27.8533	absent
TBF1990061508	21.3-m seine	-82.3758	27.8533	absent
TBF1990061509	21.3-m seine	-82.3758	27.8533	absent
TBF1990061510	21.3-m seine	-82.3758	27.8533	absent
TBF1990061511	21.3-m seine	-82.3758	27.8533	absent
TBF1990061512	21.3-m seine	-82.3913	27.8595	absent
TBF1990061513	21.3-m seine	-82.3913	27.8595	absent
TBF1990062101	21.3-m seine	-82.4262	27.6688	absent
TBF1990062102	21.3-m seine	-82.4262	27.6688	absent
TBF1990062103	21.3-m seine	-82.4262	27.6688	absent
TBF1990062110	21.3-m seine	-82.4518	27.6908	absent
TBF1990062111	21.3-m seine	-82.4518	27.6908	absent
TBF1990062112	21.3-m seine	-82.4518	27.6908	absent
TBF1990062113	21.3-m seine	-82.4518	27.6908	absent
TBF1990062114	21.3-m seine	-82.4518	27.6908	absent
TBF1990062115	21.3-m seine	-82.4518	27.6908	absent
TBF1990062904	21.3-m seine	-82.3758	27.8533	absent
TBF1990062905	21.3-m seine	-82.3758	27.8533	absent
TBF1990062906	21.3-m seine	-82.3758	27.8533	absent
TBF1990062907	21.3-m seine	-82.3758	27.8533	absent
TBF1990062908	21.3-m seine	-82.3758	27.8533	absent
TBF1990062909	21.3-m seine	-82.3758	27.8533	absent
TBF1990062910	21.3-m seine	-82.3758	27.8533	absent
TBF1990062911	21.3-m seine	-82.3758	27.8533	absent
TBF1990062912	21.3-m seine	-82.3913	27.8595	absent
TBF1990062913	21.3-m seine	-82.3913	27.8595	absent
TBF1990070601	21.3-m seine	-82.4262	27.6688	absent
TBF1990070602	21.3-m seine	-82.4262	27.6688	absent
TBF1990070605	21.3-m seine	-82.4262	27.6688	absent
TBF1990070616	21.3-m seine	-82.4518	27.6908	absent
TBF1990070617	21.3-m seine	-82.4518	27.6908	absent
TBF1990070618	21.3-m seine	-82.4518	27.6908	absent
TBF1990070619	21.3-m seine	-82.4518	27.6908	absent
TBF1990070620	21.3-m seine	-82.4518	27.6908	absent
TBF1990070621	21.3-m seine	-82.4518	27.6908	absent
TBF1990071204	21.3-m seine	-82.3913	27.8595	absent
TBF1990071205	21.3-m seine	-82.3913	27.8595	absent
TBF1990071206	21.3-m seine	-82.3758	27.8533	absent
TBF1990071207	21.3-m seine	-82.3758	27.8533	absent
TBF1990071208	21.3-m seine	-82.3758	27.8533	absent
TBF1990071209	21.3-m seine	-82.3758	27.8533	absent
TBF1990071210	21.3-m seine	-82.3758	27.8533	absent
TBF1990071211	21.3-m seine	-82.3758	27.8533	absent
TBF1990071212	21.3-m seine	-82.3758	27.8533	absent
TBF1990071213	21.3-m seine	-82.3758	27.8533	absent
TBF1990071901	21.3-m seine	-82.4262	27.6688	absent
TBF1990071902	21.3-m seine	-82.4262	27.6688	absent
TBF1990071904	21.3-m seine	-82.4262	27.6688	absent
TBF1990071910	21.3-m seine	-82.4518	27.6908	absent
TBF1990071911	21.3-m seine	-82.4518	27.6908	absent
TBF1990071912	21.3-m seine	-82.4518	27.6908	absent
TBF1990071913	21.3-m seine	-82.4518	27.6908	absent
TBF1990071914	21.3-m seine	-82.4518	27.6908	absent
TBF1990071915	21.3-m seine	-82.4518	27.6908	absent
TBF1990072604	21.3-m seine	-82.3758	27.8533	absent
TBF1990072605	21.3-m seine	-82.3758	27.8533	absent
TBF1990072606	21.3-m seine	-82.3758	27.8533	absent
TBF1990072607	21.3-m seine	-82.3758	27.8533	absent
TBF1990072608	21.3-m seine	-82.3758	27.8533	absent
TBF1990072609	21.3-m seine	-82.3758	27.8533	absent
TBF1990072610	21.3-m seine	-82.3758	27.8533	absent
TBF1990072611	21.3-m seine	-82.3913	27.8595	absent
TBF1990072612	21.3-m seine	-82.3913	27.8595	absent
TBF1990072613	21.3-m seine	-82.3758	27.8533	absent
TBF1990080301	21.3-m seine	-82.4262	27.6688	absent
TBF1990080302	21.3-m seine	-82.4262	27.6688	absent
TBF1990080303	21.3-m seine	-82.4262	27.6688	absent
TBF1990080310	21.3-m seine	-82.4518	27.6908	absent
TBF1990080311	21.3-m seine	-82.4518	27.6908	absent
TBF1990080312	21.3-m seine	-82.4518	27.6908	absent
TBF1990080313	21.3-m seine	-82.4518	27.6908	absent
TBF1990080314	21.3-m seine	-82.4518	27.6908	absent
TBF1990080315	21.3-m seine	-82.4518	27.6908	absent
TBF1990080907	21.3-m seine	-82.3913	27.8595	absent
TBF1990080908	21.3-m seine	-82.3913	27.8595	absent
TBF1990080913	21.3-m seine	-82.3758	27.8533	absent
TBF1990080914	21.3-m seine	-82.3758	27.8533	absent
TBF1990080916	21.3-m seine	-82.3758	27.8533	absent
TBF1990080917	21.3-m seine	-82.3758	27.8533	absent
TBF1990080920	21.3-m seine	-82.3758	27.8533	absent
TBF1990080922	21.3-m seine	-82.3758	27.8533	absent
TBF1990080924	21.3-m seine	-82.3758	27.8533	absent
TBF1990080926	21.3-m seine	-82.3758	27.8533	absent
TBF1990081601	21.3-m seine	-82.4262	27.6688	absent
TBF1990081602	21.3-m seine	-82.4262	27.6688	absent
TBF1990081603	21.3-m seine	-82.4262	27.6688	absent
TBF1990081701	21.3-m seine	-82.4518	27.6908	absent
TBF1990081702	21.3-m seine	-82.4518	27.6908	absent
TBF1990081703	21.3-m seine	-82.4518	27.6908	absent
TBF1990081704	21.3-m seine	-82.4518	27.6908	absent
TBF1990081705	21.3-m seine	-82.4518	27.6908	absent
TBF1990081706	21.3-m seine	-82.4518	27.6908	absent
TBF1990082401	21.3-m seine	-82.3913	27.8595	absent
TBF1990082402	21.3-m seine	-82.3913	27.8595	absent
TBF1990082403	21.3-m seine	-82.3758	27.8533	absent
TBF1990082404	21.3-m seine	-82.3758	27.8533	absent
TBF1990082405	21.3-m seine	-82.3758	27.8533	absent
TBF1990082406	21.3-m seine	-82.3758	27.8533	absent
TBF1990082407	21.3-m seine	-82.3758	27.8533	absent
TBF1990082408	21.3-m seine	-82.3758	27.8533	absent
TBF1990082409	21.3-m seine	-82.3758	27.8533	absent
TBF1990082410	21.3-m seine	-82.3758	27.8533	absent
TBF1990083101	21.3-m seine	-82.4262	27.6688	absent
TBF1990083102	21.3-m seine	-82.4262	27.6688	absent
TBF1990083103	21.3-m seine	-82.4262	27.6688	absent
TBF1990083110	21.3-m seine	-82.4518	27.6908	absent
TBF1990083111	21.3-m seine	-82.4518	27.6908	absent
TBF1990083112	21.3-m seine	-82.4518	27.6908	absent
TBF1990083113	21.3-m seine	-82.4518	27.6908	absent
TBF1990083114	21.3-m seine	-82.4518	27.6908	absent
TBF1990083115	21.3-m seine	-82.4518	27.6908	absent
TBF1990092007	21.3-m seine	-82.4262	27.6688	absent
TBF1990092008	21.3-m seine	-82.4262	27.6688	absent
TBF1990092009	21.3-m seine	-82.4262	27.6688	absent
TBF1990092010	21.3-m seine	-82.4518	27.6908	absent
TBF1990092011	21.3-m seine	-82.4518	27.6908	absent
TBF1990092012	21.3-m seine	-82.4518	27.6908	absent
TBF1990092013	21.3-m seine	-82.4518	27.6908	absent
TBF1990092014	21.3-m seine	-82.4518	27.6908	absent
TBF1990092015	21.3-m seine	-82.4518	27.6908	absent
TBF1990092104	21.3-m seine	-82.3758	27.8533	absent
TBF1990092105	21.3-m seine	-82.3758	27.8533	absent
TBF1990092106	21.3-m seine	-82.3758	27.8533	absent
TBF1990092107	21.3-m seine	-82.3758	27.8533	absent
TBF1990092108	21.3-m seine	-82.3758	27.8533	absent
TBF1990092109	21.3-m seine	-82.3758	27.8533	absent
TBF1990092110	21.3-m seine	-82.3758	27.8533	absent
TBF1990092111	21.3-m seine	-82.3758	27.8533	absent
TBF1990092112	21.3-m seine	-82.3913	27.8595	absent
TBF1990092113	21.3-m seine	-82.3913	27.8595	absent
TBF1990102404	21.3-m seine	-82.3758	27.8533	absent
TBF1990102405	21.3-m seine	-82.3758	27.8533	absent
TBF1990102406	21.3-m seine	-82.3758	27.8533	absent
TBF1990102407	21.3-m seine	-82.3758	27.8533	absent
TBF1990102408	21.3-m seine	-82.3758	27.8533	absent
TBF1990102409	21.3-m seine	-82.3758	27.8533	absent
TBF1990102410	21.3-m seine	-82.3758	27.8533	absent
TBF1990102411	21.3-m seine	-82.3758	27.8533	absent
TBF1990102412	21.3-m seine	-82.3913	27.8595	absent
TBF1990102413	21.3-m seine	-82.3913	27.8595	absent
TBF1990102607	21.3-m seine	-82.4262	27.6688	absent
TBF1990102608	21.3-m seine	-82.4262	27.6688	absent
TBF1990102609	21.3-m seine	-82.4262	27.6688	absent
TBF1990102610	21.3-m seine	-82.4518	27.6908	absent
TBF1990102611	21.3-m seine	-82.4518	27.6908	absent
TBF1990102612	21.3-m seine	-82.4518	27.6908	absent
TBF1990102613	21.3-m seine	-82.4518	27.6908	absent
TBF1990102614	21.3-m seine	-82.4518	27.6908	absent
TBF1990102615	21.3-m seine	-82.4518	27.6908	absent
TBF1990111901	21.3-m seine	-82.4262	27.6688	absent
TBF1990111902	21.3-m seine	-82.4262	27.6688	absent
TBF1990111903	21.3-m seine	-82.4262	27.6688	absent
TBF1990111910	21.3-m seine	-82.4518	27.6908	absent
TBF1990111911	21.3-m seine	-82.4518	27.6908	absent
TBF1990111912	21.3-m seine	-82.4518	27.6908	absent
TBF1990111913	21.3-m seine	-82.4518	27.6908	absent
TBF1990111914	21.3-m seine	-82.4518	27.6908	absent
TBF1990111915	21.3-m seine	-82.4518	27.6908	absent
TBF1990112001	21.3-m seine	-82.3913	27.8595	absent
TBF1990112002	21.3-m seine	-82.3913	27.8595	absent
TBF1990112006	21.3-m seine	-82.3758	27.8533	absent
TBF1990112007	21.3-m seine	-82.3758	27.8533	absent
TBF1990112008	21.3-m seine	-82.3758	27.8533	absent
TBF1990112009	21.3-m seine	-82.3758	27.8533	absent
TBF1990112010	21.3-m seine	-82.3758	27.8533	absent
TBF1990112011	21.3-m seine	-82.3758	27.8533	absent
TBF1990112012	21.3-m seine	-82.3758	27.8533	absent
TBF1990112013	21.3-m seine	-82.3758	27.8533	absent
TBF1990121907	21.3-m seine	-82.4262	27.6688	absent
TBF1990121908	21.3-m seine	-82.4262	27.6688	absent
TBF1990121909	21.3-m seine	-82.4518	27.6908	absent
TBF1990121910	21.3-m seine	-82.4518	27.6908	absent
TBF1990121911	21.3-m seine	-82.4518	27.6908	absent
TBF1990121912	21.3-m seine	-82.4262	27.6688	absent
TBF1990121913	21.3-m seine	-82.4518	27.6908	absent
TBF1990121914	21.3-m seine	-82.4518	27.6908	absent
TBF1990121915	21.3-m seine	-82.4518	27.6908	absent
TBF1990122001	21.3-m seine	-82.3758	27.8533	absent
TBF1990122002	21.3-m seine	-82.3758	27.8533	absent
TBF1990122003	21.3-m seine	-82.3758	27.8533	absent
TBF1990122004	21.3-m seine	-82.3758	27.8533	absent
TBF1990122005	21.3-m seine	-82.3758	27.8533	absent
TBF1990122006	21.3-m seine	-82.3758	27.8533	absent
TBF1990122007	21.3-m seine	-82.3758	27.8533	absent
TBF1990122008	21.3-m seine	-82.3758	27.8533	absent
TBF1990122009	21.3-m seine	-82.3913	27.8595	absent
TBF1990122010	21.3-m seine	-82.3913	27.8595	absent
TBF1991012407	21.3-m seine	-82.4262	27.6688	absent
TBF1991012408	21.3-m seine	-82.4262	27.6688	absent
TBF1991012409	21.3-m seine	-82.4262	27.6688	absent
TBF1991012410	21.3-m seine	-82.4518	27.6908	absent
TBF1991012411	21.3-m seine	-82.4518	27.6908	absent
TBF1991012412	21.3-m seine	-82.4518	27.6908	absent
TBF1991012413	21.3-m seine	-82.4518	27.6908	absent
TBF1991012414	21.3-m seine	-82.4518	27.6908	absent
TBF1991012415	21.3-m seine	-82.4518	27.6908	absent
TBF1991012501	21.3-m seine	-82.3913	27.8595	absent
TBF1991012502	21.3-m seine	-82.3913	27.8595	absent
TBF1991012503	21.3-m seine	-82.3758	27.8533	absent
TBF1991012504	21.3-m seine	-82.3758	27.8533	absent
TBF1991012505	21.3-m seine	-82.3758	27.8533	absent
TBF1991012506	21.3-m seine	-82.3758	27.8533	absent
TBF1991012507	21.3-m seine	-82.3758	27.8533	absent
TBF1991012508	21.3-m seine	-82.3758	27.8533	absent
TBF1991012509	21.3-m seine	-82.3758	27.8533	absent
TBF1991012510	21.3-m seine	-82.3758	27.8533	absent
TBF1991022107	21.3-m seine	-82.4262	27.6688	absent
TBF1991022108	21.3-m seine	-82.4262	27.6688	absent
TBF1991022109	21.3-m seine	-82.4262	27.6688	absent
TBF1991022110	21.3-m seine	-82.4518	27.6908	absent
TBF1991022111	21.3-m seine	-82.4518	27.6908	absent
TBF1991022112	21.3-m seine	-82.4518	27.6908	absent
TBF1991022113	21.3-m seine	-82.4518	27.6908	absent
TBF1991022114	21.3-m seine	-82.4518	27.6908	absent
TBF1991022115	21.3-m seine	-82.4518	27.6908	absent
TBF1991022204	21.3-m seine	-82.3758	27.8533	absent
TBF1991022205	21.3-m seine	-82.3758	27.8533	absent
TBF1991022206	21.3-m seine	-82.3758	27.8533	absent
TBF1991022207	21.3-m seine	-82.3758	27.8533	absent
TBF1991022208	21.3-m seine	-82.3758	27.8533	absent
TBF1991022209	21.3-m seine	-82.3758	27.8533	absent
TBF1991022210	21.3-m seine	-82.3758	27.8533	absent
TBF1991022211	21.3-m seine	-82.3758	27.8533	absent
TBF1991022212	21.3-m seine	-82.3913	27.8595	absent
TBF1991022213	21.3-m seine	-82.3913	27.8595	absent
TBF1991032107	21.3-m seine	-82.4262	27.6688	absent
TBF1991032108	21.3-m seine	-82.4262	27.6688	absent
TBF1991032109	21.3-m seine	-82.4262	27.6688	absent
TBF1991032110	21.3-m seine	-82.4518	27.6908	absent
TBF1991032111	21.3-m seine	-82.4518	27.6908	absent
TBF1991032112	21.3-m seine	-82.4518	27.6908	absent
TBF1991032113	21.3-m seine	-82.4518	27.6908	absent
TBF1991032114	21.3-m seine	-82.4518	27.6908	absent
TBF1991032115	21.3-m seine	-82.4518	27.6908	absent
TBF1991032201	21.3-m seine	-82.3758	27.8533	absent
TBF1991032202	21.3-m seine	-82.3758	27.8533	absent
TBF1991032203	21.3-m seine	-82.3758	27.8533	absent
TBF1991032204	21.3-m seine	-82.3758	27.8533	absent
TBF1991032205	21.3-m seine	-82.3758	27.8533	absent
TBF1991032206	21.3-m seine	-82.3758	27.8533	absent
TBF1991032207	21.3-m seine	-82.3758	27.8533	absent
TBF1991032208	21.3-m seine	-82.3758	27.8533	absent
TBF1991032212	21.3-m seine	-82.3913	27.8595	absent
TBF1991032213	21.3-m seine	-82.3913	27.8595	absent
TBF1991042501	21.3-m seine	-82.3913	27.8595	absent
TBF1991042502	21.3-m seine	-82.3913	27.8595	absent
TBF1991042503	21.3-m seine	-82.3913	27.8595	absent
TBF1991042504	21.3-m seine	-82.3913	27.8595	absent
TBF1991042508	21.3-m seine	-82.3758	27.8533	absent
TBF1991042509	21.3-m seine	-82.3758	27.8533	absent
TBF1991042510	21.3-m seine	-82.3758	27.8533	absent
TBF1991042511	21.3-m seine	-82.3758	27.8533	absent
TBF1991042512	21.3-m seine	-82.3758	27.8533	absent
TBF1991042513	21.3-m seine	-82.3758	27.8533	absent
TBF1991042514	21.3-m seine	-82.3758	27.8533	absent
TBF1991042515	21.3-m seine	-82.3758	27.8533	absent
TBF1991042601	21.3-m seine	-82.4518	27.6908	absent
TBF1991042602	21.3-m seine	-82.4518	27.6908	absent
TBF1991042603	21.3-m seine	-82.4518	27.6908	absent
TBF1991042604	21.3-m seine	-82.4518	27.6908	absent
TBF1991042605	21.3-m seine	-82.4518	27.6908	absent
TBF1991042606	21.3-m seine	-82.4518	27.6908	absent
TBF1991042613	21.3-m seine	-82.4262	27.6688	absent
TBF1991042614	21.3-m seine	-82.4262	27.6688	absent
TBF1991042615	21.3-m seine	-82.4262	27.6688	absent
TBF1991052201	21.3-m seine	-82.3913	27.8595	absent
TBF1991052202	21.3-m seine	-82.3913	27.8595	absent
TBF1991052203	21.3-m seine	-82.3913	27.8595	absent
TBF1991052204	21.3-m seine	-82.3913	27.8595	absent
TBF1991052205	21.3-m seine	-82.3758	27.8533	absent
TBF1991052206	21.3-m seine	-82.3758	27.8533	absent
TBF1991052207	21.3-m seine	-82.3758	27.8533	absent
TBF1991052208	21.3-m seine	-82.3758	27.8533	absent
TBF1991052209	21.3-m seine	-82.3758	27.8533	absent
TBF1991052210	21.3-m seine	-82.3758	27.8533	absent
TBF1991052211	21.3-m seine	-82.3758	27.8533	absent
TBF1991052212	21.3-m seine	-82.3758	27.8533	absent
TBF1991052407	21.3-m seine	-82.4262	27.6688	absent
TBF1991052408	21.3-m seine	-82.4262	27.6688	absent
TBF1991052409	21.3-m seine	-82.4262	27.6688	absent
TBF1991052410	21.3-m seine	-82.4518	27.6908	absent
TBF1991052411	21.3-m seine	-82.4518	27.6908	absent
TBF1991052412	21.3-m seine	-82.4518	27.6908	absent
TBF1991052413	21.3-m seine	-82.4518	27.6908	absent
TBF1991052801	21.3-m seine	-82.4518	27.6908	absent
TBF1991052802	21.3-m seine	-82.4518	27.6908	absent
TBF1991061801	21.3-m seine	-82.4262	27.6688	absent
TBF1991061802	21.3-m seine	-82.4262	27.6688	absent
TBF1991061803	21.3-m seine	-82.4262	27.6688	absent
TBF1991061810	21.3-m seine	-82.4518	27.6908	absent
TBF1991061811	21.3-m seine	-82.4518	27.6908	absent
TBF1991061812	21.3-m seine	-82.4518	27.6908	absent
TBF1991061813	21.3-m seine	-82.4518	27.6908	absent
TBF1991061814	21.3-m seine	-82.4518	27.6908	absent
TBF1991061815	21.3-m seine	-82.4518	27.6908	absent
TBF1991062004	21.3-m seine	-82.3758	27.8533	absent
TBF1991062005	21.3-m seine	-82.3758	27.8533	absent
TBF1991062006	21.3-m seine	-82.3758	27.8533	absent
TBF1991062007	21.3-m seine	-82.3758	27.8533	absent
TBF1991062008	21.3-m seine	-82.3758	27.8533	absent
TBF1991062009	21.3-m seine	-82.3758	27.8533	absent
TBF1991062010	21.3-m seine	-82.3758	27.8533	absent
TBF1991062011	21.3-m seine	-82.3758	27.8533	absent
TBF1991062012	21.3-m seine	-82.3913	27.8595	absent
TBF1991062013	21.3-m seine	-82.3913	27.8595	absent
TBF1991072201	21.3-m seine	-82.3913	27.8595	absent
TBF1991072202	21.3-m seine	-82.3913	27.8595	absent
TBF1991072203	21.3-m seine	-82.3913	27.8595	absent
TBF1991072204	21.3-m seine	-82.3913	27.8595	absent
TBF1991072205	21.3-m seine	-82.3758	27.8533	absent
TBF1991072206	21.3-m seine	-82.3758	27.8533	absent
TBF1991072207	21.3-m seine	-82.3758	27.8533	absent
TBF1991072208	21.3-m seine	-82.3758	27.8533	absent
TBF1991072209	21.3-m seine	-82.3758	27.8533	absent
TBF1991072210	21.3-m seine	-82.3758	27.8533	absent
TBF1991072211	21.3-m seine	-82.3758	27.8533	absent
TBF1991072212	21.3-m seine	-82.3758	27.8533	absent
TBF1991072301	21.3-m seine	-82.4518	27.6908	absent
TBF1991072302	21.3-m seine	-82.4518	27.6908	absent
TBF1991072303	21.3-m seine	-82.4518	27.6908	absent
TBF1991072304	21.3-m seine	-82.4518	27.6908	absent
TBF1991072305	21.3-m seine	-82.4518	27.6908	absent
TBF1991072306	21.3-m seine	-82.4518	27.6908	absent
TBF1991072313	21.3-m seine	-82.4262	27.6688	absent
TBF1991072314	21.3-m seine	-82.4262	27.6688	absent
TBF1991072315	21.3-m seine	-82.4262	27.6688	absent
TBF1991082001	21.3-m seine	-82.4518	27.6908	absent
TBF1991082002	21.3-m seine	-82.4518	27.6908	absent
TBF1991082003	21.3-m seine	-82.4518	27.6908	absent
TBF1991082004	21.3-m seine	-82.4518	27.6908	absent
TBF1991082005	21.3-m seine	-82.4518	27.6908	absent
TBF1991082006	21.3-m seine	-82.4518	27.6908	absent
TBF1991082013	21.3-m seine	-82.4262	27.6688	absent
TBF1991082014	21.3-m seine	-82.4262	27.6688	absent
TBF1991082015	21.3-m seine	-82.4262	27.6688	absent
TBF1991082201	21.3-m seine	-82.3913	27.8595	absent
TBF1991082202	21.3-m seine	-82.3913	27.8595	absent
TBF1991082203	21.3-m seine	-82.3913	27.8595	absent
TBF1991082204	21.3-m seine	-82.3913	27.8595	absent
TBF1991082208	21.3-m seine	-82.3758	27.8533	absent
TBF1991082209	21.3-m seine	-82.3758	27.8533	absent
TBF1991082210	21.3-m seine	-82.3758	27.8533	absent
TBF1991082211	21.3-m seine	-82.3758	27.8533	absent
TBF1991082212	21.3-m seine	-82.3758	27.8533	absent
TBF1991082213	21.3-m seine	-82.3758	27.8533	absent
TBF1991082214	21.3-m seine	-82.3758	27.8533	absent
TBF1991082215	21.3-m seine	-82.3758	27.8533	absent
TBF1991091701	21.3-m seine	-82.3758	27.8533	absent
TBF1991091702	21.3-m seine	-82.3758	27.8533	absent
TBF1991091703	21.3-m seine	-82.3758	27.8533	absent
TBF1991091704	21.3-m seine	-82.3758	27.8533	absent
TBF1991091705	21.3-m seine	-82.3758	27.8533	absent
TBF1991091706	21.3-m seine	-82.3758	27.8533	absent
TBF1991091707	21.3-m seine	-82.3758	27.8533	absent
TBF1991091708	21.3-m seine	-82.3758	27.8533	absent
TBF1991091712	21.3-m seine	-82.3913	27.8595	absent
TBF1991091713	21.3-m seine	-82.3913	27.8595	absent
TBF1991091714	21.3-m seine	-82.3913	27.8595	absent
TBF1991091715	21.3-m seine	-82.3913	27.8595	absent
TBF1991091907	21.3-m seine	-82.4262	27.6688	absent
TBF1991091908	21.3-m seine	-82.4262	27.6688	absent
TBF1991091909	21.3-m seine	-82.4262	27.6688	absent
TBF1991091910	21.3-m seine	-82.4518	27.6908	absent
TBF1991091911	21.3-m seine	-82.4518	27.6908	absent
TBF1991091912	21.3-m seine	-82.4518	27.6908	absent
TBF1991091913	21.3-m seine	-82.4518	27.6908	absent
TBF1991091914	21.3-m seine	-82.4518	27.6908	absent
TBF1991091915	21.3-m seine	-82.4518	27.6908	absent
TBF1991102201	21.3-m seine	-82.4262	27.6688	absent
TBF1991102202	21.3-m seine	-82.4262	27.6688	absent
TBF1991102203	21.3-m seine	-82.4262	27.6688	absent
TBF1991102210	21.3-m seine	-82.4518	27.6908	absent
TBF1991102211	21.3-m seine	-82.4518	27.6908	absent
TBF1991102212	21.3-m seine	-82.4518	27.6908	absent
TBF1991102213	21.3-m seine	-82.4518	27.6908	absent
TBF1991102214	21.3-m seine	-82.4518	27.6908	absent
TBF1991102215	21.3-m seine	-82.4518	27.6908	absent
TBF1991102401	21.3-m seine	-82.3913	27.8595	absent
TBF1991102402	21.3-m seine	-82.3913	27.8595	absent
TBF1991102403	21.3-m seine	-82.3913	27.8595	absent
TBF1991102404	21.3-m seine	-82.3913	27.8595	absent
TBF1991102408	21.3-m seine	-82.3758	27.8533	absent
TBF1991102409	21.3-m seine	-82.3758	27.8533	absent
TBF1991102410	21.3-m seine	-82.3758	27.8533	absent
TBF1991102411	21.3-m seine	-82.3758	27.8533	absent
TBF1991102412	21.3-m seine	-82.3758	27.8533	absent
TBF1991102413	21.3-m seine	-82.3758	27.8533	absent
TBF1991102414	21.3-m seine	-82.3758	27.8533	absent
TBF1991102415	21.3-m seine	-82.3758	27.8533	absent
TBF1991112104	21.3-m seine	-82.3758	27.8533	absent
TBF1991112105	21.3-m seine	-82.3758	27.8533	absent
TBF1991112106	21.3-m seine	-82.3758	27.8533	absent
TBF1991112107	21.3-m seine	-82.3758	27.8533	absent
TBF1991112108	21.3-m seine	-82.3758	27.8533	absent
TBF1991112109	21.3-m seine	-82.3758	27.8533	absent
TBF1991112110	21.3-m seine	-82.3758	27.8533	absent
TBF1991112111	21.3-m seine	-82.3758	27.8533	absent
TBF1991112112	21.3-m seine	-82.3913	27.8595	absent
TBF1991112113	21.3-m seine	-82.3913	27.8595	absent
TBF1991112114	21.3-m seine	-82.3913	27.8595	absent
TBF1991112115	21.3-m seine	-82.3913	27.8595	absent
TBF1991112204	21.3-m seine	-82.4262	27.6688	absent
TBF1991112205	21.3-m seine	-82.4262	27.6688	absent
TBF1991112206	21.3-m seine	-82.4262	27.6688	absent
TBF1991112210	21.3-m seine	-82.4518	27.6908	absent
TBF1991112211	21.3-m seine	-82.4518	27.6908	absent
TBF1991112212	21.3-m seine	-82.4518	27.6908	absent
TBF1991112213	21.3-m seine	-82.4518	27.6908	absent
TBF1991112214	21.3-m seine	-82.4518	27.6908	absent
TBF1991112215	21.3-m seine	-82.4518	27.6908	absent
TBF1991122704	21.3-m seine	-82.4262	27.6688	absent
TBF1991122705	21.3-m seine	-82.4262	27.6688	absent
TBF1991122706	21.3-m seine	-82.4262	27.6688	absent
TBF1991122707	21.3-m seine	-82.4518	27.6908	absent
TBF1991122708	21.3-m seine	-82.4518	27.6908	absent
TBF1991122709	21.3-m seine	-82.4518	27.6908	absent
TBF1991122710	21.3-m seine	-82.4518	27.6908	absent
TBF1991122711	21.3-m seine	-82.4518	27.6908	absent
TBF1991122712	21.3-m seine	-82.4518	27.6908	absent
TBF1991123001	21.3-m seine	-82.3913	27.8595	absent
TBF1991123002	21.3-m seine	-82.3913	27.8595	absent
TBF1991123003	21.3-m seine	-82.3913	27.8595	absent
TBF1991123004	21.3-m seine	-82.3913	27.8595	absent
TBF1991123005	21.3-m seine	-82.3758	27.8533	absent
TBF1991123006	21.3-m seine	-82.3758	27.8533	absent
TBF1991123007	21.3-m seine	-82.3758	27.8533	absent
TBF1991123008	21.3-m seine	-82.3758	27.8533	absent
TBF1991123009	21.3-m seine	-82.3758	27.8533	absent
TBF1991123010	21.3-m seine	-82.3758	27.8533	absent
TBF1991123011	21.3-m seine	-82.3758	27.8533	absent
TBF1991123012	21.3-m seine	-82.3758	27.8533	absent
TBF1992012304	21.3-m seine	-82.4262	27.6688	absent
TBF1992012305	21.3-m seine	-82.4262	27.6688	absent
TBF1992012306	21.3-m seine	-82.4262	27.6688	absent
TBF1992012310	21.3-m seine	-82.4518	27.6908	absent
TBF1992012311	21.3-m seine	-82.4518	27.6908	absent
TBF1992012312	21.3-m seine	-82.4518	27.6908	absent
TBF1992012313	21.3-m seine	-82.4518	27.6908	absent
TBF1992012314	21.3-m seine	-82.4518	27.6908	absent
TBF1992012315	21.3-m seine	-82.4518	27.6908	absent
TBF1992012401	21.3-m seine	-82.3758	27.8533	absent
TBF1992012402	21.3-m seine	-82.3758	27.8533	absent
TBF1992012403	21.3-m seine	-82.3758	27.8533	absent
TBF1992012404	21.3-m seine	-82.3758	27.8533	absent
TBF1992012405	21.3-m seine	-82.3758	27.8533	absent
TBF1992012406	21.3-m seine	-82.3758	27.8533	absent
TBF1992012407	21.3-m seine	-82.3758	27.8533	absent
TBF1992012408	21.3-m seine	-82.3758	27.8533	absent
TBF1992012412	21.3-m seine	-82.3758	27.8533	absent
TBF1992012413	21.3-m seine	-82.3758	27.8533	absent
TBF1992012414	21.3-m seine	-82.3758	27.8533	absent
TBF1992012415	21.3-m seine	-82.3758	27.8533	absent
TBF1992021701	21.3-m seine	-82.4262	27.6688	absent
TBF1992021702	21.3-m seine	-82.4262	27.6688	absent
TBF1992021703	21.3-m seine	-82.4262	27.6688	absent
TBF1992021710	21.3-m seine	-82.4518	27.6908	absent
TBF1992021711	21.3-m seine	-82.4518	27.6908	absent
TBF1992021712	21.3-m seine	-82.4518	27.6908	absent
TBF1992021713	21.3-m seine	-82.4518	27.6908	absent
TBF1992021714	21.3-m seine	-82.4518	27.6908	absent
TBF1992021715	21.3-m seine	-82.4518	27.6908	absent
TBF1992022001	21.3-m seine	-82.3913	27.8595	absent
TBF1992022002	21.3-m seine	-82.3913	27.8595	absent
TBF1992022003	21.3-m seine	-82.3913	27.8595	absent
TBF1992022004	21.3-m seine	-82.3913	27.8595	absent
TBF1992022008	21.3-m seine	-82.3758	27.8533	absent
TBF1992022009	21.3-m seine	-82.3758	27.8533	absent
TBF1992022010	21.3-m seine	-82.3758	27.8533	absent
TBF1992022011	21.3-m seine	-82.3758	27.8533	absent
TBF1992022012	21.3-m seine	-82.3758	27.8533	absent
TBF1992022013	21.3-m seine	-82.3758	27.8533	absent
TBF1992022014	21.3-m seine	-82.3758	27.8533	absent
TBF1992022015	21.3-m seine	-82.3758	27.8533	absent
TBF1992031901	21.3-m seine	-82.4262	27.6688	absent
TBF1992031902	21.3-m seine	-82.4262	27.6688	absent
TBF1992031903	21.3-m seine	-82.4262	27.6688	absent
TBF1992031910	21.3-m seine	-82.4518	27.6908	absent
TBF1992031911	21.3-m seine	-82.4518	27.6908	absent
TBF1992031912	21.3-m seine	-82.4518	27.6908	absent
TBF1992031913	21.3-m seine	-82.4518	27.6908	absent
TBF1992031914	21.3-m seine	-82.4518	27.6908	absent
TBF1992031915	21.3-m seine	-82.4518	27.6908	absent
TBF1992032301	21.3-m seine	-82.3913	27.8595	absent
TBF1992032302	21.3-m seine	-82.3913	27.8595	absent
TBF1992032303	21.3-m seine	-82.3913	27.8595	absent
TBF1992032304	21.3-m seine	-82.3913	27.8595	absent
TBF1992032305	21.3-m seine	-82.3758	27.8533	absent
TBF1992032306	21.3-m seine	-82.3758	27.8533	absent
TBF1992032307	21.3-m seine	-82.3758	27.8533	absent
TBF1992032308	21.3-m seine	-82.3758	27.8533	absent
TBF1992032309	21.3-m seine	-82.3758	27.8533	absent
TBF1992032310	21.3-m seine	-82.3758	27.8533	absent
TBF1992032311	21.3-m seine	-82.3758	27.8533	absent
TBF1992032312	21.3-m seine	-82.3758	27.8533	absent
TBF1992042001	21.3-m seine	-82.3913	27.8595	absent
TBF1992042002	21.3-m seine	-82.3913	27.8595	absent
TBF1992042003	21.3-m seine	-82.3913	27.8595	absent
TBF1992042004	21.3-m seine	-82.3913	27.8595	absent
TBF1992042008	21.3-m seine	-82.3758	27.8533	absent
TBF1992042009	21.3-m seine	-82.3758	27.8533	absent
TBF1992042010	21.3-m seine	-82.3758	27.8533	absent
TBF1992042011	21.3-m seine	-82.3758	27.8533	absent
TBF1992042012	21.3-m seine	-82.3758	27.8533	absent
TBF1992042013	21.3-m seine	-82.3758	27.8533	absent
TBF1992042014	21.3-m seine	-82.3758	27.8533	absent
TBF1992042015	21.3-m seine	-82.3758	27.8533	absent
TBF1992042301	21.3-m seine	-82.4518	27.6908	absent
TBF1992042302	21.3-m seine	-82.4518	27.6908	absent
TBF1992042303	21.3-m seine	-82.4518	27.6908	absent
TBF1992042304	21.3-m seine	-82.4518	27.6908	absent
TBF1992042305	21.3-m seine	-82.4518	27.6908	absent
TBF1992042306	21.3-m seine	-82.4518	27.6908	absent
TBF1992042307	21.3-m seine	-82.4262	27.6688	absent
TBF1992042308	21.3-m seine	-82.4262	27.6688	absent
TBF1992042309	21.3-m seine	-82.4262	27.6688	absent
TBF1992052001	21.3-m seine	-82.4518	27.6908	absent
TBF1992052002	21.3-m seine	-82.4518	27.6908	absent
TBF1992052003	21.3-m seine	-82.4518	27.6908	absent
TBF1992052004	21.3-m seine	-82.4518	27.6908	absent
TBF1992052005	21.3-m seine	-82.4518	27.6908	absent
TBF1992052006	21.3-m seine	-82.4518	27.6908	absent
TBF1992052007	21.3-m seine	-82.4262	27.6688	absent
TBF1992052008	21.3-m seine	-82.4262	27.6688	absent
TBF1992052009	21.3-m seine	-82.4262	27.6688	absent
TBF1992052101	21.3-m seine	-82.3913	27.8595	absent
TBF1992052102	21.3-m seine	-82.3913	27.8595	absent
TBF1992052103	21.3-m seine	-82.3913	27.8595	absent
TBF1992052105	21.3-m seine	-82.3913	27.8595	absent
TBF1992052106	21.3-m seine	-82.3758	27.8533	absent
TBF1992052107	21.3-m seine	-82.3758	27.8533	absent
TBF1992052108	21.3-m seine	-82.3758	27.8533	absent
TBF1992052109	21.3-m seine	-82.3758	27.8533	absent
TBF1992052110	21.3-m seine	-82.3758	27.8533	absent
TBF1992052111	21.3-m seine	-82.3758	27.8533	absent
TBF1992052112	21.3-m seine	-82.3758	27.8533	absent
TBF1992052113	21.3-m seine	-82.3758	27.8533	absent
TBF1992062301	21.3-m seine	-82.3758	27.8533	absent
TBF1992062302	21.3-m seine	-82.3758	27.8533	absent
TBF1992062303	21.3-m seine	-82.3758	27.8533	absent
TBF1992062304	21.3-m seine	-82.3758	27.8533	absent
TBF1992062305	21.3-m seine	-82.3758	27.8533	absent
TBF1992062306	21.3-m seine	-82.3758	27.8533	absent
TBF1992062307	21.3-m seine	-82.3758	27.8533	absent
TBF1992062308	21.3-m seine	-82.3758	27.8533	absent
TBF1992062312	21.3-m seine	-82.3913	27.8595	absent
TBF1992062313	21.3-m seine	-82.3913	27.8595	absent
TBF1992062314	21.3-m seine	-82.3913	27.8595	absent
TBF1992062315	21.3-m seine	-82.3913	27.8595	absent
TBF1992062401	21.3-m seine	-82.4518	27.6908	absent
TBF1992062402	21.3-m seine	-82.4518	27.6908	absent
TBF1992062403	21.3-m seine	-82.4518	27.6908	absent
TBF1992062404	21.3-m seine	-82.4518	27.6908	absent
TBF1992062405	21.3-m seine	-82.4518	27.6908	absent
TBF1992062406	21.3-m seine	-82.4518	27.6908	absent
TBF1992062413	21.3-m seine	-82.4262	27.6688	absent
TBF1992062414	21.3-m seine	-82.4262	27.6688	absent
TBF1992062415	21.3-m seine	-82.4262	27.6688	absent
TBF1992072101	21.3-m seine	-82.3758	27.8533	absent
TBF1992072102	21.3-m seine	-82.3758	27.8533	absent
TBF1992072103	21.3-m seine	-82.3758	27.8533	absent
TBF1992072104	21.3-m seine	-82.3758	27.8533	absent
TBF1992072105	21.3-m seine	-82.3758	27.8533	absent
TBF1992072106	21.3-m seine	-82.3758	27.8533	absent
TBF1992072107	21.3-m seine	-82.3758	27.8533	absent
TBF1992072108	21.3-m seine	-82.3758	27.8533	absent
TBF1992072112	21.3-m seine	-82.3913	27.8595	absent
TBF1992072113	21.3-m seine	-82.3913	27.8595	absent
TBF1992072114	21.3-m seine	-82.3913	27.8595	absent
TBF1992072115	21.3-m seine	-82.3913	27.8595	absent
TBF1992072201	21.3-m seine	-82.4262	27.6688	absent
TBF1992072202	21.3-m seine	-82.4262	27.6688	absent
TBF1992072203	21.3-m seine	-82.4262	27.6688	absent
TBF1992072210	21.3-m seine	-82.4518	27.6908	absent
TBF1992072211	21.3-m seine	-82.4518	27.6908	absent
TBF1992072212	21.3-m seine	-82.4518	27.6908	absent
TBF1992072213	21.3-m seine	-82.4518	27.6908	absent
TBF1992072214	21.3-m seine	-82.4518	27.6908	absent
TBF1992072215	21.3-m seine	-82.4518	27.6908	absent
TBF1992081704	21.3-m seine	-82.3758	27.8533	absent
TBF1992081705	21.3-m seine	-82.3758	27.8533	absent
TBF1992081706	21.3-m seine	-82.3758	27.8533	absent
TBF1992081707	21.3-m seine	-82.3758	27.8533	absent
TBF1992081708	21.3-m seine	-82.3758	27.8533	absent
TBF1992081709	21.3-m seine	-82.3758	27.8533	absent
TBF1992081710	21.3-m seine	-82.3758	27.8533	absent
TBF1992081711	21.3-m seine	-82.3758	27.8533	absent
TBF1992081712	21.3-m seine	-82.3913	27.8595	absent
TBF1992081713	21.3-m seine	-82.3913	27.8595	absent
TBF1992081714	21.3-m seine	-82.3913	27.8595	absent
TBF1992081715	21.3-m seine	-82.3913	27.8595	absent
TBF1992081801	21.3-m seine	-82.4262	27.6688	absent
TBF1992081802	21.3-m seine	-82.4262	27.6688	absent
TBF1992081803	21.3-m seine	-82.4262	27.6688	absent
TBF1992081810	21.3-m seine	-82.4518	27.6908	absent
TBF1992081811	21.3-m seine	-82.4518	27.6908	absent
TBF1992081812	21.3-m seine	-82.4518	27.6908	absent
TBF1992081813	21.3-m seine	-82.4518	27.6908	absent
TBF1992081814	21.3-m seine	-82.4518	27.6908	absent
TBF1992081815	21.3-m seine	-82.4518	27.6908	absent
TBF1992092101	21.3-m seine	-82.4518	27.6908	absent
TBF1992092102	21.3-m seine	-82.4518	27.6908	absent
TBF1992092103	21.3-m seine	-82.4518	27.6908	absent
TBF1992092104	21.3-m seine	-82.4518	27.6908	absent
TBF1992092105	21.3-m seine	-82.4518	27.6908	absent
TBF1992092106	21.3-m seine	-82.4518	27.6908	absent
TBF1992092107	21.3-m seine	-82.4262	27.6688	absent
TBF1992092108	21.3-m seine	-82.4262	27.6688	absent
TBF1992092109	21.3-m seine	-82.4262	27.6688	absent
TBF1992092204	21.3-m seine	-82.3758	27.8533	absent
TBF1992092205	21.3-m seine	-82.3758	27.8533	absent
TBF1992092206	21.3-m seine	-82.3758	27.8533	absent
TBF1992092207	21.3-m seine	-82.3758	27.8533	absent
TBF1992092208	21.3-m seine	-82.3758	27.8533	absent
TBF1992092209	21.3-m seine	-82.3758	27.8533	absent
TBF1992092210	21.3-m seine	-82.3758	27.8533	absent
TBF1992092211	21.3-m seine	-82.3758	27.8533	absent
TBF1992092212	21.3-m seine	-82.3913	27.8595	absent
TBF1992092213	21.3-m seine	-82.3913	27.8595	absent
TBF1992092214	21.3-m seine	-82.3913	27.8595	absent
TBF1992092215	21.3-m seine	-82.3913	27.8595	absent
TBF1992102101	21.3-m seine	-82.3758	27.8533	absent
TBF1992102102	21.3-m seine	-82.3758	27.8533	absent
TBF1992102103	21.3-m seine	-82.3758	27.8533	absent
TBF1992102104	21.3-m seine	-82.3758	27.8533	absent
TBF1992102105	21.3-m seine	-82.3758	27.8533	absent
TBF1992102106	21.3-m seine	-82.3758	27.8533	absent
TBF1992102107	21.3-m seine	-82.3758	27.8533	absent
TBF1992102108	21.3-m seine	-82.3758	27.8533	absent
TBF1992102112	21.3-m seine	-82.3913	27.8595	absent
TBF1992102113	21.3-m seine	-82.3913	27.8595	absent
TBF1992102114	21.3-m seine	-82.3913	27.8595	absent
TBF1992102115	21.3-m seine	-82.3913	27.8595	absent
TBF1992102201	21.3-m seine	-82.4518	27.6908	absent
TBF1992102202	21.3-m seine	-82.4518	27.6908	absent
TBF1992102203	21.3-m seine	-82.4518	27.6908	absent
TBF1992102204	21.3-m seine	-82.4518	27.6908	absent
TBF1992102205	21.3-m seine	-82.4518	27.6908	absent
TBF1992102206	21.3-m seine	-82.4518	27.6908	absent
TBF1992102213	21.3-m seine	-82.4262	27.6688	absent
TBF1992102214	21.3-m seine	-82.4262	27.6688	absent
TBF1992102215	21.3-m seine	-82.4262	27.6688	absent
TBF1992111801	21.3-m seine	-82.4518	27.6908	absent
TBF1992111802	21.3-m seine	-82.4518	27.6908	absent
TBF1992111803	21.3-m seine	-82.4518	27.6908	absent
TBF1992111804	21.3-m seine	-82.4518	27.6908	absent
TBF1992111805	21.3-m seine	-82.4518	27.6908	absent
TBF1992111806	21.3-m seine	-82.4518	27.6908	absent
TBF1992111813	21.3-m seine	-82.4262	27.6688	absent
TBF1992111814	21.3-m seine	-82.4262	27.6688	absent
TBF1992111815	21.3-m seine	-82.4262	27.6688	absent
TBF1992111904	21.3-m seine	-82.3758	27.8533	absent
TBF1992111905	21.3-m seine	-82.3758	27.8533	absent
TBF1992111906	21.3-m seine	-82.3758	27.8533	absent
TBF1992111907	21.3-m seine	-82.3758	27.8533	absent
TBF1992111908	21.3-m seine	-82.3758	27.8533	absent
TBF1992111909	21.3-m seine	-82.3758	27.8533	absent
TBF1992111910	21.3-m seine	-82.3758	27.8533	absent
TBF1992111911	21.3-m seine	-82.3758	27.8533	absent
TBF1992111912	21.3-m seine	-82.3913	27.8595	absent
TBF1992111913	21.3-m seine	-82.3913	27.8595	absent
TBF1992111914	21.3-m seine	-82.3913	27.8595	absent
TBF1992111915	21.3-m seine	-82.3913	27.8595	absent
TBF1992122101	21.3-m seine	-82.3913	27.8595	absent
TBF1992122102	21.3-m seine	-82.3913	27.8595	absent
TBF1992122103	21.3-m seine	-82.3913	27.8595	absent
TBF1992122104	21.3-m seine	-82.3913	27.8595	absent
TBF1992122108	21.3-m seine	-82.3758	27.8533	absent
TBF1992122109	21.3-m seine	-82.3758	27.8533	absent
TBF1992122110	21.3-m seine	-82.3758	27.8533	absent
TBF1992122111	21.3-m seine	-82.3758	27.8533	absent
TBF1992122112	21.3-m seine	-82.3758	27.8533	absent
TBF1992122113	21.3-m seine	-82.3758	27.8533	absent
TBF1992122114	21.3-m seine	-82.3758	27.8533	absent
TBF1992122115	21.3-m seine	-82.3758	27.8533	absent
TBF1992122201	21.3-m seine	-82.4518	27.6908	absent
TBF1992122202	21.3-m seine	-82.4518	27.6908	absent
TBF1992122203	21.3-m seine	-82.4518	27.6908	absent
TBF1992122204	21.3-m seine	-82.4518	27.6908	absent
TBF1992122205	21.3-m seine	-82.4518	27.6908	absent
TBF1992122206	21.3-m seine	-82.4518	27.6908	absent
TBF1992122213	21.3-m seine	-82.4262	27.6688	absent
TBF1992122214	21.3-m seine	-82.4262	27.6688	absent
TBF1992122215	21.3-m seine	-82.4262	27.6688	absent
TBF1993012001	21.3-m seine	-82.3913	27.8595	absent
TBF1993012002	21.3-m seine	-82.3913	27.8595	absent
TBF1993012003	21.3-m seine	-82.3913	27.8595	absent
TBF1993012004	21.3-m seine	-82.3913	27.8595	absent
TBF1993012008	21.3-m seine	-82.3758	27.8533	absent
TBF1993012009	21.3-m seine	-82.3758	27.8533	absent
TBF1993012010	21.3-m seine	-82.3758	27.8533	absent
TBF1993012011	21.3-m seine	-82.3758	27.8533	absent
TBF1993012012	21.3-m seine	-82.3758	27.8533	absent
TBF1993012013	21.3-m seine	-82.3758	27.8533	absent
TBF1993012014	21.3-m seine	-82.3758	27.8533	absent
TBF1993012015	21.3-m seine	-82.3758	27.8533	absent
TBF1993012101	21.3-m seine	-82.4518	27.6908	absent
TBF1993012102	21.3-m seine	-82.4518	27.6908	absent
TBF1993012103	21.3-m seine	-82.4518	27.6908	absent
TBF1993012109	21.3-m seine	-82.4262	27.6688	absent
TBF1993012111	21.3-m seine	-82.4262	27.6688	absent
TBF1993012112	21.3-m seine	-82.4262	27.6688	absent
TBF1993012113	21.3-m seine	-82.4262	27.6688	absent
TBF1993012114	21.3-m seine	-82.4262	27.6688	absent
TBF1993012115	21.3-m seine	-82.4262	27.6688	absent
TBF1993022501	21.3-m seine	-82.3913	27.8595	absent
TBF1993022502	21.3-m seine	-82.3913	27.8595	absent
TBF1993022503	21.3-m seine	-82.3913	27.8595	absent
TBF1993022504	21.3-m seine	-82.3913	27.8595	absent
TBF1993022508	21.3-m seine	-82.3758	27.8533	absent
TBF1993022509	21.3-m seine	-82.3758	27.8533	absent
TBF1993022510	21.3-m seine	-82.3758	27.8533	absent
TBF1993022511	21.3-m seine	-82.3758	27.8533	absent
TBF1993022512	21.3-m seine	-82.3758	27.8533	absent
TBF1993022513	21.3-m seine	-82.3758	27.8533	absent
TBF1993022514	21.3-m seine	-82.3758	27.8533	absent
TBF1993022515	21.3-m seine	-82.3758	27.8533	absent
TBF1993022601	21.3-m seine	-82.4518	27.6908	absent
TBF1993022602	21.3-m seine	-82.4518	27.6908	absent
TBF1993022603	21.3-m seine	-82.4518	27.6908	absent
TBF1993022604	21.3-m seine	-82.4518	27.6908	absent
TBF1993022605	21.3-m seine	-82.4518	27.6908	absent
TBF1993022606	21.3-m seine	-82.4518	27.6908	absent
TBF1993022613	21.3-m seine	-82.4262	27.6688	absent
TBF1993022614	21.3-m seine	-82.4262	27.6688	absent
TBF1993022615	21.3-m seine	-82.4262	27.6688	absent
TBF1993032401	21.3-m seine	-82.3913	27.8595	absent
TBF1993032402	21.3-m seine	-82.3913	27.8595	absent
TBF1993032403	21.3-m seine	-82.3913	27.8595	absent
TBF1993032404	21.3-m seine	-82.3913	27.8595	absent
TBF1993032405	21.3-m seine	-82.3758	27.8533	absent
TBF1993032406	21.3-m seine	-82.3758	27.8533	absent
TBF1993032407	21.3-m seine	-82.3758	27.8533	absent
TBF1993032408	21.3-m seine	-82.3758	27.8533	absent
TBF1993032409	21.3-m seine	-82.3758	27.8533	absent
TBF1993032410	21.3-m seine	-82.3758	27.8533	absent
TBF1993032411	21.3-m seine	-82.3758	27.8533	absent
TBF1993032412	21.3-m seine	-82.3758	27.8533	absent
TBF1993032501	21.3-m seine	-82.4518	27.6908	absent
TBF1993032502	21.3-m seine	-82.4518	27.6908	absent
TBF1993032503	21.3-m seine	-82.4518	27.6908	absent
TBF1993032504	21.3-m seine	-82.4518	27.6908	absent
TBF1993032505	21.3-m seine	-82.4518	27.6908	absent
TBF1993032506	21.3-m seine	-82.4518	27.6908	absent
TBF1993032507	21.3-m seine	-82.4262	27.6688	absent
TBF1993032508	21.3-m seine	-82.4262	27.6688	absent
TBF1993032509	21.3-m seine	-82.4262	27.6688	absent
TBF1993042101	21.3-m seine	-82.3913	27.8595	absent
TBF1993042102	21.3-m seine	-82.3913	27.8595	absent
TBF1993042103	21.3-m seine	-82.3913	27.8595	absent
TBF1993042104	21.3-m seine	-82.3913	27.8595	absent
TBF1993042105	21.3-m seine	-82.3758	27.8533	absent
TBF1993042106	21.3-m seine	-82.3758	27.8533	absent
TBF1993042107	21.3-m seine	-82.3758	27.8533	absent
TBF1993042108	21.3-m seine	-82.3758	27.8533	absent
TBF1993042109	21.3-m seine	-82.3758	27.8533	absent
TBF1993042110	21.3-m seine	-82.3758	27.8533	absent
TBF1993042111	21.3-m seine	-82.3758	27.8533	absent
TBF1993042112	21.3-m seine	-82.3758	27.8533	absent
TBF1993042204	21.3-m seine	-82.4262	27.6688	absent
TBF1993042205	21.3-m seine	-82.4262	27.6688	absent
TBF1993042206	21.3-m seine	-82.4262	27.6688	absent
TBF1993042210	21.3-m seine	-82.4518	27.6908	absent
TBF1993042211	21.3-m seine	-82.4518	27.6908	absent
TBF1993042212	21.3-m seine	-82.4518	27.6908	absent
TBF1993042213	21.3-m seine	-82.4518	27.6908	absent
TBF1993042214	21.3-m seine	-82.4518	27.6908	absent
TBF1993042215	21.3-m seine	-82.4518	27.6908	absent
TBF1993051801	21.3-m seine	-82.4518	27.6908	absent
TBF1993051802	21.3-m seine	-82.4518	27.6908	absent
TBF1993051803	21.3-m seine	-82.4518	27.6908	absent
TBF1993051804	21.3-m seine	-82.4518	27.6908	absent
TBF1993051805	21.3-m seine	-82.4518	27.6908	absent
TBF1993051806	21.3-m seine	-82.4518	27.6908	absent
TBF1993051807	21.3-m seine	-82.4262	27.6688	absent
TBF1993051808	21.3-m seine	-82.4262	27.6688	absent
TBF1993051809	21.3-m seine	-82.4262	27.6688	absent
TBF1993051901	21.3-m seine	-82.3913	27.8595	absent
TBF1993051902	21.3-m seine	-82.3913	27.8595	absent
TBF1993051903	21.3-m seine	-82.3913	27.8595	absent
TBF1993051904	21.3-m seine	-82.3913	27.8595	absent
TBF1993051905	21.3-m seine	-82.3758	27.8533	absent
TBF1993051906	21.3-m seine	-82.3758	27.8533	absent
TBF1993051907	21.3-m seine	-82.3758	27.8533	absent
TBF1993051908	21.3-m seine	-82.3758	27.8533	absent
TBF1993051909	21.3-m seine	-82.3758	27.8533	absent
TBF1993051910	21.3-m seine	-82.3758	27.8533	absent
TBF1993051911	21.3-m seine	-82.3758	27.8533	absent
TBF1993051912	21.3-m seine	-82.3758	27.8533	absent
TBF1993062107	21.3-m seine	-82.3913	27.8595	absent
TBF1993062108	21.3-m seine	-82.3913	27.8595	absent
TBF1993062109	21.3-m seine	-82.3913	27.8595	absent
TBF1993062110	21.3-m seine	-82.4518	27.6908	absent
TBF1993062111	21.3-m seine	-82.4518	27.6908	absent
TBF1993062112	21.3-m seine	-82.4518	27.6908	absent
TBF1993062113	21.3-m seine	-82.4518	27.6908	absent
TBF1993062114	21.3-m seine	-82.4518	27.6908	absent
TBF1993062115	21.3-m seine	-82.4518	27.6908	absent
TBF1993062401	21.3-m seine	-82.3913	27.8595	absent
TBF1993062402	21.3-m seine	-82.3913	27.8595	absent
TBF1993062403	21.3-m seine	-82.3913	27.8595	absent
TBF1993062404	21.3-m seine	-82.3913	27.8595	absent
TBF1993062408	21.3-m seine	-82.3758	27.8533	absent
TBF1993062409	21.3-m seine	-82.3758	27.8533	absent
TBF1993062410	21.3-m seine	-82.3758	27.8533	absent
TBF1993062411	21.3-m seine	-82.3758	27.8533	absent
TBF1993062412	21.3-m seine	-82.3758	27.8533	absent
TBF1993062413	21.3-m seine	-82.3758	27.8533	absent
TBF1993062414	21.3-m seine	-82.3758	27.8533	absent
TBF1993062415	21.3-m seine	-82.3758	27.8533	absent
TBF1993072001	21.3-m seine	-82.3758	27.8533	absent
TBF1993072002	21.3-m seine	-82.3758	27.8533	absent
TBF1993072003	21.3-m seine	-82.3758	27.8533	absent
TBF1993072004	21.3-m seine	-82.3758	27.8533	absent
TBF1993072005	21.3-m seine	-82.3758	27.8533	absent
TBF1993072006	21.3-m seine	-82.3758	27.8533	absent
TBF1993072007	21.3-m seine	-82.3758	27.8533	absent
TBF1993072008	21.3-m seine	-82.3758	27.8533	absent
TBF1993072012	21.3-m seine	-82.3913	27.8595	absent
TBF1993072013	21.3-m seine	-82.3913	27.8595	absent
TBF1993072014	21.3-m seine	-82.3913	27.8595	absent
TBF1993072015	21.3-m seine	-82.3913	27.8595	absent
TBF1993072101	21.3-m seine	-82.4262	27.6688	absent
TBF1993072102	21.3-m seine	-82.4262	27.6688	absent
TBF1993072103	21.3-m seine	-82.4262	27.6688	absent
TBF1993072110	21.3-m seine	-82.4518	27.6908	absent
TBF1993072111	21.3-m seine	-82.4518	27.6908	absent
TBF1993072112	21.3-m seine	-82.4518	27.6908	absent
TBF1993072113	21.3-m seine	-82.4518	27.6908	absent
TBF1993072114	21.3-m seine	-82.4518	27.6908	absent
TBF1993072115	21.3-m seine	-82.4518	27.6908	absent
TBF1993081701	21.3-m seine	-82.3913	27.8595	absent
TBF1993081702	21.3-m seine	-82.3913	27.8595	absent
TBF1993081703	21.3-m seine	-82.3913	27.8595	absent
TBF1993081704	21.3-m seine	-82.3913	27.8595	absent
TBF1993081708	21.3-m seine	-82.3758	27.8533	absent
TBF1993081709	21.3-m seine	-82.3758	27.8533	absent
TBF1993081710	21.3-m seine	-82.3758	27.8533	absent
TBF1993081711	21.3-m seine	-82.3758	27.8533	absent
TBF1993081712	21.3-m seine	-82.3758	27.8533	absent
TBF1993081713	21.3-m seine	-82.3758	27.8533	absent
TBF1993081714	21.3-m seine	-82.3758	27.8533	absent
TBF1993081715	21.3-m seine	-82.3758	27.8533	absent
TBF1993081801	21.3-m seine	-82.4518	27.6908	absent
TBF1993081802	21.3-m seine	-82.4518	27.6908	absent
TBF1993081803	21.3-m seine	-82.4518	27.6908	absent
TBF1993081804	21.3-m seine	-82.4518	27.6908	absent
TBF1993081805	21.3-m seine	-82.4518	27.6908	absent
TBF1993081806	21.3-m seine	-82.4518	27.6908	absent
TBF1993081807	21.3-m seine	-82.4262	27.6688	absent
TBF1993081808	21.3-m seine	-82.4262	27.6688	absent
TBF1993081809	21.3-m seine	-82.4262	27.6688	absent
TBF1993092001	21.3-m seine	-82.4262	27.6688	absent
TBF1993092002	21.3-m seine	-82.4262	27.6688	absent
TBF1993092003	21.3-m seine	-82.4262	27.6688	absent
TBF1993092010	21.3-m seine	-82.4518	27.6908	absent
TBF1993092011	21.3-m seine	-82.4518	27.6908	absent
TBF1993092012	21.3-m seine	-82.4518	27.6908	absent
TBF1993092013	21.3-m seine	-82.4518	27.6908	absent
TBF1993092014	21.3-m seine	-82.4518	27.6908	absent
TBF1993092015	21.3-m seine	-82.4518	27.6908	absent
TBF1993092101	21.3-m seine	-82.3758	27.8533	absent
TBF1993092102	21.3-m seine	-82.3758	27.8533	absent
TBF1993092103	21.3-m seine	-82.3758	27.8533	absent
TBF1993092104	21.3-m seine	-82.3758	27.8533	absent
TBF1993092105	21.3-m seine	-82.3758	27.8533	absent
TBF1993092106	21.3-m seine	-82.3758	27.8533	absent
TBF1993092107	21.3-m seine	-82.3758	27.8533	absent
TBF1993092108	21.3-m seine	-82.3758	27.8533	absent
TBF1993092112	21.3-m seine	-82.3913	27.8595	absent
TBF1993092113	21.3-m seine	-82.3913	27.8595	absent
TBF1993092114	21.3-m seine	-82.3913	27.8595	absent
TBF1993092115	21.3-m seine	-82.3913	27.8595	absent
TBF1993102004	21.3-m seine	-82.3758	27.8533	absent
TBF1993102005	21.3-m seine	-82.3758	27.8533	absent
TBF1993102006	21.3-m seine	-82.3758	27.8533	absent
TBF1993102007	21.3-m seine	-82.3758	27.8533	absent
TBF1993102008	21.3-m seine	-82.3758	27.8533	absent
TBF1993102009	21.3-m seine	-82.3758	27.8533	absent
TBF1993102010	21.3-m seine	-82.3758	27.8533	absent
TBF1993102011	21.3-m seine	-82.3758	27.8533	absent
TBF1993102012	21.3-m seine	-82.3913	27.8595	absent
TBF1993102013	21.3-m seine	-82.3913	27.8595	absent
TBF1993102014	21.3-m seine	-82.3913	27.8595	absent
TBF1993102015	21.3-m seine	-82.3913	27.8595	absent
TBF1993102101	21.3-m seine	-82.4518	27.6908	absent
TBF1993102102	21.3-m seine	-82.4518	27.6908	absent
TBF1993102103	21.3-m seine	-82.4518	27.6908	absent
TBF1993102104	21.3-m seine	-82.4518	27.6908	absent
TBF1993102105	21.3-m seine	-82.4518	27.6908	absent
TBF1993102106	21.3-m seine	-82.4518	27.6908	absent
TBF1993102113	21.3-m seine	-82.4262	27.6688	absent
TBF1993102114	21.3-m seine	-82.4262	27.6688	absent
TBF1993102115	21.3-m seine	-82.4262	27.6688	absent
TBF1993111501	21.3-m seine	-82.4268	27.6677	absent
TBF1993111502	21.3-m seine	-82.4268	27.6677	absent
TBF1993111503	21.3-m seine	-82.4268	27.6677	absent
TBF1993111510	21.3-m seine	-82.4532	27.6905	absent
TBF1993111511	21.3-m seine	-82.4532	27.6905	absent
TBF1993111512	21.3-m seine	-82.4532	27.6905	absent
TBF1993111513	21.3-m seine	-82.4532	27.6905	absent
TBF1993111514	21.3-m seine	-82.4532	27.6905	absent
TBF1993111515	21.3-m seine	-82.4532	27.6905	absent
TBF1993111601	21.3-m seine	-82.3913	27.8595	absent
TBF1993111602	21.3-m seine	-82.3913	27.8595	absent
TBF1993111603	21.3-m seine	-82.3913	27.8595	absent
TBF1993111604	21.3-m seine	-82.3913	27.8595	absent
TBF1993111608	21.3-m seine	-82.3758	27.8533	absent
TBF1993111609	21.3-m seine	-82.3758	27.8533	absent
TBF1993111610	21.3-m seine	-82.3758	27.8533	absent
TBF1993111611	21.3-m seine	-82.3758	27.8533	absent
TBF1993111612	21.3-m seine	-82.3758	27.8533	absent
TBF1993111613	21.3-m seine	-82.3758	27.8533	absent
TBF1993111614	21.3-m seine	-82.3758	27.8533	absent
TBF1993111615	21.3-m seine	-82.3758	27.8533	absent
TBF1993122001	21.3-m seine	-82.4262	27.6688	absent
TBF1993122002	21.3-m seine	-82.4262	27.6688	absent
TBF1993122003	21.3-m seine	-82.4262	27.6688	absent
TBF1993122010	21.3-m seine	-82.4573	27.6973	absent
TBF1993122011	21.3-m seine	-82.4573	27.6973	absent
TBF1993122012	21.3-m seine	-82.4573	27.6973	absent
TBF1993122013	21.3-m seine	-82.4573	27.6973	absent
TBF1993122014	21.3-m seine	-82.4573	27.6973	absent
TBF1993122015	21.3-m seine	-82.4573	27.6973	absent
TBF1993122101	21.3-m seine	-82.3657	27.8568	absent
TBF1993122102	21.3-m seine	-82.3657	27.8568	absent
TBF1993122103	21.3-m seine	-82.3657	27.8568	absent
TBF1993122104	21.3-m seine	-82.3575	27.8432	absent
TBF1993122105	21.3-m seine	-82.3575	27.8432	absent
TBF1993122106	21.3-m seine	-82.3575	27.8432	absent
TBF1993122107	21.3-m seine	-82.3575	27.8432	absent
TBF1993122108	21.3-m seine	-82.3575	27.8432	absent
TBF1993122112	21.3-m seine	-82.3913	27.8595	absent
TBF1993122113	21.3-m seine	-82.3913	27.8595	absent
TBF1993122114	21.3-m seine	-82.3913	27.8595	absent
TBF1993122115	21.3-m seine	-82.3913	27.8595	absent
TBF1994012407	21.3-m seine	-82.4265	27.6677	absent
TBF1994012408	21.3-m seine	-82.4265	27.6677	absent
TBF1994012409	21.3-m seine	-82.4265	27.6677	absent
TBF1994012410	21.3-m seine	-82.45	27.6895	absent
TBF1994012411	21.3-m seine	-82.45	27.6895	absent
TBF1994012412	21.3-m seine	-82.45	27.6895	absent
TBF1994012413	21.3-m seine	-82.45	27.6895	absent
TBF1994012414	21.3-m seine	-82.45	27.6895	absent
TBF1994012415	21.3-m seine	-82.45	27.6895	absent
TBF1994012501	21.3-m seine	-82.4005	27.851	absent
TBF1994012502	21.3-m seine	-82.4005	27.851	absent
TBF1994012503	21.3-m seine	-82.4005	27.851	absent
TBF1994012504	21.3-m seine	-82.4005	27.851	absent
TBF1994012505	21.3-m seine	-82.3758	27.8533	absent
TBF1994012506	21.3-m seine	-82.3758	27.8533	absent
TBF1994012507	21.3-m seine	-82.3758	27.8533	absent
TBF1994012508	21.3-m seine	-82.3758	27.8533	absent
TBF1994012509	21.3-m seine	-82.3758	27.8533	absent
TBF1994012510	21.3-m seine	-82.3758	27.8533	absent
TBF1994012511	21.3-m seine	-82.3758	27.8533	absent
TBF1994012512	21.3-m seine	-82.3758	27.8533	absent
TBF1994022101	21.3-m seine	-82.3913	27.8595	absent
TBF1994022102	21.3-m seine	-82.3913	27.8595	absent
TBF1994022103	21.3-m seine	-82.3913	27.8595	absent
TBF1994022104	21.3-m seine	-82.3913	27.8595	absent
TBF1994022108	21.3-m seine	-82.3758	27.8533	absent
TBF1994022109	21.3-m seine	-82.3758	27.8533	absent
TBF1994022110	21.3-m seine	-82.3758	27.8533	absent
TBF1994022111	21.3-m seine	-82.3758	27.8533	absent
TBF1994022112	21.3-m seine	-82.3758	27.8533	absent
TBF1994022113	21.3-m seine	-82.3758	27.8533	absent
TBF1994022114	21.3-m seine	-82.3758	27.8533	absent
TBF1994022207	21.3-m seine	-82.4262	27.6688	absent
TBF1994022208	21.3-m seine	-82.4262	27.6688	absent
TBF1994022209	21.3-m seine	-82.4262	27.6688	absent
TBF1994022210	21.3-m seine	-82.4518	27.6908	absent
TBF1994022211	21.3-m seine	-82.4518	27.6908	absent
TBF1994022212	21.3-m seine	-82.4518	27.6908	absent
TBF1994022213	21.3-m seine	-82.4518	27.6908	absent
TBF1994022214	21.3-m seine	-82.4518	27.6908	absent
TBF1994022215	21.3-m seine	-82.4518	27.6908	absent
TBF1994032101	21.3-m seine	-82.3913	27.8595	absent
TBF1994032102	21.3-m seine	-82.3913	27.8595	absent
TBF1994032103	21.3-m seine	-82.3913	27.8595	absent
TBF1994032104	21.3-m seine	-82.3913	27.8595	absent
TBF1994032105	21.3-m seine	-82.3758	27.8533	absent
TBF1994032106	21.3-m seine	-82.3758	27.8533	absent
TBF1994032107	21.3-m seine	-82.3758	27.8533	absent
TBF1994032108	21.3-m seine	-82.3758	27.8533	absent
TBF1994032109	21.3-m seine	-82.3758	27.8533	absent
TBF1994032110	21.3-m seine	-82.3758	27.8533	absent
TBF1994032111	21.3-m seine	-82.3758	27.8533	absent
TBF1994032112	21.3-m seine	-82.3758	27.8533	absent
TBF1994032407	21.3-m seine	-82.4262	27.6688	absent
TBF1994032408	21.3-m seine	-82.4262	27.6688	absent
TBF1994032409	21.3-m seine	-82.4262	27.6688	absent
TBF1994032410	21.3-m seine	-82.4518	27.6908	absent
TBF1994032411	21.3-m seine	-82.4518	27.6908	absent
TBF1994032412	21.3-m seine	-82.4518	27.6908	absent
TBF1994032413	21.3-m seine	-82.4518	27.6908	absent
TBF1994032414	21.3-m seine	-82.4518	27.6908	absent
TBF1994032415	21.3-m seine	-82.4518	27.6908	absent
TBF1994041801	21.3-m seine	-82.3913	27.8595	absent
TBF1994041802	21.3-m seine	-82.3913	27.8595	absent
TBF1994041803	21.3-m seine	-82.3913	27.8595	absent
TBF1994041804	21.3-m seine	-82.3913	27.8595	absent
TBF1994041808	21.3-m seine	-82.3758	27.8533	absent
TBF1994041809	21.3-m seine	-82.3758	27.8533	absent
TBF1994041810	21.3-m seine	-82.3758	27.8533	absent
TBF1994041811	21.3-m seine	-82.3758	27.8533	absent
[truncated: 14,114 more rows]

## Sheet: Upstream spread data (Fig. 2)
reference	longitude	latitude	km upstream	date
TBM1998101316	-82.4387	27.718	4.99	1998-10-13
TBM1998111905	-82.4609	27.7067
TBM1999081203	-82.4455	27.7158
TBM1999091411	-82.434	27.6725	10.09	1999-09-14
TBM1999101411	-82.437	27.6675	11.02	1999-10-14
TBM1999111217	-82.428	27.6695	12.04	1999-11-12
TBM1999111218	-82.4382	27.668
TBM1999111219	-82.4377	27.6878
TBM2000101006	-82.4387	27.687
TBM2000101008	-82.423	27.67
TBM2001080712	-82.4488	27.6862
TBM2001091002	-82.4317	27.6782
TBM2001100410	-82.4498	27.6872
TBM2002011214	-82.4314	27.667
TBM2002050701	-82.4544	27.7136
TBM2002111503	-82.4296	27.6656
TBM2002120610	-82.4337	27.6782
TBM2002120611	-82.4332	27.6658
TBM2002120612	-82.4232	27.6705
TBM2003010810	-82.4311	27.6658
TBM2003010811	-82.4344	27.6859
TBM2003021004	-82.4337	27.6661
TBM2003090611	-82.4512	27.7148
TBM2004090406	-82.4712	27.7136
TBM2004121112	-82.4383	27.7166
TBM2004121113	-82.4381	27.7167
TBM2004121114	-82.4513	27.7144
TBM2005060907	-82.4315	27.6833
TBM2005080907	-82.458	27.694
TBM2005091205	-82.4475	27.6879
TBM2005091208	-82.4563	27.7132
TBM2005101203	-82.4255	27.67
TBM2005110302	-82.4566	27.7033
TBM2006030111	-82.4327	27.6792
TBM2006090109	-82.4467	27.7167
TBM2006100204	-82.4316	27.6834
TBM2006100209	-82.4535	27.7182
TBM2006110504	-82.459	27.7059
TBM2006110507	-82.4514	27.7093
TBM2006110508	-82.4489	27.6905
TBM2006110509	-82.4369	27.6864
TBM2006120111	-82.4367	27.6865

## Sheet: BRT data
reference	B. belizanus abundance	B. belizanus presence	depth	temperature	pH	salinity	DO	waterbody type	shoreline	bottom	inundation	overhang	gradient	Julian day	waterbody name
TBM2006011601	0	0	0.3	21.2	7.4	5.5	6	river	EMM	Sand	YES	NO	13.3333	24	Little Manatee River
TBM2006011602	0	0	0.2	21.3	7.4	5.3	7.3	river	EMM	Sand	NO	NO	13.3333	24	Little Manatee River
TBM2006011603	0	0	0.2	21.3	7.4	4.5	6.8	river	EMM	Sand	YES	NO	6.6667	24	Little Manatee River
TBM2006011604	0	0	0.6	21.3	7.4	4.8	7.1	river	EMM	Sand	YES	NO	33.3333	24	Little Manatee River
TBM2006011605	0	0	0.5	21.7	7.5	4.8	7.6	creek	EMM	Sand	YES	NO	26.6667	24	Curiosity Creek
TBM2006011606	0	0	0.5	21.8	7.5	4.9	7.6	creek	EMM	Sand	YES	NO	26.6667	24	Curiosity Creek
TBM2006011607	0	0	0.5	21.7	7.5	4.8	7.6	creek	STV	Sand	NO	NO	33.3333	24	Curiosity Creek
TBM2006011608	0	0	1.2	21.8	7.5	4.6	8.4	creek	STV	Sand	YES	NO	53.3333	24	Curiosity Creek
TBM2006011609	0	0	1	21.9	7.5	4.7	7.9	creek	STV	Mud-sand	NO	NO	33.3333	24	Curiosity Creek
TBM2006011610	1	1	0.5	22	7.5	4.7	7.9	creek	SHT	Mud-sand	NO	YES	33.3333	24	Curiosity Creek
TBM2006011611	0	0	0.8	21.8	7.5	4.3	7.8	creek	SHT	Sand	YES	YES	46.6667	24	Curiosity Creek
TBM2006011612	0	0	0.6	21.7	7.4	3.4	8.8	creek	SHT	Sand	NO	NO	40	24	Curiosity Creek
TBM2006011613	0	0	0.5	21.4	7.3	3	7	creek	SHT	Sand	NO	YES	0	24	Curiosity Creek
TBM2006011614	0	0	1	21.6	7.3	2.8	7	creek	STV	Sand	NO	NO	40	24	Curiosity Creek
TBM2006011615	0	0	0.5	22.2	7.7	17.6	6.7	river	MAS	Sand	YES	YES	26.6667	24	Little Manatee River
TBM2006011616	0	0	0.5	22.2	7.7	17.7	6.5	river	MAS	Sand	YES	YES	26.6667	24	Little Manatee River
TBM2006011701	0	0	0.3	19.9	7.6	10	7.9	river	OTH	Sand	NO	NO	20	25	Little Manatee River
TBM2006011702	0	0	0.2	19.6	7.7	9.8	7.2	river	SHT	Sand	YES	NO	13.3333	25	Little Manatee River
TBM2006011703	0	0	0.1	17.3	7.8	15	8.7	bayou	EMM	Mud-sand	NO	NO	6.6667	25	Hayes Bayou
TBM2006011704	0	0	0.2	18.9	7.3	8.9	5.6	creek	EMM	Mud-sand	NO	NO	13.3333	25	Wildcat Creek
TBM2006011705	0	0	0.9	19	7.3	8.1	5.4	creek	EMM	Mud-sand	NO	NO	46.6667	25	Wildcat Creek
TBM2006011706	0	0	0.3	19	7.3	7.8	6.4	creek	OTH	Mud-sand	YES	NO	20	25	Wildcat Creek
TBM2006011707	0	0	0.3	19	7.3	7.8	6.4	creek	EMM	Mud-sand	NO	NO	20	25	Wildcat Creek
TBM2006011708	0	0	0.2	20.4	7.4	7.1	8.4	creek	EMM	Mud	NO	NO	13.3333	25	Wildcat Creek
TBM2006011709	1	1	0.3	19.8	7.4	6.5	7.2	creek	EMM	Mud-sand	NO	NO	20	25	Wildcat Creek
TBM2006011710	0	0	0.3	20	7.4	6	8.3	creek	EMM	Mud	NO	NO	20	25	Wildcat Creek
TBM2006011711	0	0	0.1	20.2	7.4	5.1	7.2	creek	EMM	Mud-sand	NO	NO	6.6667	25	Wildcat Creek
TBM2006011712	0	0	0.1	20.2	7.3	5.2	6.9	creek	EMM	Mud-sand	NO	NO	6.6667	25	Wildcat Creek
TBM2006011713	0	0	0.3	20.3	7.5	10.4	7.8	creek	EMM	Mud-sand	NO	NO	20	25	Wildcat Creek
TBM2006011714	0	0	0.1	22.3	8	13.6	8.5	bayou	EMM	Sand	NO	NO	6.6667	25	Hayes Bayou
TBM2006011715	0	0	0.1	22.2	8	14.8	9.3	bayou	EMM	Sand	NO	NO	6.6667	25	Hayes Bayou
TBM2006011716	0	0	0.3	21.4	8.1	14.5	9.2	bayou	EMM	Sand	YES	NO	13.3333	25	Hayes Bayou
TBM2006011801	0	0	0.2	17.2	7.6	4.8	7.7	river	EMM	Mud	NO	NO	13.3333	26	Alafia River
TBM2006011802	0	0	0.2	17.2	7.6	4.8	7.7	river	EMM	Mud	NO	NO	13.3333	26	Alafia River
TBM2006011803	0	0	0.2	17.9	7.9	5.1	9.7	river	HAS	Mud	NO	NO	13.3333	26	Alafia River
TBM2006011804	0	0	0.2	18	7.9	5.2	9.5	river	HAS	Mud-sand	NO	NO	13.3333	26	Alafia River
TBM2006011805	1	1	0.2	17.6	8.1	5.2	11.2	canal	STV	Mud	NO	NO	13.3333	26	Question Mark Creek
TBM2006011806	0	0	0.2	18	8.3	5.8	12.8	canal	SHT	Mud	NO	NO	13.3333	26	Question Mark Creek
TBM2006011807	0	0	0.2	16.9	8.3	5.2	12.4	canal	HAS	Mud	YES	NO	13.3333	26	Question Mark Creek
TBM2006011808	1	1	0.2	19.3	8.4	6.7	13.7	canal	SHT	Mud	NO	NO	13.3333	26	Question Mark Creek
TBM2006011809	0	0	0.2	19.4	8.3	2.6	11.5	river	HAS	Mud-sand	YES	YES	6.6667	26	Alafia River
TBM2006011810	0	0	0.2	18.2	8.3	2.8	11.3	river	HAS	Oyst/rock	NO	NO	13.3333	26	Alafia River
TBM2006011811	0	0	0.2	18.7	7.7	3.3	8.7	river	HAS	Mud-sand	NO	NO	13.3333	26	Alafia River
TBM2006011812	0	0	0.2	19.3	8.4	2.9	12.9	canal	HAS	Mud	NO	NO	13.3333	26	Riverview West Creek
TBM2006011813	0	0	0.2	19.2	7.5	2.4	7.4	canal	HAS	Mud	NO	NO	13.3333	26	Riverview West Creek
TBM2006011814	0	0	0.2	19.8	8.5	2.3	14.2	canal	STV	Mud	NO	NO	13.3333	26	Riverview West Creek
TBM2006011815	0	0	0.2	20.2	8.3	2.1	13.5	canal	HAS	Mud	NO	NO	13.3333	26	Riverview West Creek
TBM2006011816	0	0	0.2	19.6	8.3	2.5	11.7	river	EMM	Mud-sand	NO	NO	13.3333	26	Alafia River
TBM2006011817	0	0	0.3	20.2	8.8	2	15.9	river	HAS	Mud-sand	NO	NO	20	26	Alafia River
TBM2006011818	0	0	0.4	19.3	7.6	2.6	8.2	river	HAS	Mud-sand	YES	NO	13.3333	26	Alafia River
TBM2006011901	0	0	0.3	18.2	7.9	1.1	8.2	canal	STV	Mud	NO	NO	20	27	Dogleg Creek
TBM2006011902	1	1	0.4	17.9	7.8	1.1	8	canal	STV	Mud	NO	NO	26.6667	27	Dogleg Creek
TBM2006011903	0	0	0.5	19.2	7.9	1.4	7.2	canal	OTH	Mud	NO	NO	33.3333	27	Dogleg Creek
TBM2006011904	0	0	0.4	19.4	8.1	1.4	8	canal	STV	Mud	NO	NO	26.6667	27	Dogleg Creek
TBM2006011905	0	0	1	18.6	7.9	0.3	7.6	river	SHT	Mud-sand	NO	NO	66.6667	27	Alafia River
TBM2006011906	0	0	0.8	18.6	8	0.3	7.4	river	SHT	Mud-sand	NO	NO	53.3333	27	Alafia River
TBM2006011907	0	0	1	18.4	7.9	0.4	7.1	river	STV	Oyst/rock	NO	NO	66.6667	27	Alafia River
TBM2006011908	0	0	0.9	18.5	7.9	0.4	7.1	river	HAS	Mud	NO	NO	60	27	Alafia River
TBM2006011909	0	0	0.1	17	7.7	0.1	9.7	creek	SHT	Sand	NO	NO	6.6667	27	Rice Creek
TBM2006011910	0	0	0.1	17.2	7.3	0.1	9.5	creek	EMM	Sand	NO	NO	6.6667	27	Rice Creek
TBM2006011911	0	0	0.1	16.5	7.2	0.1	9.2	creek	HAS	Sand	YES	NO	0	27	Rice Creek
TBM2006011912	0	0	0.1	16.4	7.2	0.1	9.5	creek	SHT	Sand	YES	YES	0	27	Rice Creek
TBM2006021701	1	1	0.3	11.8	6.9	1.4	10.7	river	EMM	Mud-sand	YES	NO	20	44	Little Manatee River
TBM2006021702	0	0	0.4	12.5	7.2	0.5	9.1	river	EMM	Sand	YES	NO	26.6667	44	Little Manatee River
TBM2006021703	0	0	0.2	12.6	7.4	0.9	8.8	creek	EMM	Sand	NO	NO	13.3333	44	Curiosity Creek
TBM2006021704	0	0	0.4	12.2	7.4	0.9	7.7	creek	EMM	Sand	NO	NO	6.6667	44	Curiosity Creek
TBM2006021705	0	0	1	12.2	7.5	0.7	8.4	creek	EMM	Sand	NO	NO	66.6667	44	Curiosity Creek
TBM2006021706	0	0	0.6	12.5	7.5	0.7	9.6	creek	EMM	Sand	NO	NO	40	44	Curiosity Creek
TBM2006021707	0	0	0.4	11.9	7.5	0.6	9.6	creek	SHT	Sand	NO	NO	26.6667	44	Curiosity Creek
TBM2006021708	0	0	0.4	12.3	7.6	0.6	9.3	creek	EMM	Sand	NO	NO	26.6667	44	Curiosity Creek
TBM2006021709	0	0	1	12.8	7.5	0.6	9.1	creek	EMM	Sand	NO	NO	66.6667	44	Curiosity Creek
TBM2006021710	0	0	0.4	13	7.5	0.6	8.7	creek	STV	Sand	NO	YES	26.6667	44	Curiosity Creek
TBM2006021711	0	0	0.2	14.1	7.3	0.6	8.5	creek	EMM	Sand	NO	NO	13.3333	44	Curiosity Creek
TBM2006021712	0	0	0.2	14.9	7.5	0.7	8.7	creek	EMM	Mud-sand	NO	NO	13.3333	44	Curiosity Creek
TBM2006021713	0	0	0.5	14.7	7.5	0.6	8.8	river	EMM	Mud-sand	YES	NO	33.3333	44	Little Manatee River
TBM2006021714	0	0	0.1	14.4	7.5	0.7	8.8	river	EMM	Sand	NO	NO	6.6667	44	Little Manatee River
TBM2006021715	0	0	0.2	14.9	7.6	7.2	9	river	MAS	Sand	NO	YES	13.3333	44	Little Manatee River
TBM2006021716	0	0	0.2	14.9	7.6	7.2	9	river	MAS	Sand	YES	YES	13.3333	44	Little Manatee River
TBM2006021801	0	0	0.2	12.8	7.6	9	9.4	bayou	EMM	Sand	YES	NO	6.6667	45	Hayes Bayou
TBM2006021802	0	0	0.2	13.5	7.7	9.2	9.5	bayou	EMM	Sand	YES	NO	6.6667	45	Hayes Bayou
TBM2006021803	0	0	0.1	11.6	7.5	5.3	9.2	creek	EMM	Sand	NO	NO	6.6667	45	Wildcat Creek
TBM2006021804	0	0	0.1	11.9	7.4	5.5	8.3	creek	EMM	Sand	NO	NO	6.6667	45	Wildcat Creek
TBM2006021805	0	0	0.3	12	7.4	5.6	8.4	creek	EMM	Sand	NO	NO	20	45	Wildcat Creek
TBM2006021806	0	0	0.1	12.5	7.3	5.4	8	creek	EMM	Sand	NO	NO	6.6667	45	Wildcat Creek
TBM2006021807	0	0	0.1	13.1	7.3	5.4	7.6	creek	EMM	Mud-sand	NO	NO	0	45	Wildcat Creek
TBM2006021808	0	0	0.9	13.1	7.3	5.4	7.9	creek	EMM	Mud-sand	NO	NO	60	45	Wildcat Creek
TBM2006021809	0	0	1	14.4	7.2	5.1	7.6	creek	MAS	Mud	NO	NO	66.6667	45	Wildcat Creek
TBM2006021810	0	0	0.3	14.5	7.2	4	7.1	creek	EMM	Mud	NO	NO	20	45	Wildcat Creek
TBM2006021811	0	0	0.9	15.6	7.2	5.4	7	creek	SHT	Mud	NO	YES	60	45	Wildcat Creek
TBM2006021812	0	0	0.3	15.1	7.2	4.6	7	creek	EMM	Mud	NO	NO	20	45	Wildcat Creek
TBM2006021813	0	0	0.1	18.5	8.3	9.8	10.3	bayou	EMM	Sand	NO	NO	6.6667	45	Hayes Bayou
TBM2006021814	0	0	0.1	17.5	8.1	9.8	8.8	bayou	EMM	Mud	NO	NO	6.6667	45	Hayes Bayou
TBM2006021815	0	0	0.4	13.8	7.3	6.3	10.4	river	SHT	Mud-sand	NO	YES	26.6667	45	Little Manatee River
TBM2006021816	0	0	1	13.8	7.5	6.7	8.6	river	HAS	Oyst/rock	YES	NO	53.3333	45	Little Manatee River
TBM2006021901	0	0	0.4	14	7.6	4.2	8	river	HAS	Sand	NO	NO	26.6667	46	Alafia River
TBM2006021902	0	0	0.2	13.9	7.6	3.7	8.4	river	HAS	Mud-sand	NO	NO	13.3333	46	Alafia River
TBM2006021903	0	0	0.4	13.4	7.9	3.4	8.6	canal	SHT	Mud-sand	YES	YES	13.3333	46	Question Mark Creek
TBM2006021904	0	0	0.2	14.5	7.6	5.5	6.9	canal	SHT	Mud	NO	YES	13.3333	46	Question Mark Creek
TBM2006021905	0	0	0.2	17	7.5	6.3	5.6	canal	SHT	Mud	NO	YES	13.3333	46	Question Mark Creek
TBM2006021906	0	0	0.3	16.3	7.7	10.8	6.4	canal	SHT	Mud	NO	NO	20	46	Question Mark Creek
TBM2006021907	0	0	0.2	17	7.7	3.3	8.1	river	SHT	Mud-sand	NO	NO	13.3333	46	Alafia River
TBM2006021908	0	0	0.1	17	7.7	1.9	8.5	river	EMM	Mud-sand	NO	NO	6.6667	46	Alafia River
TBM2006021909	0	0	0.2	15	7.8	0.2	8.8	river	HAS	Mud-sand	NO	NO	13.3333	46	Alafia River
TBM2006021910	0	0	0.2	14.9	7.9	0.3	8.9	river	HAS	Sand	NO	NO	13.3333	46	Alafia River
TBM2006021911	0	0	0.3	15.1	8	0.3	10.2	canal	STV	Mud	NO	NO	20	46	Riverview West Creek
TBM2006021912	0	0	0.3	15.4	8	0.3	10.2	canal	STV	Mud	NO	NO	20	46	Riverview West Creek
TBM2006021913	0	0	0.2	15.3	7.9	0.3	11.3	canal	HAS	Mud	NO	NO	13.3333	46	Riverview West Creek
TBM2006021914	0	0	0.3	15.6	8	0.3	10.9	canal	HAS	Mud	NO	NO	20	46	Riverview West Creek
TBM2006021915	0	0	0.3	17.6	8	0.3	10	river	HAS	Oyst/rock	YES	NO	20	46	Alafia River
TBM2006022001	0	0	0.3	13.9	7.7	0.2	9.3	river	STV	Mud-sand	NO	NO	20	47	Alafia River
TBM2006022002	0	0	0.6	14	7.7	0.2	9.2	river	SHT	Mud	NO	YES	40	47	Alafia River
TBM2006022003	0	0	1	14	7.7	0.2	9.2	river	SHT	Mud-sand	NO	NO	66.6667	47	Alafia River
TBM2006022004	0	0	0.7	13.9	7.7	0.2	9.1	river	STV	Mud-sand	NO	NO	46.6667	47	Alafia River
TBM2006022005	0	0	0.4	15.1	7.8	0.5	9.2	canal	SHT	Mud	NO	NO	26.6667	47	Dogleg Creek
TBM2006022006	0	0	0.5	15.6	7.9	0.6	9.2	canal	STV	Mud	NO	NO	33.3333	47	Dogleg Creek
TBM2006022007	0	0	0.6	18.5	7.9	1.2	8.6	canal	STV	Mud-sand	NO	NO	40	47	Dogleg Creek
TBM2006022008	0	0	0.7	18.5	8	1.2	8.8	canal	OTH	Mud	NO	YES	46.6667	47	Dogleg Creek
TBM2006022009	0	0	0.3	14.6	7.7	0.2	8.8	river	HAS	Mud-sand	NO	NO	20	47	Alafia River
TBM2006022010	0	0	0.5	14.4	7.7	0.3	9.1	river	HAS	Oyst/rock	YES	NO	6.6667	47	Alafia River
TBM2006022011	0	0	0.1	15.4	7.5	0.1	9.2	creek	STV	Sand	NO	NO	6.6667	47	Rice Creek
TBM2006022012	0	0	0.1	15.4	7.3	0.1	9.2	creek	EMM	Sand	NO	NO	6.6667	47	Rice Creek
TBM2006022013	0	0	0.1	15.4	7.2	0.1	9	creek	STV	Sand	NO	NO	6.6667	47	Rice Creek
TBM2006022014	0	0	0.1	15.4	7.2	0.1	9	creek	STV	Sand	NO	NO	6.6667	47	Rice Creek
TBM2006022015	0	0	0.5	15.7	7.6	0.3	9.8	river	HAS	Mud	YES	NO	0	47	Alafia River
TBM2006032301	0	0	0.4	20.3	7.4	12.2	5.5	bayou	EMM	Mud	YES	NO	20	65	Hayes Bayou
TBM2006032302	0	0	0.3	19.1	7.6	10.8	7.6	bayou	EMM	Mud	YES	NO	13.3333	65	Hayes Bayou
TBM2006032303	0	0	0.4	19.5	7.7	11.3	7.6	creek	EMM	Mud-sand	YES	NO	13.3333	65	Wildcat Creek
TBM2006032304	0	0	0.6	19.7	7.5	11.5	5.9	creek	EMM	Mud	YES	NO	26.6667	65	Wildcat Creek
TBM2006032305	0	0	0.7	20.3	7.5	11.9	5.6	creek	EMM	Sand	YES	NO	33.3333	65	Wildcat Creek
TBM2006032306	1	1	0.4	20.7	7.4	11.7	5.4	creek	EMM	Mud-sand	YES	NO	13.3333	65	Wildcat Creek
TBM2006032307	0	0	0.4	20.6	7.5	11.2	5	creek	EMM	Mud-sand	YES	NO	20	65	Wildcat Creek
TBM2006032308	0	0	0.4	20.6	7.6	11.6	4.9	creek	EMM	Mud	YES	NO	6.6667	65	Wildcat Creek
TBM2006032309	0	0	0.5	20.2	7.4	9.6	5.5	creek	SHT	Mud	YES	YES	6.6667	65	Wildcat Creek
TBM2006032310	0	0	0.6	20.5	7.6	8	6.3	creek	EMM	Mud-sand	YES	NO	20	65	Wildcat Creek
TBM2006032311	0	0	0.8	20.7	7.6	7.2	6.5	creek	STV	Mud	NO	NO	53.3333	65	Wildcat Creek
TBM2006032312	0	0	0.5	20.9	7.5	7.3	7	creek	EMM	Mud-sand	YES	NO	13.3333	65	Wildcat Creek
TBM2006032313	0	0	0.5	21.7	7.8	11.5	8	bayou	EMM	Mud-sand	YES	NO	13.3333	65	Hayes Bayou
TBM2006032314	0	0	0.5	21.9	7.8	11.6	7.9	bayou	EMM	Mud	YES	NO	13.3333	65	Hayes Bayou
TBM2006032315	0	0	0.5	21.2	7.6	17.1	6.4	river	MAS	Sand	YES	NO	26.6667	65	Little Manatee River
TBM2006032316	0	0	0.5	21.3	7.6	17.1	6.4	river	HAS	Sand	YES	NO	20	65	Little Manatee River
TBM2006032317	0	0	0.8	22.2	7.7	16.9	6.7	river	MAS	Sand	YES	YES	33.3333	65	Little Manatee River
TBM2006032318	0	0	0.5	22.3	7.7	16.9	6.8	river	MAS	Sand	YES	NO	20	65	Little Manatee River
TBM2006032401	0	0	0.4	20.6	7.3	3.7	8.5	river	EMM	Sand	YES	NO	20	66	Little Manatee River
TBM2006032402	0	0	0.1	20.6	7.5	3.8	8.4	river	EMM	Sand	YES	NO	0	66	Little Manatee River
TBM2006032403	0	0	0.3	20.2	7.4	2.8	8	river	EMM	Sand	YES	NO	13.3333	66	Little Manatee River
TBM2006032404	0	0	0.5	20.6	7.3	3.2	8	river	EMM	Sand	YES	NO	20	66	Little Manatee River
TBM2006032405	0	0	0.1	20.7	7.5	3.9	10	creek	EMM	Sand	YES	NO	0	66	Curiosity Creek
TBM2006032406	0	0	0.5	20.6	7.4	3.4	8.8	creek	EMM	Sand	YES	NO	13.3333	66	Curiosity Creek
TBM2006032407	0	0	1	20.5	7.5	3.3	8.7	creek	EMM	Sand	YES	NO	40	66	Curiosity Creek
TBM2006032408	0	0	0.5	20.6	7.4	3.1	8.4	creek	STV	Sand	YES	YES	13.3333	66	Curiosity Creek
TBM2006032409	0	0	1	20.5	7.5	2.4	8.7	creek	OTH	Sand	YES	YES	33.3333	66	Curiosity Creek
TBM2006032410	0	0	0.8	20.6	7.4	2.4	8.4	creek	STV	Sand	YES	NO	20	66	Curiosity Creek
TBM2006032411	0	0	0.5	19.6	7.6	1.8	9.3	creek	STV	Sand	YES	YES	6.6667	66	Curiosity Creek
TBM2006032412	0	0	1	19.7	7.3	1.7	8.5	creek	STV	Sand	NO	NO	46.6667	66	Curiosity Creek
TBM2006032413	0	0	0.9	19.9	7.6	1.3	9.2	creek	STV	Sand	NO	YES	46.6667	66	Curiosity Creek
TBM2006032414	0	0	0.9	19.7	7.5	1.1	9.5	creek	SHT	Sand	NO	YES	40	66	Curiosity Creek
TBM2006032501	0	0	0.8	19.4	7.3	0.3	7.1	river	SHT	Mud	NO	NO	53.3333	67	Alafia River
TBM2006032502	0	0	0.6	19.4	7.5	0.3	7.1	river	SHT	Sand	NO	YES	40	67	Alafia River
TBM2006032503	0	0	0.7	19.5	7.5	0.3	7.1	river	SHT	Sand	NO	NO	46.6667	67	Alafia River
TBM2006032504	0	0	0.5	19.5	7.6	0.3	7.6	river	SHT	Mud-sand	NO	NO	33.3333	67	Alafia River
TBM2006032505	0	0	0.4	18.9	7.6	0.3	8	canal	HAS	Mud-sand	NO	NO	26.6667	67	Dogleg Creek
TBM2006032506	0	0	0.5	19.5	7.6	0.5	8.6	canal	SHT	Mud-sand	NO	NO	33.3333	67	Dogleg Creek
TBM2006032507	0	0	0.6	18.9	7.6	0.4	8.1	canal	SHT	Mud-sand	NO	NO	40	67	Dogleg Creek
TBM2006032508	0	0	0.7	19	7.7	0.4	8.7	canal	HAS	Mud-sand	NO	YES	40	67	Dogleg Creek
TBM2006032509	0	0	0.8	19.8	7.7	0.6	8.5	river	HAS	Mud-sand	YES	NO	53.3333	67	Alafia River
TBM2006032510	0	0	0.7	19.6	7.7	0.8	8.4	river	HAS	Oyst/rock	YES	NO	20	67	Alafia River
TBM2006032511	0	0	0.4	19.7	8	0.5	10.3	creek	STV	Sand	YES	NO	20	67	Rice Creek
TBM2006032512	0	0	0.3	17.8	8.2	0.2	12.6	creek	EMM	Sand	NO	NO	20	67	Rice Creek
TBM2006032513	0	0	0.2	17.5	7.7	0.2	10	creek	HAS	Sand	YES	NO	0	67	Rice Creek
TBM2006032514	0	0	0.4	17.4	7.8	0.2	10.2	creek	STV	Mud-sand	NO	NO	26.6667	67	Rice Creek
TBM2006032515	0	0	0.9	20.1	8.2	1.1	10.2	river	HAS	Oyst/rock	YES	NO	26.6667	67	Alafia River
TBM2006032601	0	0	0.2	18.8	7.7	3.7	10.5	river	EMM	Sand	NO	NO	13.3333	68	Alafia River
TBM2006032602	0	0	0.3	19.2	7.7	5.9	8.2	river	SHT	Sand	YES	YES	6.6667	68	Alafia River
TBM2006032603	0	0	0.3	18.9	7.8	5.8	8.3	canal	SHT	Sand	YES	YES	13.3333	68	Question Mark Creek
TBM2006032604	0	0	0.2	18.5	7.9	4.9	9.9	canal	OTH	Sand	NO	NO	13.3333	68	Question Mark Creek
TBM2006032605	0	0	0.3	18.4	7.9	4.9	8.1	canal	HAS	Oyst/rock	YES	NO	13.3333	68	Question Mark Creek
TBM2006032606	0	0	0.4	19.1	7.9	5.9	9.2	canal	SHT	Sand	YES	YES	20	68	Question Mark Creek
TBM2006032607	0	0	0.4	19.5	7.8	7.8	7.7	river	HAS	Sand	YES	NO	0	68	Alafia River
TBM2006032608	0	0	0.5	19.6	7.8	7.3	8.6	river	HAS	Sand	YES	NO	0	68	Alafia River
TBM2006032609	0	0	0.2	19.6	8.3	2	11.9	river	SHT	Sand	YES	YES	13.3333	68	Alafia River
TBM2006032610	0	0	0.6	20.3	8.6	1.6	15.9	river	HAS	Sand	YES	NO	13.3333	68	Alafia River
TBM2006032611	0	0	0.6	20.5	8.5	1.8	13.7	canal	HAS	Sand	YES	NO	6.6667	68	Riverview West Creek
TBM2006032612	2	1	0.4	19.3	7.9	1.6	10.2	canal	HAS	Mud-sand	YES	NO	0	68	Riverview West Creek
TBM2006032613	0	0	0.6	20.2	8.5	1.7	13.8	canal	STV	Mud	YES	YES	40	68	Riverview West Creek
TBM2006032614	0	0	0.9	20.6	8.7	1.7	16.6	canal	STV	Sand	YES	YES	33.3333	68	Riverview West Creek
TBM2006032615	0	0	0.7	20.4	8.7	2.1	16.4	river	HAS	Sand	YES	NO	13.3333	68	Alafia River
TBM2006042301	0	0	0.2	22.2	7.3	6.2	5.8	river	EMM	Mud-sand	NO	NO	13.3333	100	Little Manatee River
TBM2006042302	0	0	0.2	23	7.2	5.1	5	river	EMM	Mud	NO	NO	13.3333	100	Little Manatee River
TBM2006042303	0	0	0.1	23	7.2	5.6	6.2	river	EMM	Mud	NO	NO	6.6667	100	Little Manatee River
TBM2006042304	0	0	0.4	21.5	7.4	2.2	5	river	EMM	Mud-sand	NO	NO	26.6667	100	Little Manatee River
TBM2006042305	0	0	0.8	21.5	7.4	2	4.7	creek	EMM	Mud	NO	NO	33.3333	100	Curiosity Creek
TBM2006042306	0	0	0.6	21.6	7.4	2	4.8	creek	EMM	Mud	NO	NO	33.3333	100	Curiosity Creek
TBM2006042307	0	0	0.5	22	7.5	1.8	5.6	creek	EMM	Mud	NO	NO	33.3333	100	Curiosity Creek
TBM2006042308	0	0	0.2	22.1	7.4	1.5	5.3	creek	EMM	Mud-sand	NO	NO	13.3333	100	Curiosity Creek
TBM2006042309	0	0	1	22.3	7.6	1.3	6.1	creek	STV	Mud	NO	YES	40	100	Curiosity Creek
TBM2006042310	0	0	0.8	22.2	7.6	1.2	6.4	creek	SHT	Sand	NO	NO	53.3333	100	Curiosity Creek
TBM2006042311	0	0	0.8	23.1	7.8	1.1	8.9	creek	SHT	Mud-sand	NO	YES	46.6667	100	Curiosity Creek
TBM2006042312	0	0	0.8	23.3	7.8	1.1	9.3	creek	SHT	Sand	NO	YES	46.6667	100	Curiosity Creek
TBM2006042313	0	0	0.5	23.1	7.8	1	8.7	creek	STV	Sand	NO	YES	33.3333	100	Curiosity Creek
TBM2006042314	0	0	0.6	23.2	7.7	0.9	8.6	creek	OTH	Mud-sand	YES	YES	26.6667	100	Curiosity Creek
TBM2006042401	0	0	0.2	22.4	7.5	13.9	6.5	river	HAS	Sand	NO	NO	13.3333	101	Little Manatee River
TBM2006042402	0	0	0.3	22.4	7.5	13.4	6.8	river	HAS	Sand	NO	NO	20	101	Little Manatee River
TBM2006042403	0	0	0.2	22	7.5	12	6.9	river	EMM	Oyst/rock	NO	NO	13.3333	101	Little Manatee River
TBM2006042404	0	0	0.2	22.2	7.5	12	6.7	river	MAS	Oyst/rock	NO	YES	13.3333	101	Little Manatee River
TBM2006042405	0	0	0.2	20.7	7.7	15	7.6	bayou	EMM	Sand	NO	NO	13.3333	101	Hayes Bayou
TBM2006042406	0	0	0.2	21	7.7	14.8	8.4	bayou	EMM	Sand	YES	NO	13.3333	101	Hayes Bayou
TBM2006042407	0	0	0.3	21.4	7.7	11.2	8.3	creek	EMM	Mud	NO	NO	20	101	Wildcat Creek
TBM2006042408	0	0	0.4	21.1	7.6	9.5	7.4	creek	EMM	Mud	NO	NO	26.6667	101	Wildcat Creek
TBM2006042409	0	0	0.3	21.5	7.6	6.7	8.2	creek	EMM	Mud-sand	NO	NO	13.3333	101	Wildcat Creek
TBM2006042410	0	0	0.3	21.6	7.7	6.7	8.2	creek	EMM	Mud	NO	NO	13.3333	101	Wildcat Creek
TBM2006042411	0	0	0.4	22.8	7.6	7.6	8.5	creek	EMM	Mud-sand	NO	NO	26.6667	101	Wildcat Creek
TBM2006042412	0	0	0.3	23.1	7.7	7.4	8.8	creek	EMM	Mud-sand	NO	NO	20	101	Wildcat Creek
TBM2006042413	0	0	0.3	24.3	8	6.8	10.9	creek	EMM	Mud-sand	NO	NO	20	101	Wildcat Creek
TBM2006042414	2	1	0.5	24.1	7.9	6.9	10.7	creek	EMM	Mud	NO	NO	33.3333	101	Wildcat Creek
TBM2006042415	0	0	0.2	25	8	5.8	12.3	creek	EMM	Mud-sand	NO	NO	13.3333	101	Wildcat Creek
TBM2006042416	0	0	0.2	26	8.1	6	13	creek	EMM	Mud-sand	NO	NO	13.3333	101	Wildcat Creek
TBM2006042417	0	0	0.3	26	7.9	19	8.6	bayou	EMM	Sand	YES	NO	13.3333	101	Hayes Bayou
TBM2006042418	0	0	0.3	26	7.9	18.9	8.6	bayou	EMM	Sand	YES	NO	13.3333	101	Hayes Bayou
TBM2006042501	0	0	0.2	22.4	7.8	2.4	7.1	river	HAS	Mud	NO	NO	13.3333	102	Alafia River
TBM2006042502	0	0	0.4	22.5	7.8	3	7.1	canal	HAS	Mud-sand	YES	NO	26.6667	102	Riverview West Creek
TBM2006042503	0	0	0.2	20.9	8	3.5	8.2	canal	HAS	Mud	YES	NO	6.6667	102	Riverview West Creek
TBM2006042504	0	0	0.2	21.6	8.2	3.6	10.5	canal	STV	Mud	NO	NO	13.3333	102	Riverview West Creek
TBM2006042505	0	0	0.3	21.6	8.2	3.6	10.2	canal	STV	Mud	NO	NO	20	102	Riverview West Creek
TBM2006042506	0	0	0.2	23.2	7.9	2.7	7.1	river	HAS	Sand	NO	NO	13.3333	102	Alafia River
TBM2006042507	0	0	0.4	23.4	7.9	2.8	7.7	river	HAS	Sand	NO	NO	26.6667	102	Alafia River
TBM2006042508	0	0	0.2	24.4	8	16.1	7.3	river	EMM	Sand	YES	NO	6.6667	102	Alafia River
TBM2006042509	0	0	0.4	23.9	8	14.9	8.5	river	SHT	Sand	NO	YES	26.6667	102	Alafia River
TBM2006042510	0	0	0.6	23.9	8	13.5	7.6	canal	SHT	Mud-sand	YES	YES	20	102	Question Mark Creek
TBM2006042511	0	0	0.5	24.1	7.9	16.4	7.1	canal	SHT	Sand	NO	YES	33.3333	102	Question Mark Creek
TBM2006042512	1	1	0.6	24	7.9	16.2	7.1	canal	EMM	Mud-sand	YES	NO	33.3333	102	Question Mark Creek
TBM2006042513	0	0	0.7	24.4	8.1	14.4	10.1	canal	SHT	Mud-sand	NO	YES	40	102	Question Mark Creek
TBM2006042514	0	0	0.7	24.1	8	20.1	7.1	river	HAS	Mud-sand	YES	NO	6.6667	102	Alafia River
TBM2006042515	0	0	0.7	24.1	8	20.1	8	river	HAS	Mud-sand	YES	NO	0	102	Alafia River
TBM2006042601	0	0	0.5	22.4	7.6	1	4.5	river	STV	Sand	NO	NO	33.3333	103	Alafia River
TBM2006042602	0	0	0.6	22.4	7.9	1	6	river	SHT	Sand	NO	NO	40	103	Alafia River
TBM2006042603	1	1	0.6	21.6	7.9	2	7	canal	SHT	Mud	NO	YES	40	103	Dogleg Creek
TBM2006042604	0	0	0.3	21.6	7.9	2	8	canal	SHT	Mud-sand	NO	YES	20	103	Dogleg Creek
TBM2006042605	0	0	0.4	21.7	8.1	2	9.8	canal	SHT	Mud-sand	NO	YES	26.6667	103	Dogleg Creek
TBM2006042606	0	0	0.4	22.9	7.8	2.2	7.1	canal	STV	Mud-sand	NO	NO	26.6667	103	Dogleg Creek
TBM2006042607	0	0	0.5	22.4	7.9	1	7.1	river	STV	Sand	NO	NO	33.3333	103	Alafia River
TBM2006042608	0	0	0.4	22.6	7.7	1.4	6.1	river	OTH	Sand	NO	NO	26.6667	103	Alafia River
TBM2006042609	0	0	0.3	22.8	7.8	4	6.8	river	HAS	Sand	NO	NO	20	103	Alafia River
TBM2006042610	0	0	0.3	22.8	7.8	3.8	8.4	river	STV	Oyst/rock	NO	NO	20	103	Alafia River
TBM2006042611	0	0	0.4	23.2	8.4	2.7	12.7	creek	HAS	Sand	NO	NO	26.6667	103	Rice Creek
TBM2006042612	0	0	0.4	23.3	8.4	2.8	13.1	creek	STV	Sand	YES	NO	20	103	Rice Creek
TBM2006042613	0	0	0.2	22.2	8.3	0.3	11.9	creek	SHT	Sand	YES	YES	6.6667	103	Rice Creek
TBM2006042614	0	0	0.2	22.3	8.3	0.4	9.9	creek	HAS	Sand	YES	NO	0	103	Rice Creek
TBM2006042615	0	0	0.4	23.4	8.6	3.2	16.5	river	HAS	Sand	YES	NO	13.3333	103	Alafia River
TBM2006052301	0	0	0.7	25.3	7.5	21	5.3	bayou	EMM	Sand	YES	NO	13.3333	135	Hayes Bayou
TBM2006052302	0	0	0.6	25.5	7.5	21.2	5.6	bayou	EMM	Sand	YES	NO	13.3333	135	Hayes Bayou
TBM2006052303	0	0	0.4	26.1	7.4	21.5	4.6	bayou	EMM	Sand	YES	NO	6.6667	135	Hayes Bayou
TBM2006052304	0	0	0.4	26.4	7.3	21.7	3.6	bayou	EMM	Mud-sand	YES	NO	0	135	Hayes Bayou
TBM2006052305	0	0	0.7	25.5	7.3	20.3	4	creek	EMM	Mud	YES	NO	20	135	Wildcat Creek
TBM2006052306	0	0	0.8	26	7.3	20.9	4.4	creek	EMM	Mud-sand	YES	NO	33.3333	135	Wildcat Creek
TBM2006052307	0	0	0.5	26.1	7.4	19.5	5.4	creek	EMM	Mud-sand	YES	NO	13.3333	135	Wildcat Creek
TBM2006052308	0	0	0.8	26.5	7.3	19.3	3.9	creek	EMM	Sand	YES	NO	33.3333	135	Wildcat Creek
TBM2006052309	0	0	0.6	25.9	7.2	18	3.5	creek	EMM	Sand	YES	NO	20	135	Wildcat Creek
TBM2006052310	0	0	0.6	24.9	7	16.1	2.7	creek	SHT	Sand	YES	YES	6.6667	135	Wildcat Creek
TBM2006052311	0	0	0.5	26.2	7.2	18.5	3.6	creek	EMM	Sand	YES	NO	13.3333	135	Wildcat Creek
TBM2006052312	0	0	0.6	26.8	7.4	20.7	4.5	creek	EMM	Mud	YES	NO	20	135	Wildcat Creek
TBM2006052313	0	0	0.5	26.8	7.5	21	5.5	creek	EMM	Mud-sand	YES	NO	13.3333	135	Wildcat Creek
TBM2006052314	0	0	0.6	27.6	7.6	21.2	5.9	creek	MAS	Mud	YES	NO	13.3333	135	Wildcat Creek
TBM2006052315	0	0	0.6	26.4	7.6	26.4	5	river	STV	Oyst/rock	YES	NO	33.3333	135	Little Manatee River
TBM2006052316	0	0	0.5	26.2	7.6	26.6	5.1	river	STV	Oyst/rock	YES	NO	26.6667	135	Little Manatee River
TBM2006052317	0	0	0.7	26.3	7.7	26.9	5.2	river	MAS	Sand	YES	YES	13.3333	135	Little Manatee River
TBM2006052318	0	0	0.7	26.9	7.7	26.8	5.4	river	MAS	Oyst/rock	YES	NO	13.3333	135	Little Manatee River
TBM2006052401	0	0	0.7	27.1	7.6	14.9	5	river	EMM	Mud-sand	YES	NO	13.3333	135	Little Manatee River
TBM2006052402	0	0	0.4	26.1	7.3	12.4	4.9	river	EMM	Sand	YES	NO	6.6667	135	Little Manatee River
TBM2006052403	0	0	1	26	7.3	13.8	4.6	creek	EMM	Mud-sand	YES	NO	33.3333	135	Curiosity Creek
TBM2006052404	0	0	1	26.7	7.2	13.8	4.4	creek	EMM	Mud-sand	YES	NO	26.6667	135	Curiosity Creek
TBM2006052405	0	0	0.7	26.4	7.1	13.2	4	creek	EMM	Sand	YES	NO	40	135	Curiosity Creek
TBM2006052406	0	0	0.3	26.5	7.2	12.8	4.6	creek	EMM	Mud-sand	YES	NO	6.6667	135	Curiosity Creek
TBM2006052407	0	0	0.6	26.5	7.2	12.8	4.5	creek	SHT	Sand	YES	YES	20	135	Curiosity Creek
TBM2006052408	0	0	1	26.8	7.2	13.4	4.4	creek	EMM	Mud-sand	NO	YES	46.6667	135	Curiosity Creek
TBM2006052409	0	0	0.9	26.5	7.2	12	4.3	creek	STV	Mud	YES	YES	46.6667	135	Curiosity Creek
TBM2006052410	0	0	0.9	26.6	7.3	12.2	4.9	creek	SHT	Mud	NO	YES	40	135	Curiosity Creek
TBM2006052411	0	0	0.8	26.1	7.2	11	3.9	creek	SHT	Mud-sand	NO	YES	46.6667	135	Curiosity Creek
TBM2006052412	0	0	1	26	7.2	10.6	4	creek	SHT	Mud	NO	YES	26.6667	135	Curiosity Creek
TBM2006052413	0	0	0.8	27.8	7.4	16.1	5.9	river	EMM	Mud	YES	NO	20	135	Little Manatee River
TBM2006052414	0	0	0.7	27.6	7.4	16.6	5.9	river	EMM	Mud-sand	YES	NO	13.3333	135	Little Manatee River
TBM2006052501	0	0	0.7	25.9	7.4	13	4.4	river	HAS	Sand	YES	NO	13.3333	136	Alafia River
TBM2006052502	0	0	0.7	25.8	7.4	13.4	4.1	river	HAS	Oyst/rock	YES	NO	13.3333	136	Alafia River
TBM2006052503	0	0	0.7	25.6	7.5	12	4.3	canal	HAS	Mud	YES	NO	46.6667	136	Question Mark Creek
TBM2006052504	0	0	0.4	25	7.4	11.3	5	canal	SHT	Mud-sand	NO	YES	26.6667	136	Question Mark Creek
TBM2006052505	0	0	0.4	26.1	7.4	13.7	2.6	canal	SHT	Mud-sand	YES	YES	26.6667	136	Question Mark Creek
TBM2006052506	0	0	0.4	26.4	7.3	14	2.7	canal	STV	Mud	NO	NO	26.6667	136	Question Mark Creek
TBM2006052507	0	0	0.5	25.3	7.5	9.1	5.2	river	EMM	Sand	YES	NO	13.3333	136	Alafia River
TBM2006052508	0	0	0.4	25.1	7.4	8.8	5.6	river	EMM	Sand	YES	NO	26.6667	136	Alafia River
TBM2006052509	0	0	0.7	24.7	7.5	3.8	5.2	river	HAS	Sand	YES	NO	20	136	Alafia River
TBM2006052510	0	0	0.8	24.4	7.5	3.8	5.8	river	HAS	Oyst/rock	YES	NO	33.3333	136	Alafia River
TBM2006052511	0	0	0.9	24.6	7.5	3.9	6	canal	HAS	Oyst/rock	YES	NO	20	136	Riverview West Creek
TBM2006052512	0	0	0.9	24.5	7.5	3.7	5.3	canal	HAS	Oyst/rock	YES	NO	20	136	Riverview West Creek
TBM2006052513	0	0	0.9	24.4	7.6	3.5	4.4	canal	STV	Mud-sand	YES	YES	33.3333	136	Riverview West Creek
TBM2006052514	0	0	0.7	24.2	7.6	3.4	5.1	canal	STV	Mud-sand	YES	YES	33.3333	136	Riverview West Creek
TBM2006052515	0	0	0.8	24.7	7.5	4.7	4.6	river	HAS	Oyst/rock	YES	NO	20	136	Alafia River
TBM2006052601	0	0	0.5	23.8	7.2	1.5	3.1	creek	STV	Mud	YES	NO	20	136	Rice Creek
TBM2006052602	0	0	0.4	24.3	7.1	2.3	2	creek	SHT	Mud	YES	YES	13.3333	136	Rice Creek
TBM2006052603	0	0	0.3	22.9	7.3	0.6	4.8	creek	HAS	Mud	YES	NO	13.3333	136	Rice Creek
TBM2006052604	0	0	0.4	22.8	7.6	0.3	4.7	creek	HAS	Mud-sand	YES	NO	0	136	Rice Creek
TBM2006052605	0	0	0.8	24.8	7.3	3.2	3.4	river	HAS	Sand	YES	NO	20	136	Alafia River
TBM2006052606	0	0	0.8	24.7	7.4	2.2	3.7	river	HAS	Mud-sand	YES	NO	13.3333	136	Alafia River
TBM2006052607	0	0	0.3	24.6	7.4	2.2	3.6	river	STV	Sand	NO	NO	13.3333	136	Alafia River
TBM2006052608	0	0	0.3	24.5	7.6	0.9	5.1	river	STV	Sand	YES	NO	20	136	Alafia River
TBM2006052609	0	0	0.5	24.5	7.6	0.9	5.3	river	STV	Sand	YES	NO	20	136	Alafia River
TBM2006052610	0	0	0.6	24.3	7.6	0.8	5.5	river	SHT	Sand	YES	YES	33.3333	136	Alafia River
TBM2006052611	0	0	0.4	24.3	7.6	0.8	5.3	river	SHT	Sand	YES	YES	26.6667	136	Alafia River
TBM2006052612	0	0	0.4	24.2	7.5	1.1	5	canal	SHT	Mud-sand	YES	YES	13.3333	136	Dogleg Creek
TBM2006052613	0	0	0.6	24.2	7.6	1.2	5.3	canal	STV	Mud-sand	YES	YES	6.6667	136	Dogleg Creek
TBM2006052614	0	0	1	24.3	7.5	1.4	4.5	canal	STV	Mud-sand	YES	YES	13.3333	136	Dogleg Creek
TBM2006052615	0	0	0.6	24.2	7.5	1.4	5.2	canal	OTH	Sand	YES	NO	6.6667	136	Dogleg Creek
TBM2006062601	0	0	0.2	25.6	7.4	22.8	4.6	bayou	EMM	Mud-sand	YES	NO	13.3333	158	Hayes Bayou
TBM2006062602	0	0	0.3	26.7	7.5	23.5	4.4	bayou	EMM	Mud-sand	NO	NO	20	158	Hayes Bayou
TBM2006062603	0	0	0.3	27.3	7.6	23.5	4.9	bayou	EMM	Sand	YES	NO	20	158	Hayes Bayou
TBM2006062604	0	0	0.4	26.4	7.5	23.4	5	creek	EMM	Mud-sand	YES	NO	26.6667	158	Wildcat Creek
TBM2006062605	0	0	0.5	26.4	7.5	23.1	4.4	creek	EMM	Mud	YES	NO	26.6667	158	Wildcat Creek
TBM2006062606	0	0	1	26.9	7.3	22	3.6	creek	STV	Mud	NO	NO	66.6667	158	Wildcat Creek
TBM2006062607	0	0	0.9	27	7.3	22.1	3.8	creek	OTH	Mud	YES	YES	60	158	Wildcat Creek
TBM2006062608	1	1	0.6	27.2	7.3	22	3.9	creek	EMM	Mud	YES	NO	33.3333	158	Wildcat Creek
TBM2006062609	0	0	0.5	27.3	7.2	21.2	3.1	creek	EMM	Mud	YES	NO	26.6667	158	Wildcat Creek
TBM2006062610	0	0	0.7	27.4	7.4	21.1	4.9	creek	EMM	Sand	YES	NO	40	158	Wildcat Creek
TBM2006062611	0	0	0.5	27.4	7.3	20.4	4	creek	EMM	Mud-sand	YES	NO	26.6667	158	Wildcat Creek
TBM2006062612	0	0	1	27.6	7.2	20	3.4	creek	EMM	Mud	YES	NO	40	158	Wildcat Creek
TBM2006062613	0	0	0.6	27.7	7.1	19.4	3.6	creek	EMM	Mud	YES	NO	33.3333	158	Wildcat Creek
TBM2006062614	0	0	0.5	29	7.7	23.6	6.8	bayou	EMM	Sand	YES	NO	6.6667	158	Hayes Bayou
TBM2006062615	0	0	0.4	29	7.6	26.8	5.2	river	HAS	Sand	YES	NO	26.6667	158	Little Manatee River
TBM2006062616	0	0	0.5	28.8	7.6	27	5.3	river	MAS	Sand	YES	YES	26.6667	158	Little Manatee River
TBM2006062701	0	0	0.3	27.7	7.1	14	3.8	creek	EMM	Mud	YES	NO	13.3333	158	Curiosity Creek
TBM2006062702	0	0	0.3	27.9	7.1	13.4	3.8	creek	EMM	Mud	YES	NO	13.3333	158	Curiosity Creek
TBM2006062703	0	0	1	27.9	7.1	13	2.7	creek	SHT	Mud-sand	YES	YES	20	158	Curiosity Creek
TBM2006062704	1	1	0.5	27.7	7.1	12.1	2.9	creek	STV	Mud-sand	NO	NO	33.3333	158	Curiosity Creek
TBM2006062705	0	0	0.5	27.5	7.1	11.1	3.2	creek	SHT	Sand	NO	YES	20	158	Curiosity Creek
TBM2006062706	0	0	1	27.8	7.1	11.8	3.3	creek	SHT	Mud-sand	NO	YES	46.6667	158	Curiosity Creek
TBM2006062707	0	0	0.6	28.3	7.1	13.1	3.5	creek	STV	Mud	NO	NO	33.3333	158	Curiosity Creek
TBM2006062708	0	0	1	29.3	7.3	15.9	5.3	creek	EMM	Mud-sand	YES	NO	53.3333	158	Curiosity Creek
TBM2006062709	0	0	0.6	29.9	7.4	16.9	5.5	creek	EMM	Sand	YES	NO	20	158	Curiosity Creek
TBM2006062710	0	0	0.6	30	7.4	17.2	5.5	creek	EMM	Sand	YES	NO	20	158	Curiosity Creek
TBM2006062711	0	0	0.5	29.9	7.4	17.4	5.7	river	EMM	Mud-sand	YES	NO	6.6667	158	Little Manatee River
TBM2006062712	0	0	0.6	29.9	7.4	16.5	5.7	river	EMM	Sand	YES	NO	13.3333	158	Little Manatee River
TBM2006062713	0	0	0.4	30.1	7.4	17.7	6	river	EMM	Sand	YES	NO	6.6667	158	Little Manatee River
TBM2006062714	0	0	0.5	30.1	7.4	18	5.8	river	EMM	Sand	YES	NO	13.3333	158	Little Manatee River
TBM2006062715	0	0	0.6	29.3	7.5	26.4	5.1	river	MAS	Oyst/rock	YES	NO	6.6667	158	Little Manatee River
TBM2006062716	0	0	0.6	29.2	7.5	26.5	4.9	river	MAS	Oyst/rock	YES	YES	6.6667	158	Little Manatee River
TBM2006062801	0	0	0.6	27	8	12.4	5.9	river	EMM	Sand	YES	NO	13.3333	159	Alafia River
TBM2006062802	0	0	0.6	27.5	8.1	13	6.3	river	EMM	Sand	YES	NO	13.3333	159	Alafia River
TBM2006062803	0	0	1	27.8	8	15.3	5.5	river	HAS	Mud-sand	YES	NO	13.3333	159	Alafia River
TBM2006062804	0	0	1	27.7	8.1	15	6.6	river	HAS	Mud-sand	YES	NO	0	159	Alafia River
TBM2006062805	0	0	0.8	28	8	15.7	4.9	canal	HAS	Mud-sand	YES	NO	26.6667	159	Question Mark Creek
TBM2006062806	0	0	1	27.9	7.9	15.5	4	canal	EMM	Mud-sand	YES	NO	33.3333	159	Question Mark Creek
TBM2006062807	0	0	1	28.1	8	15	5.4	canal	HAS	Mud-sand	YES	NO	33.3333	159	Question Mark Creek
TBM2006062808	0	0	1	27.9	8.2	15.1	7	canal	SHT	Mud-sand	YES	YES	26.6667	159	Question Mark Creek
TBM2006062809	0	0	1	28.4	8.3	8.4	10.4	river	HAS	Mud-sand	YES	NO	13.3333	159	Alafia River
TBM2006062810	0	0	1	28.8	8.5	9.3	12.9	river	HAS	Mud-sand	YES	NO	33.3333	159	Alafia River
TBM2006062811	0	0	1	28.9	8.4	8.1	11.9	canal	HAS	Mud-sand	YES	NO	6.6667	159	Riverview West Creek
TBM2006062812	0	0	1	28.8	8.4	8.9	10.5	canal	HAS	Mud-sand	YES	NO	6.6667	159	Riverview West Creek
TBM2006062813	0	0	1	28.9	8.1	8.2	7.3	canal	HAS	Mud	YES	NO	6.6667	159	Riverview West Creek
TBM2006062814	0	0	1	28.8	8.2	8.8	7.9	canal	HAS	Mud	YES	NO	0	159	Riverview West Creek
TBM2006062815	0	0	1	29.6	8.5	9.2	12.5	river	HAS	Sand	YES	NO	13.3333	159	Alafia River
TBM2006062816	0	0	0.8	29.8	8.7	9.1	16.4	river	EMM	Sand	YES	NO	6.6667	159	Alafia River
TBM2006062901	0	0	0.5	26.3	7.7	3.9	6.7	river	HAS	Sand	YES	NO	13.3333	159	Alafia River
TBM2006062902	0	0	0.4	26.3	7.8	3.6	7.3	river	SHT	Sand	NO	YES	20	159	Alafia River
TBM2006062903	0	0	0.4	26.4	7.7	4.1	6.2	river	SHT	Sand	NO	NO	20	159	Alafia River
TBM2006062904	0	0	0.7	26.7	7.9	4	7.8	canal	STV	Mud-sand	YES	NO	13.3333	159	Dogleg Creek
TBM2006062905	0	0	0.7	26.3	8.3	3.8	9.6	canal	SHT	Sand	YES	NO	13.3333	159	Dogleg Creek
TBM2006062906	0	0	1	26.7	8.1	4	8.8	canal	SHT	Sand	NO	NO	46.6667	159	Dogleg Creek
TBM2006062907	0	0	0.9	26.8	7.9	4	8.5	canal	SHT	Mud-sand	YES	YES	40	159	Dogleg Creek
TBM2006062908	0	0	0.6	27.7	7.9	6.1	7.6	river	SHT	Sand	NO	NO	13.3333	159	Alafia River
TBM2006062909	0	0	0.5	28.8	8.5	8.5	13.5	river	HAS	Oyst/rock	YES	NO	33.3333	159	Alafia River
TBM2006062910	0	0	0.5	28.9	8.4	8.9	11	river	STV	Sand	NO	NO	20	159	Alafia River
TBM2006062911	0	0	1	28.7	8.5	8.1	13	creek	HAS	Oyst/rock	YES	NO	0	159	Rice Creek
TBM2006062912	0	0	1	28.5	8.4	7.4	13.5	creek	HAS	Mud-sand	YES	NO	0	159	Rice Creek
TBM2006062913	0	0	1	28.9	8.5	7.7	13.2	creek	STV	Mud-sand	YES	NO	46.6667	159	Rice Creek
TBM2006062914	0	0	0.7	29.2	8.8	7.7	8.6	creek	OTH	Sand	YES	NO	26.6667	159	Rice Creek
TBM2006072301	0	0	0.8	27	7.3	5.9	5.8	bayou	EMM	Mud-sand	YES	NO	20	184	Hayes Bayou
TBM2006072302	0	0	0.6	29	7.2	10.5	4	bayou	EMM	Mud	YES	NO	26.6667	184	Hayes Bayou
TBM2006072303	0	0	0.9	26.9	7	3.6	3.8	creek	EMM	Mud	YES	NO	26.6667	184	Wildcat Creek
TBM2006072304	0	0	0.9	25.8	7.2	0.7	4.8	creek	EMM	Mud	YES	NO	26.6667	184	Wildcat Creek
TBM2006072305	0	0	1	25.6	7.2	0.3	4.8	creek	EMM	Mud	YES	NO	33.3333	184	Wildcat Creek
TBM2006072306	0	0	0.9	25.6	7.4	0.3	5.1	creek	EMM	Mud	YES	NO	6.6667	184	Wildcat Creek
TBM2006072307	0	0	0.7	25.5	7.3	0.2	5.5	creek	STV	Mud	YES	NO	13.3333	184	Wildcat Creek
TBM2006072308	0	0	0.6	25.5	7.1	0.2	4.9	creek	EMM	Mud-sand	YES	NO	20	184	Wildcat Creek
TBM2006072309	0	0	0.7	25.8	7.4	0.3	5.8	creek	SHT	Mud	YES	NO	13.3333	184	Wildcat Creek
TBM2006072310	0	0	0.7	26.5	7.1	0.3	5	creek	EMM	Mud	YES	NO	6.6667	184	Wildcat Creek
TBM2006072311	0	0	0.9	26.4	7.3	0.3	5.5	creek	EMM	Mud	YES	NO	20	184	Wildcat Creek
TBM2006072312	0	0	0.6	27.6	7.1	1	5.1	creek	EMM	Mud	YES	NO	13.3333	184	Wildcat Creek
TBM2006072313	0	0	0.6	30	7.2	6.3	5.4	bayou	EMM	Mud	YES	NO	33.3333	184	Hayes Bayou
TBM2006072314	0	0	0.5	30.5	7.3	6.5	6.6	bayou	EMM	Mud-sand	YES	NO	6.6667	184	Hayes Bayou
TBM2006072315	0	0	0.3	31.1	7.4	8.3	6.1	river	HAS	Sand	YES	NO	20	184	Little Manatee River
TBM2006072316	0	0	0.8	31.4	7.5	8.3	6.4	river	SHT	Sand	YES	NO	26.6667	184	Little Manatee River
TBM2006072401	0	0	1	25.1	7	0.5	4.2	river	EMM	Mud-sand	YES	NO	33.3333	184	Little Manatee River
TBM2006072402	0	0	1.1	24.4	6.6	0.2	4	creek	EMM	Mud	YES	NO	20	184	Curiosity Creek
TBM2006072403	0	0	0.6	24.4	6.8	0.2	4	creek	EMM	Mud	YES	NO	6.6667	184	Curiosity Creek
TBM2006072404	0	0	1.1	24.4	6.5	0.2	4	creek	EMM	Mud	YES	NO	26.6667	184	Curiosity Creek
TBM2006072405	0	0	1	24.4	7.1	0.2	4.3	creek	EMM	Mud-sand	YES	NO	40	184	Curiosity Creek
TBM2006072406	0	0	1	24.4	6.4	0.2	3.7	creek	SHT	Mud	YES	NO	40	184	Curiosity Creek
TBM2006072407	0	0	0.8	24.4	6.8	0.2	3.8	creek	EMM	Mud-sand	YES	NO	20	184	Curiosity Creek
TBM2006072408	0	0	1	24.4	6.8	0.2	3.8	creek	SHT	Mud	YES	YES	13.3333	184	Curiosity Creek
TBM2006072409	0	0	0.8	24.5	6.8	0.2	3.8	creek	SHT	Mud-sand	YES	YES	26.6667	184	Curiosity Creek
TBM2006072410	0	0	0.8	24.6	6.8	0.2	3.8	creek	EMM	Mud-sand	YES	NO	26.6667	184	Curiosity Creek
TBM2006072411	0	0	1	24.7	6.5	0.2	3.7	creek	STV	Mud-sand	YES	NO	33.3333	184	Curiosity Creek
TBM2006072412	0	0	0.5	26.9	7.3	1	4.1	river	EMM	Mud-sand	YES	NO	6.6667	184	Little Manatee River
TBM2006072413	0	0	0.5	27.2	7.3	0.9	4.4	river	EMM	Mud-sand	YES	NO	6.6667	184	Little Manatee River
TBM2006072414	0	0	0.4	25	7.4	0.2	4.2	river	EMM	Mud-sand	YES	NO	6.6667	184	Little Manatee River
TBM2006072415	0	0	0.4	31	7.7	6.7	4.2	river	EMM	Oyst/rock	YES	NO	0	184	Little Manatee River
TBM2006072416	0	0	0.5	31	6.7	7.7	4.2	river	MAS	Oyst/rock	YES	YES	6.6667	184	Little Manatee River
TBM2006072501	0	0	0.9	26.7	7.7	0.8	4.6	river	HAS	Sand	YES	NO	13.3333	186	Alafia River
TBM2006072502	0	0	1	26.8	7.4	0.9	4.4	river	HAS	Oyst/rock	YES	NO	0	186	Alafia River
TBM2006072503	0	0	0.4	27.1	7.2	1	5	canal	EMM	Sand	YES	NO	6.6667	186	Question Mark Creek
TBM2006072504	0	0	1	27.7	7.3	1.4	4.2	canal	SHT	Mud-sand	YES	YES	46.6667	186	Question Mark Creek
TBM2006072505	0	0	1	27.6	7.3	1.6	4	canal	SHT	Sand	YES	YES	40	186	Question Mark Creek
TBM2006072506	0	0	0.6	28.1	7.2	1.2	4.5	canal	MAS	Sand	YES	YES	33.3333	186	Question Mark Creek
TBM2006072507	0	0	0.8	27.4	7.3	1.2	4.3	river	EMM	Sand	YES	NO	26.6667	186	Alafia River
TBM2006072508	0	0	0.9	27.4	7	1.6	4.1	river	EMM	Sand	YES	NO	53.3333	186	Alafia River
TBM2006072509	0	0	0.5	28.1	7.2	0.2	5.7	river	HAS	Oyst/rock	YES	NO	26.6667	186	Alafia River
TBM2006072510	0	0	0.6	27.3	6.8	0.4	4.8	river	HAS	Sand	YES	NO	0	186	Alafia River
TBM2006072511	1	1	0.6	27.8	7	0.4	5.2	canal	EMM	Sand	YES	NO	20	186	Riverview West Creek
TBM2006072512	0	0	0.7	29.1	7.2	0.2	5.3	canal	HAS	Mud-sand	YES	NO	26.6667	186	Riverview West Creek
TBM2006072513	0	0	0.6	29.8	6.9	0.3	6	canal	HAS	Mud	YES	YES	13.3333	186	Riverview West Creek
TBM2006072514	0	0	0.5	30.6	7	0.2	6.8	canal	HAS	Mud	YES	NO	13.3333	186	Riverview West Creek
TBM2006072515	0	0	0.6	28.2	7	0.1	5.5	river	EMM	Sand	YES	NO	20	186	Alafia River
TBM2006072601	0	0	0.6	25.7	7.3	0.1	6.6	river	SHT	Mud-sand	YES	YES	6.6667	186	Alafia River
TBM2006072602	0	0	0.8	25.7	7.4	0.1	6.4	river	SHT	Mud-sand	YES	YES	20	186	Alafia River
TBM2006072603	0	0	0.9	25.9	7.4	0.2	5.8	canal	STV	Mud-sand	YES	YES	6.6667	186	Dogleg Creek
TBM2006072604	0	0	1	26.5	7.3	0.4	4.9	canal	OTH	Mud-sand	NO	YES	13.3333	186	Dogleg Creek
TBM2006072605	0	0	1	27.1	7.4	0.5	6.6	canal	OTH	Mud-sand	YES	YES	20	186	Dogleg Creek
TBM2006072606	0	0	0.5	26	7.3	0.2	5.4	canal	SHT	Sand	YES	YES	6.6667	186	Dogleg Creek
TBM2006072607	0	0	0.3	25.8	7.3	0.1	5.8	river	STV	Sand	YES	NO	13.3333	186	Alafia River
TBM2006072608	0	0	0.6	25.8	7.4	0.1	6.2	river	STV	Sand	YES	NO	13.3333	186	Alafia River
TBM2006072609	0	0	0.5	26.2	7.3	0.1	5.4	river	HAS	Sand	YES	NO	0	186	Alafia River
TBM2006072610	0	0	0.4	24.7	7.4	0.1	7.8	river	STV	Sand	YES	YES	0	186	Alafia River
TBM2006072611	0	0	0.7	26.4	7.3	0.1	5.7	creek	HAS	Mud-sand	YES	YES	26.6667	186	Rice Creek
TBM2006072612	0	0	0.7	25.7	7.6	0.2	7	creek	OTH	Mud-sand	YES	YES	0	186	Rice Creek
TBM2006072613	0	0	0.6	25.1	7.5	0.2	7	creek	HAS	Mud-sand	YES	NO	0	186	Rice Creek
TBM2006072614	0	0	1	26.4	7.4	0.2	5.8	creek	STV	Sand	YES	NO	33.3333	186	Rice Creek
TBM2006072615	0	0	0.7	26.4	7.5	0.1	6	river	EMM	Sand	YES	NO	26.6667	186	Alafia River
TBM2006082301	0	0	1	27.5	7.2	0.5	4.7	canal	HAS	Mud-sand	YES	NO	13.3333	228	Riverview West Creek
TBM2006082302	0	0	0.7	27.7	7.1	0.3	3.5	canal	STV	Mud-sand	YES	YES	0	228	Riverview West Creek
TBM2006082303	0	0	1	27.7	7.1	0.3	3.7	canal	HAS	Mud	YES	NO	13.3333	228	Riverview West Creek
TBM2006082304	0	0	1	27.6	7.1	0.2	3.9	canal	HAS	Mud	YES	NO	26.6667	228	Riverview West Creek
TBM2006082305	0	0	0.9	27.6	7.1	0.4	4	river	HAS	Sand	YES	NO	33.3333	228	Alafia River
TBM2006082306	0	0	0.9	27.6	7	0.9	4.3	river	HAS	Sand	YES	NO	6.6667	228	Alafia River
TBM2006082307	0	0	0.6	28.7	6.8	4.4	3.8	river	EMM	Sand	YES	NO	6.6667	228	Alafia River
TBM2006082308	0	0	0.8	29.4	6.9	4.6	3.9	river	SHT	Sand	YES	YES	20	228	Alafia River
TBM2006082309	0	0	1	30.1	6.9	4.9	3.6	canal	SHT	Sand	YES	YES	33.3333	228	Question Mark Creek
TBM2006082310	0	0	1	29.9	6.9	4.5	3.5	canal	SHT	Sand	YES	YES	33.3333	228	Question Mark Creek
TBM2006082311	2	1	0.6	30.1	6.9	4.9	3.9	canal	SHT	Sand	YES	YES	33.3333	228	Question Mark Creek
TBM2006082312	0	0	0.5	29.1	7	3.3	5.1	canal	SHT	Sand	YES	NO	0	228	Question Mark Creek
TBM2006082313	0	0	0.6	30.3	7	4.6	3.7	river	HAS	Oyst/rock	YES	NO	13.3333	228	Alafia River
TBM2006082314	0	0	0.8	30.1	6.9	4.7	4	river	HAS	Mud-sand	YES	NO	20	228	Alafia River
TBM2006082401	0	0	1	27.4	7.2	0.8	4.2	river	HAS	Oyst/rock	YES	NO	0	228	Alafia River
TBM2006082402	0	0	1	27.2	7.2	0.2	4.1	creek	OTH	Mud	YES	NO	33.3333	228	Rice Creek
TBM2006082403	0	0	1	26.7	7.3	0.2	4.6	creek	STV	Mud	YES	NO	66.6667	228	Rice Creek
TBM2006082404	0	0	0.7	26	7.2	0.2	5.2	creek	STV	Mud-sand	YES	NO	13.3333	228	Rice Creek
TBM2006082405	0	0	0.7	25.7	7.2	0.2	5.4	creek	HAS	Sand	YES	NO	6.6667	228	Rice Creek
TBM2006082406	0	0	0.6	27	7.3	0.2	4.5	river	HAS	Mud	YES	NO	6.6667	228	Alafia River
TBM2006082407	0	0	1	26.9	7.3	0.2	5	river	HAS	Oyst/rock	YES	NO	46.6667	228	Alafia River
TBM2006082408	0	0	0.7	27.2	7.3	0.2	5.6	river	STV	Oyst/rock	YES	NO	20	228	Alafia River
TBM2006082409	1	1	0.6	27.2	7.4	0.2	5.8	river	SHT	Sand	YES	YES	33.3333	228	Alafia River
TBM2006082410	0	0	1	27.4	7.3	0.3	5	canal	STV	Mud	YES	NO	26.6667	228	Dogleg Creek
TBM2006082411	0	0	1	27.6	7.3	0.4	4.7	canal	STV	Mud	NO	NO	46.6667	228	Dogleg Creek
TBM2006082412	0	0	1	27.7	7.3	0.4	4.9	canal	OTH	Sand	YES	NO	40	228	Dogleg Creek
TBM2006082413	0	0	1	28.3	7.4	0.6	5.2	canal	SHT	Sand	YES	YES	26.6667	228	Dogleg Creek
TBM2006082414	0	0	0.5	27.4	7.4	0.2	5.6	river	STV	Sand	YES	YES	13.3333	228	Alafia River
TBM2006082415	0	0	0.5	27.4	7.4	0.2	5.7	river	SHT	Sand	YES	YES	13.3333	228	Alafia River
TBM2006082416	0	0	0.7	28.4	7.3	0.7	5	river	HAS	Mud	YES	NO	20	228	Alafia River
TBM2006082501	0	0	1	28.4	7.3	3	5.4	bayou	EMM	Sand	YES	NO	20	229	Hayes Bayou
TBM2006082502	0	0	1	28.5	7.3	3.1	5.1	bayou	EMM	Sand	YES	NO	13.3333	229	Hayes Bayou
TBM2006082503	0	0	0.9	27.7	7.4	3	5.9	bayou	EMM	Mud	YES	NO	33.3333	229	Hayes Bayou
TBM2006082504	0	0	1	27.8	7.3	3	5.4	bayou	EMM	Sand	YES	NO	40	229	Hayes Bayou
TBM2006082505	0	0	1	28.4	7.4	3	5.8	creek	EMM	Mud-sand	YES	NO	20	229	Wildcat Creek
TBM2006082506	0	0	0.9	28.5	7.4	3	5.9	creek	EMM	Mud	YES	NO	26.6667	229	Wildcat Creek
TBM2006082507	0	0	1	28.9	7.3	3.9	5.4	creek	EMM	Mud	YES	NO	46.6667	229	Wildcat Creek
TBM2006082508	0	0	1.2	28.3	7.4	3.7	5.7	creek	EMM	Mud	YES	NO	66.6667	229	Wildcat Creek
TBM2006082509	0	0	0.9	27.8	7.3	3.2	4.1	creek	EMM	Mud	YES	NO	0	229	Wildcat Creek
TBM2006082510	0	0	1	27	7.5	1	3.6	creek	EMM	Mud-sand	YES	NO	33.3333	229	Wildcat Creek
TBM2006082511	0	0	0.8	26.8	7.3	0.8	3.6	creek	EMM	Mud	YES	NO	13.3333	229	Wildcat Creek
TBM2006082512	0	0	1	26.8	7.4	0.8	3.3	creek	EMM	Mud	YES	NO	20	229	Wildcat Creek
TBM2006082513	0	0	1	26.6	7.4	0.3	3.4	creek	EMM	Mud	YES	NO	33.3333	229	Wildcat Creek
TBM2006082514	0	0	0.9	26.5	7.3	0.3	4	creek	SHT	Mud	YES	NO	26.6667	229	Wildcat Creek
TBM2006082515	0	0	0.3	30.7	7.5	4.4	5.4	river	MAS	Sand	YES	NO	13.3333	229	Little Manatee River
TBM2006082516	0	0	1	30.5	7.5	4.2	5.2	river	EMM	Sand	YES	NO	33.3333	229	Little Manatee River
TBM2006082601	0	0	1	28.5	7.1	0.2	5	river	EMM	Mud-sand	YES	NO	13.3333	229	Little Manatee River
TBM2006082602	0	0	0.8	28.4	7.2	0.2	4.8	river	EMM	Mud-sand	YES	NO	13.3333	229	Little Manatee River
TBM2006082603	0	0	0.9	28.3	7.2	0.2	4.8	river	EMM	Mud-sand	YES	NO	13.3333	229	Little Manatee River
TBM2006082604	0	0	1	28.3	7.3	0.2	4.9	river	EMM	Mud-sand	YES	NO	0	229	Little Manatee River
TBM2006082605	0	0	0.8	27.9	7.4	0.2	5.1	creek	EMM	Mud-sand	YES	NO	0	229	Curiosity Creek
TBM2006082606	0	0	1.2	26.6	7.4	0.2	4.9	creek	STV	Mud-sand	YES	NO	13.3333	229	Curiosity Creek
TBM2006082607	0	0	1	26.3	7.2	0.2	4.7	creek	EMM	Mud-sand	YES	NO	13.3333	229	Curiosity Creek
TBM2006082608	0	0	0.9	26.4	7.4	0.2	4.8	creek	EMM	Mud	YES	NO	6.6667	229	Curiosity Creek
TBM2006082609	0	0	1	26.2	7.4	0.2	5	creek	EMM	Sand	YES	NO	13.3333	229	Curiosity Creek
TBM2006082610	0	0	1	26.1	7.3	0.2	4.8	creek	STV	Mud-sand	YES	NO	13.3333	229	Curiosity Creek
TBM2006082611	0	0	1	26	7.3	0.2	4.9	creek	SHT	Sand	YES	YES	0	229	Curiosity Creek
TBM2006082612	0	0	0.9	26.1	7.4	0.2	4.9	creek	SHT	Sand	YES	YES	6.6667	229	Curiosity Creek
TBM2006082613	0	0	1.1	26.1	7.4	0.2	4.9	creek	SHT	Mud-sand	YES	NO	6.6667	229	Curiosity Creek
TBM2006082614	0	0	0.9	25.9	7.4	0.2	5.4	creek	SHT	Mud	YES	NO	0	229	Curiosity Creek
TBM2006082615	0	0	0.7	30.9	7.5	4.4	6	river	EMM	Oyst/rock	YES	NO	0	229	Little Manatee River
TBM2006082616	0	0	0.8	31	7.5	4.1	6.1	river	MAS	Oyst/rock	YES	YES	13.3333	229	Little Manatee River
TBM2006092201	0	0	0.6	28.6	7.2	0.6	6.6	bayou	EMM	Mud	YES	NO	20	269	Hayes Bayou
TBM2006092202	0	0	0.6	28.6	7.1	0.6	7.5	bayou	EMM	Mud-sand	YES	NO	26.6667	269	Hayes Bayou
TBM2006092203	0	0	0.7	28	7	0.6	9.4	creek	EMM	Mud	YES	NO	20	269	Wildcat Creek
TBM2006092204	0	0	0.6	28.2	7.1	0.6	8.2	creek	EMM	Mud	YES	NO	20	269	Wildcat Creek
TBM2006092205	0	0	0.4	27.1	7	0.4	12.2	creek	EMM	Mud	YES	NO	6.6667	269	Wildcat Creek
TBM2006092206	0	0	0.4	26.9	7	0.3	15.2	creek	EMM	Mud-sand	YES	NO	6.6667	269	Wildcat Creek
TBM2006092207	0	0	0.5	26.7	7	0.3	14.4	creek	EMM	Mud-sand	YES	NO	13.3333	269	Wildcat Creek
TBM2006092208	0	0	0.7	26.3	7	0.3	11.1	creek	OTH	Sand	YES	NO	26.6667	269	Wildcat Creek
TBM2006092209	0	0	0.4	26.8	7.1	0.3	12.8	creek	EMM	Mud-sand	YES	NO	6.6667	269	Wildcat Creek
TBM2006092210	2	1	0.5	27.3	7.1	0.4	14.7	creek	EMM	Mud	YES	NO	20	269	Wildcat Creek
TBM2006092211	2	1	0.4	27.9	7.1	0.6	9.4	creek	EMM	Mud	YES	NO	13.3333	269	Wildcat Creek
TBM2006092212	0	0	0.5	27.6	7.1	0.5	11.8	creek	EMM	Mud-sand	YES	NO	13.3333	269	Wildcat Creek
TBM2006092213	0	0	0.4	30	7	0.7	6.9	bayou	EMM	Mud	YES	NO	26.6667	269	Hayes Bayou
TBM2006092214	0	0	0.5	28.8	7.1	0.6	8.4	bayou	EMM	Mud-sand	YES	NO	13.3333	269	Hayes Bayou
TBM2006092215	0	0	0.8	29.1	7.2	0.8	7.5	river	HAS	Sand	YES	NO	53.3333	269	Little Manatee River
TBM2006092216	0	0	0.6	29.2	7.1	0.8	7.4	river	HAS	Sand	NO	NO	40	269	Little Manatee River
TBM2006092217	0	0	0.5	28.9	6.9	0.5	10.9	river	MAS	Sand	YES	YES	26.6667	269	Little Manatee River
TBM2006092218	0	0	0.6	28.8	7.2	0.5	12.5	river	EMM	Sand	YES	NO	33.3333	269	Little Manatee River
TBM2006092301	0	0	0.6	26.9	6.8	0.1	3.6	river	EMM	Sand	YES	NO	20	269	Little Manatee River
TBM2006092302	0	0	0.4	26.3	6.8	0.2	3.6	river	EMM	Sand	YES	NO	0	269	Little Manatee River
TBM2006092303	0	0	0.9	27	6.3	0.1	3.7	river	EMM	Sand	YES	NO	26.6667	269	Little Manatee River
TBM2006092304	0	0	0.8	27	6.7	0.1	3.7	river	EMM	Sand	YES	NO	26.6667	269	Little Manatee River
TBM2006092305	0	0	0.5	26.2	6.8	0.2	3.4	creek	EMM	Mud-sand	YES	NO	0	269	Curiosity Creek
TBM2006092306	0	0	0.9	26.4	6.8	0.2	3.8	creek	EMM	Mud-sand	YES	NO	26.6667	269	Curiosity Creek
TBM2006092307	0	0	0.8	26.4	6.9	0.2	4	creek	EMM	Mud-sand	YES	NO	20	269	Curiosity Creek
TBM2006092308	0	0	0.9	26.7	6.9	0.2	4.5	creek	EMM	Mud-sand	YES	NO	26.6667	269	Curiosity Creek
TBM2006092309	0	0	0.6	26.2	6.9	0.2	4	creek	STV	Sand	YES	NO	13.3333	269	Curiosity Creek
TBM2006092310	0	0	1	26.5	6.9	0.2	4.2	creek	EMM	Mud-sand	YES	NO	46.6667	269	Curiosity Creek
TBM2006092311	0	0	0.7	26.3	6.9	0.2	4.4	creek	EMM	Mud-sand	NO	NO	33.3333	269	Curiosity Creek
TBM2006092312	0	0	0.4	26.1	7	0.2	4.9	creek	EMM	Mud	YES	NO	0	269	Curiosity Creek
TBM2006092313	1	1	0.5	26.3	6.9	0.2	4.2	creek	SHT	Mud	NO	YES	13.3333	269	Curiosity Creek
TBM2006092314	0	0	0.5	25.9	6.9	0.2	4.7	creek	SHT	Mud	NO	YES	6.6667	269	Curiosity Creek
TBM2006092401	0	0	0.8	26.6	7.3	1.6	4.8	river	HAS	Oyst/rock	YES	NO	13.3333	270	Alafia River
TBM2006092402	0	0	0.9	26.9	7.3	1.7	4.7	river	HAS	Oyst/rock	YES	NO	26.6667	270	Alafia River
TBM2006092403	0	0	0.3	27.4	7.2	1.6	4.6	canal	EMM	Sand	YES	NO	13.3333	270	Question Mark Creek
TBM2006092404	1	1	0.3	27	7.2	1.4	4.1	canal	SHT	Mud-sand	NO	YES	20	270	Question Mark Creek
TBM2006092405	0	0	0.5	27.6	7.2	1.6	3.5	canal	SHT	Mud-sand	YES	YES	20	270	Question Mark Creek
TBM2006092406	0	0	0.7	28	7.2	2.1	3.3	canal	HAS	Mud-sand	YES	NO	46.6667	270	Question Mark Creek
TBM2006092407	0	0	0.4	26.4	7.2	1	4.2	river	EMM	Sand	YES	NO	26.6667	270	Alafia River
TBM2006092408	0	0	0.3	26.1	7.2	0.6	4.3	river	SHT	Sand	YES	NO	13.3333	270	Alafia River
TBM2006092409	0	0	0.3	26	7.3	0.2	5	river	HAS	Mud-sand	YES	NO	13.3333	270	Alafia River
TBM2006092410	0	0	0.5	26.1	7.3	0.2	4.9	river	HAS	Sand	YES	NO	26.6667	270	Alafia River
TBM2006092411	0	0	0.4	26.3	7.3	0.2	4.9	canal	HAS	Mud	YES	NO	13.3333	270	Riverview West Creek
TBM2006092412	0	0	0.3	26.5	7.2	0.2	4	canal	HAS	Mud	YES	NO	13.3333	270	Riverview West Creek
TBM2006092413	0	0	0.1	26.5	7.2	0.2	5.1	canal	HAS	Mud	NO	NO	6.6667	270	Riverview West Creek
TBM2006092414	0	0	0.3	26.4	7.2	0.2	2.7	canal	HAS	Mud	YES	NO	13.3333	270	Riverview West Creek
TBM2006092415	0	0	0.3	26.5	7.4	0.2	5.9	river	HAS	Oyst/rock	YES	NO	13.3333	270	Alafia River
TBM2006092501	0	0	0.4	25.7	7.4	0.2	7.3	river	EMM	Mud-sand	YES	NO	0	270	Alafia River
TBM2006092502	0	0	0.5	25.5	7.6	0.2	7.2	creek	STV	Sand	YES	NO	0	270	Rice Creek
TBM2006092503	0	0	0.5	24.5	7.6	0.1	8.5	creek	STV	Sand	YES	YES	0	270	Rice Creek
TBM2006092504	0	0	0.4	24.5	7.3	0.1	8.1	creek	SHT	Sand	YES	YES	0	270	Rice Creek
TBM2006092505	0	0	0.5	24.5	7.3	0.1	8.2	creek	STV	Sand	NO	NO	13.3333	270	Rice Creek
TBM2006092506	0	0	0.4	25.7	7.3	0.2	7.6	river	SHT	Sand	NO	NO	26.6667	270	Alafia River
TBM2006092507	1	1	0.4	25.9	7.6	0.2	7.1	river	SHT	Sand	YES	YES	20	270	Alafia River
TBM2006092508	0	0	0.6	25.9	7.5	0.2	6.4	river	STV	Sand	NO	NO	40	270	Alafia River
TBM2006092510	0	0	0.9	26.1	7.4	0.4	5.6	canal	SHT	Oyst/rock	NO	NO	26.6667	270	Dogleg Creek
TBM2006092511	0	0	0.6	26.3	7.4	0.5	5.7	canal	OTH	Mud	NO	YES	33.3333	270	Dogleg Creek
TBM2006092512	0	0	0.7	26.4	7.4	0.5	5.3	canal	OTH	Mud	NO	YES	26.6667	270	Dogleg Creek
TBM2006092513	0	0	0.6	26.3	7.5	0.5	5.5	canal	OTH	Sand	NO	NO	40	270	Dogleg Creek
TBM2006092514	0	0	0.6	26.1	7.5	0.2	6.9	river	SHT	Sand	YES	NO	40	270	Alafia River
TBM2006092515	0	0	0.7	26.1	7.5	0.2	6.6	river	SHT	Mud-sand	NO	YES	40	270	Alafia River
TBM2006102001	1	1	0.4	24.3	7.2	0.8	3.8	creek	EMM	Mud-sand	YES	NO	6.6667	282	Wildcat Creek
TBM2006102002	0	0	0.6	24.3	7.3	0.5	4.3	creek	EMM	Mud-sand	YES	NO	13.3333	282	Wildcat Creek
TBM2006102003	1	1	0.4	24.5	7.2	1.3	4.4	creek	EMM	Mud-sand	YES	NO	6.6667	282	Wildcat Creek
TBM2006102004	1	1	0.4	24.4	7.2	1.3	4.3	creek	EMM	Mud-sand	YES	NO	6.6667	282	Wildcat Creek
TBM2006102005	0	0	0.6	24.5	7.3	1.4	4.9	creek	MAS	Mud-sand	YES	NO	20	282	Wildcat Creek
TBM2006102006	1	1	0.7	24.5	7.2	1.5	4.5	creek	EMM	Mud-sand	YES	NO	20	282	Wildcat Creek
TBM2006102007	1	1	0.3	24.5	7.2	2.1	5	creek	EMM	Mud-sand	YES	NO	6.6667	282	Wildcat Creek
TBM2006102008	1	1	0.3	24.6	7.3	2.2	5.2	creek	EMM	Mud-sand	YES	NO	13.3333	282	Wildcat Creek
TBM2006102009	2	1	0.2	24.7	7.3	3	5.4	creek	EMM	Mud-sand	YES	NO	6.6667	282	Wildcat Creek
TBM2006102010	2	1	0.4	24.8	7.3	2.5	5.6	creek	EMM	Mud	NO	NO	20	282	Wildcat Creek
TBM2006102011	1	1	0.2	25.2	7.4	6.3	7.1	bayou	EMM	Mud	NO	NO	6.6667	282	Hayes Bayou
TBM2006102012	1	1	0.2	26.9	7.3	6	5.8	bayou	EMM	Mud	NO	NO	13.3333	282	Hayes Bayou
TBM2006102013	0	0	0.3	25.7	7.4	5.6	7.2	bayou	EMM	Mud	YES	NO	13.3333	282	Hayes Bayou
TBM2006102014	1	1	0.2	26.6	7.6	6.3	8	bayou	EMM	Mud	YES	NO	6.6667	282	Hayes Bayou
TBM2006102015	0	0	0.4	27.2	7.4	4	5.9	river	HAS	Mud-sand	NO	NO	26.6667	282	Little Manatee River
TBM2006102016	0	0	0.3	27.1	7.5	3.3	5.8	river	OTH	Mud-sand	NO	NO	20	282	Little Manatee River
TBM2006102017	0	0	0.3	27.3	7.6	2.6	6.6	river	MAS	Oyst/rock	NO	YES	20	282	Little Manatee River
TBM2006102018	0	0	0.3	27.4	7.5	2.5	6.4	river	EMM	Oyst/rock	NO	NO	20	282	Little Manatee River
TBM2006102101	0	0	0.5	24.9	7.5	0.6	6	creek	EMM	Sand	YES	NO	0	282	Curiosity Creek
TBM2006102102	0	0	1	24.7	7.4	0.6	7.2	creek	EMM	Mud	YES	NO	33.3333	282	Curiosity Creek
TBM2006102103	0	0	0.8	24.6	7.3	0.5	7.6	creek	EMM	Mud-sand	YES	NO	20	282	Curiosity Creek
TBM2006102104	0	0	0.5	24.3	7.3	0.5	8.2	creek	EMM	Sand	YES	NO	13.3333	282	Curiosity Creek
TBM2006102105	1	1	0.2	24.2	7.5	0.4	9.3	creek	SHT	Sand	NO	YES	13.3333	282	Curiosity Creek
TBM2006102106	0	0	0.6	23.7	7.7	0.4	9.5	creek	EMM	Mud	YES	NO	26.6667	282	Curiosity Creek
TBM2006102107	0	0	0.6	23.7	7.5	0.4	10.5	creek	STV	Sand	YES	NO	20	282	Curiosity Creek
TBM2006102108	0	0	0.8	23.9	7.3	0.4	9.5	creek	STV	Mud-sand	YES	YES	46.6667	282	Curiosity Creek
TBM2006102109	5	1	0.8	23.9	7.3	0.4	10.6	creek	STV	Sand	YES	NO	53.3333	282	Curiosity Creek
TBM2006102110	0	0	0.8	24.5	7.3	0.4	9.6	creek	EMM	Mud	YES	NO	53.3333	282	Curiosity Creek
TBM2006102111	0	0	0.1	25.4	7.6	0.4	8.9	river	EMM	Sand	YES	NO	6.6667	282	Little Manatee River
TBM2006102112	1	1	0.1	25.6	7.8	0.5	7.9	river	EMM	Sand	YES	NO	6.6667	282	Little Manatee River
TBM2006102113	0	0	0.3	26.1	7.8	0.8	10.1	river	EMM	Sand	YES	NO	13.3333	282	Little Manatee River
TBM2006102114	1	1	0.4	25.8	7.6	0.3	12.9	river	EMM	Sand	YES	NO	26.6667	282	Little Manatee River
TBM2006102201	0	0	0.4	24.3	7.8	7.2	7.4	river	HAS	Sand	YES	NO	13.3333	283	Alafia River
TBM2006102202	0	0	0.5	24	7.7	6.6	7.2	river	HAS	Mud-sand	YES	NO	6.6667	283	Alafia River
TBM2006102203	2	1	0.3	24.4	7.9	8.5	8.1	canal	SHT	Mud-sand	NO	YES	20	283	Question Mark Creek
TBM2006102204	0	0	0.3	24.6	7.9	8.5	8.1	canal	SHT	Sand	NO	NO	20	283	Question Mark Creek
TBM2006102205	0	0	0.2	25.2	7.8	8.4	7.7	canal	SHT	Mud-sand	NO	YES	13.3333	283	Question Mark Creek
TBM2006102206	0	0	0.3	25	7.7	8.1	7.1	canal	HAS	Mud	NO	NO	20	283	Question Mark Creek
TBM2006102207	0	0	0.2	25.4	7.6	6	7.2	river	SHT	Mud-sand	NO	YES	13.3333	283	Alafia River
TBM2006102208	0	0	0.3	25.7	7.7	6.3	7.1	river	EMM	Mud-sand	NO	NO	20	283	Alafia River
TBM2006102209	0	0	0.5	25.2	7.7	1.4	7.8	river	HAS	Mud-sand	YES	NO	33.3333	283	Alafia River
TBM2006102210	0	0	0.2	25.4	7.7	1.4	8.5	river	HAS	Mud-sand	NO	NO	13.3333	283	Alafia River
TBM2006102211	0	0	0.3	25	7.6	1.6	8.2	canal	STV	Mud	NO	NO	20	283	Riverview West Creek
TBM2006102212	0	0	0.3	25.2	7.7	1.7	7.6	canal	HAS	Mud	NO	NO	20	283	Riverview West Creek
TBM2006102213	0	0	0.2	26.3	7.7	1.5	6.7	canal	HAS	Mud	YES	NO	13.3333	283	Riverview West Creek
TBM2006102214	0	0	0.2	26.3	7.7	1.5	6.7	canal	STV	Mud	NO	NO	13.3333	283	Riverview West Creek
TBM2006102215	0	0	0.2	23.7	8.2	1.4	4.4	river	HAS	Mud	NO	NO	13.3333	283	Alafia River
TBM2006102301	0	0	0.7	23.9	7.6	1	6.7	river	HAS	Oyst/rock	YES	NO	13.3333	282	Alafia River
TBM2006102302	0	0	0.5	21.6	7.7	0.2	8.4	creek	OTH	Mud-sand	YES	NO	20	282	Rice Creek
TBM2006102303	0	0	0.5	19.9	7.5	0.2	8.6	creek	HAS	Oyst/rock	YES	NO	13.3333	282	Rice Creek
TBM2006102304	0	0	0.3	19.7	7.6	0.2	8.7	creek	SHT	Sand	YES	YES	0	282	Rice Creek
TBM2006102305	0	0	0.2	19.7	7.4	0.2	8.6	creek	STV	Mud-sand	NO	NO	13.3333	282	Rice Creek
TBM2006102306	0	0	1	23.6	7.6	0.4	9.8	river	HAS	Mud-sand	YES	NO	33.3333	282	Alafia River
TBM2006102307	0	0	0.7	23.6	7.6	0.4	9.1	river	HAS	Sand	YES	NO	40	282	Alafia River
TBM2006102308	0	0	0.9	23.3	7.7	0.2	10.6	river	HAS	Mud-sand	NO	NO	60	282	Alafia River
TBM2006102309	0	0	0.6	23.3	7.6	0.2	9.8	river	STV	Mud-sand	NO	NO	40	282	Alafia River
TBM2006102310	0	0	0.4	23.7	7.6	0.5	8.3	canal	STV	Mud	NO	NO	26.6667	282	Dogleg Creek
TBM2006102311	0	0	0.3	23.7	7.8	0.5	7.5	canal	SHT	Mud	NO	YES	20	282	Dogleg Creek
TBM2006102312	0	0	0.8	23.9	7.6	0.5	8.3	canal	OTH	Mud	NO	NO	53.3333	282	Dogleg Creek
TBM2006102313	0	0	0.6	23.8	7.7	0.5	8	canal	OTH	Mud	NO	NO	40	282	Dogleg Creek
TBM2006102314	0	0	0.7	23.6	8	0.2	8.4	river	SHT	Mud-sand	NO	YES	46.6667	282	Alafia River
TBM2006102315	0	0	0.8	23.6	8	0.2	7.6	river	STV	Mud	NO	NO	53.3333	282	Alafia River
TBM2006112201	0	0	0.6	20.9	7.4	9.4	6.2	river	HAS	Mud-sand	YES	NO	6.6667	318	Alafia River
TBM2006112202	0	0	0.5	21.7	7.3	10.7	6.8	river	SHT	Oyst/rock	YES	YES	6.6667	318	Alafia River
TBM2006112203	0	0	0.3	21	7.4	9.8	6.2	canal	SHT	Sand	YES	YES	13.3333	318	Question Mark Creek
TBM2006112204	0	0	0.6	20.7	7.4	9.4	6.4	canal	SHT	Mud-sand	YES	YES	33.3333	318	Question Mark Creek
TBM2006112205	0	0	0.6	20	7.4	8.7	7.4	canal	SHT	Mud-sand	YES	YES	40	318	Question Mark Creek
TBM2006112206	0	0	0.5	21	7.3	9.7	5.6	canal	EMM	Sand	YES	NO	20	318	Question Mark Creek
TBM2006112207	0	0	0.5	21.2	7.6	7.9	9.1	river	EMM	Sand	YES	NO	6.6667	318	Alafia River
TBM2006112208	0	0	0.4	21.3	7.6	7.3	8.5	river	EMM	Mud-sand	YES	NO	6.6667	318	Alafia River
TBM2006112209	0	0	0.7	20.7	7.5	2.6	7.2	river	HAS	Oyst/rock	YES	NO	20	318	Alafia River
TBM2006112210	0	0	0.5	20.8	7.5	2.6	6.8	river	HAS	Oyst/rock	YES	NO	6.6667	318	Alafia River
TBM2006112211	0	0	0.8	19.9	7.4	2.7	6.3	canal	HAS	Mud	NO	YES	26.6667	318	Riverview West Creek
TBM2006112212	0	0	0.4	21	7.5	2.8	6.3	canal	HAS	Mud	YES	NO	0	318	Riverview West Creek
TBM2006112213	1	1	0.5	21.4	7.5	2.8	7	canal	HAS	Mud	YES	NO	26.6667	318	Riverview West Creek
TBM2006112214	0	0	0.5	20.9	7.5	2.9	6.2	canal	HAS	Mud	YES	NO	6.6667	318	Riverview West Creek
TBM2006112215	0	0	0.4	21.5	7.5	2.8	7.2	river	HAS	Sand	YES	NO	6.6667	318	Alafia River
TBM2006112301	0	0	0.5	19.1	7.5	2.1	6.4	river	EMM	Sand	YES	NO	20	318	Alafia River
TBM2006112302	0	0	0.3	19.1	7.4	2.1	7	river	SHT	Oyst/rock	NO	YES	13.3333	318	Alafia River
TBM2006112303	0	0	0.3	18.6	7.3	1.7	5.7	creek	SHT	Mud-sand	YES	YES	0	318	Rice Creek
TBM2006112304	0	0	0.5	17.9	7.3	1.1	5.9	creek	SHT	Mud-sand	NO	YES	13.3333	318	Rice Creek
TBM2006112305	0	0	0.4	17.6	7.4	1	5.5	creek	SHT	Sand	NO	YES	0	318	Rice Creek
TBM2006112306	0	0	0.5	18.8	7.3	1.8	5.8	creek	EMM	Mud-sand	NO	YES	13.3333	318	Rice Creek
TBM2006112307	0	0	0.2	19.2	7.4	1.7	6.6	river	SHT	Sand	NO	YES	6.6667	318	Alafia River
TBM2006112308	0	0	0.4	19.6	7.6	0.9	6.7	river	OTH	Sand	NO	NO	26.6667	318	Alafia River
TBM2006112309	0	0	0.4	19.5	7.5	1.1	6.6	canal	SHT	Mud-sand	NO	YES	13.3333	318	Dogleg Creek
TBM2006112310	0	0	0.9	20	7.5	1.3	5.5	canal	SHT	Mud-sand	NO	YES	40	318	Dogleg Creek
TBM2006112311	0	0	1	19.8	7.5	1.2	6.1	canal	SHT	Mud-sand	NO	YES	46.6667	318	Dogleg Creek
TBM2006112312	0	0	1	19.9	7.6	1.2	6.4	canal	SHT	Mud-sand	NO	YES	46.6667	318	Dogleg Creek
TBM2006112313	0	0	0.4	20.2	7.6	1	7.1	river	SHT	Sand	NO	YES	13.3333	318	Alafia River
TBM2006112314	0	0	0.4	20.2	7.7	0.7	6.8	river	STV	Sand	NO	YES	13.3333	318	Alafia River
TBM2006112315	0	0	0.5	20.4	7.7	1	6.9	river	SHT	Oyst/rock	NO	YES	13.3333	318	Alafia River
TBM2006112501	0	0	0.2	19.3	7.4	13.5	5.5	bayou	EMM	Mud	NO	NO	13.3333	321	Hayes Bayou
TBM2006112502	1	1	0.4	18.9	7.4	2	5.6	creek	EMM	Mud	NO	NO	20	321	Wildcat Creek
TBM2006112503	0	0	0.2	18.8	7.5	2	6.9	creek	EMM	Mud	NO	NO	6.6667	321	Wildcat Creek
TBM2006112504	0	0	0.6	18.8	7.4	1.8	5.8	creek	MAS	Mud	NO	YES	40	321	Wildcat Creek
TBM2006112505	0	0	0.2	18.9	7.4	1.6	6.3	creek	EMM	Mud	NO	NO	0	321	Wildcat Creek
TBM2006112506	0	0	0.5	18.9	7.4	1.5	6.8	creek	EMM	Mud	NO	NO	33.3333	321	Wildcat Creek
TBM2006112507	1	1	0.4	18.9	7.3	1.4	5.6	creek	EMM	Mud	NO	NO	20	321	Wildcat Creek
TBM2006112508	0	0	0.3	18.9	7.4	1.3	5.7	creek	EMM	Mud	NO	NO	6.6667	321	Wildcat Creek
TBM2006112509	0	0	0.7	19	7.4	1.3	5.7	creek	EMM	Mud	NO	NO	46.6667	321	Wildcat Creek
TBM2006112510	0	0	0.3	19.1	7.4	1.3	5.6	creek	EMM	Mud	NO	NO	20	321	Wildcat Creek
TBM2006112511	0	0	0.6	19.5	7.4	2	7.4	creek	EMM	Mud	NO	NO	26.6667	321	Wildcat Creek
TBM2006112512	0	0	0.2	22	7.4	14.3	6.8	bayou	EMM	Mud	NO	NO	13.3333	321	Hayes Bayou
TBM2006112513	0	0	0.3	19.7	7.5	5.5	7.4	bayou	EMM	Mud	NO	NO	20	321	Hayes Bayou
TBM2006112514	0	0	0.4	19.7	7.5	6.2	8	bayou	EMM	Mud-sand	YES	NO	20	321	Hayes Bayou
TBM2006112515	0	0	0.4	21.6	7.3	10.7	6.2	river	OTH	Sand	NO	NO	26.6667	321	Little Manatee River
TBM2006112516	0	0	0.4	21.5	7.3	11.3	6.1	river	HAS	Sand	NO	NO	26.6667	321	Little Manatee River
TBM2006112517	0	0	0.4	21.6	7.4	11.3	6.2	river	MAS	Oyst/rock	YES	YES	13.3333	321	Little Manatee River
TBM2006112518	0	0	0.5	21.7	7.4	11.2	6.5	river	EMM	Oyst/rock	YES	NO	20	321	Little Manatee River
TBM2006112601	2	1	0.3	19.3	7.5	2.6	5.7	river	EMM	Mud-sand	YES	NO	13.3333	321	Little Manatee River
TBM2006112602	0	0	0.2	19.3	7.1	2	6.3	river	EMM	Mud-sand	NO	NO	13.3333	321	Little Manatee River
TBM2006112603	1	1	0.3	19.3	7.2	1.8	6.3	river	EMM	Mud-sand	NO	NO	20	321	Little Manatee River
TBM2006112604	0	0	0.4	19.1	7.1	1.9	5.6	river	OTH	Sand	NO	NO	26.6667	321	Little Manatee River
TBM2006112605	1	1	0.4	19.2	7.2	1.9	6.5	creek	EMM	Mud-sand	YES	NO	20	321	Curiosity Creek
TBM2006112606	0	0	0.2	19.3	7.2	1.8	7.4	creek	EMM	Sand	YES	NO	6.6667	321	Curiosity Creek
TBM2006112607	0	0	0.9	19.3	7.2	1.8	6	creek	EMM	Sand	NO	NO	46.6667	321	Curiosity Creek
TBM2006112608	0	0	0.3	19.7	7.2	1.8	6.4	creek	EMM	Sand	YES	NO	13.3333	321	Curiosity Creek
TBM2006112609	0	0	1	19.8	7.2	1.7	6.4	creek	EMM	Mud-sand	NO	NO	60	321	Curiosity Creek
TBM2006112610	0	0	1	19.8	7.3	1.8	6.9	creek	STV	Mud-sand	YES	YES	40	321	Curiosity Creek
TBM2006112611	0	0	0.8	19.9	7.4	1.1	6	creek	SHT	Mud-sand	NO	NO	40	321	Curiosity Creek
TBM2006112612	0	0	0.4	20.1	7.3	1.1	6.1	creek	SHT	Sand	NO	NO	13.3333	321	Curiosity Creek
TBM2006112613	0	0	0.5	20.1	7.2	1	5.8	creek	SHT	Sand	NO	NO	33.3333	321	Curiosity Creek
TBM2006112614	0	0	0.4	20.2	7.3	1	5.8	creek	SHT	Mud-sand	NO	NO	20	321	Curiosity Creek
TBM2006122001	0	0	0.3	18.2	7.6	16.1	7.2	bayou	EMM	Mud-sand	YES	NO	6.6667	345	Hayes Bayou
TBM2006122002	0	0	0.3	17.8	7.6	16	6.9	bayou	EMM	Mud-sand	YES	NO	6.6667	345	Hayes Bayou
TBM2006122003	0	0	0.5	17.4	7.6	16.3	7.2	creek	EMM	Mud	YES	NO	13.3333	345	Wildcat Creek
TBM2006122004	0	0	0.5	17.6	7.6	16.6	7.1	creek	EMM	Mud	YES	NO	13.3333	345	Wildcat Creek
TBM2006122005	0	0	0.9	18	7.5	16.6	7	creek	EMM	Mud-sand	YES	NO	26.6667	345	Wildcat Creek
TBM2006122006	0	0	0.3	18.1	7.5	16.4	6.2	creek	EMM	Mud-sand	YES	NO	6.6667	345	Wildcat Creek
TBM2006122007	0	0	0.3	18.4	7.5	10.3	7	creek	EMM	Mud	YES	NO	6.6667	345	Wildcat Creek
TBM2006122008	0	0	0.2	18.6	7.4	4.1	6.5	creek	EMM	Mud-sand	YES	NO	0	345	Wildcat Creek
TBM2006122009	0	0	0.5	18.7	7.4	4.2	6.7	creek	EMM	Mud-sand	YES	NO	20	345	Wildcat Creek
TBM2006122010	0	0	0.3	18.7	7.4	4.5	6.2	creek	EMM	Mud-sand	YES	NO	13.3333	345	Wildcat Creek
TBM2006122011	1	1	0.3	19.7	7.6	5.8	9.2	creek	EMM	Mud-sand	YES	NO	13.3333	345	Wildcat Creek
TBM2006122012	0	0	0.5	19.6	7.4	8	7.1	creek	MAS	Mud	YES	NO	26.6667	345	Wildcat Creek
TBM2006122013	0	0	0.3	19.2	7.9	14.7	9.4	bayou	EMM	Sand	YES	NO	6.6667	345	Hayes Bayou
TBM2006122014	0	0	0.3	19.5	7.9	14.7	9.6	bayou	EMM	Sand	YES	NO	13.3333	345	Hayes Bayou
TBM2006122015	0	0	0.3	18.4	7.9	15.3	9.2	river	HAS	Oyst/rock	NO	NO	20	345	Little Manatee River
TBM2006122016	0	0	0.3	18.5	7.8	15.2	9.3	river	HAS	Sand	NO	NO	20	345	Little Manatee River
TBM2006122017	0	0	0.4	19.5	7.3	15.6	9	river	MAS	Mud-sand	YES	YES	20	345	Little Manatee River
TBM2006122101	0	0	0.3	16.9	7.7	7.5	8.5	river	EMM	Sand	YES	NO	6.6667	345	Little Manatee River
TBM2006122102	0	0	0.4	17.1	7.6	7.4	8.2	river	EMM	Sand	YES	NO	6.6667	345	Little Manatee River
TBM2006122103	0	0	1	17.2	7.6	7.6	8.3	river	EMM	Sand	YES	NO	46.6667	345	Little Manatee River
TBM2006122104	0	0	0.5	16.9	7.7	4.8	8.2	creek	EMM	Sand	YES	NO	13.3333	345	Curiosity Creek
TBM2006122105	0	0	1	17.1	7.6	4.9	8	creek	EMM	Mud-sand	YES	NO	46.6667	345	Curiosity Creek
TBM2006122106	0	0	0.4	17.3	7.7	3.2	8.7	creek	EMM	Sand	YES	NO	6.6667	345	Curiosity Creek
TBM2006122107	0	0	0.4	17.3	7.8	3.1	9.5	creek	EMM	Mud-sand	YES	NO	13.3333	345	Curiosity Creek
TBM2006122108	0	0	0.6	17	7.8	1.3	8.3	creek	EMM	Sand	YES	NO	33.3333	345	Curiosity Creek
TBM2006122109	0	0	0.5	16.9	7.8	1	8.5	creek	SHT	Mud-sand	NO	YES	20	345	Curiosity Creek
TBM2006122110	0	0	0.5	16.8	7.8	0.8	9.3	creek	SHT	Sand	YES	YES	0	345	Curiosity Creek
TBM2006122111	0	0	0.8	16.8	7.9	0.6	9.1	creek	STV	Sand	YES	NO	53.3333	345	Curiosity Creek
TBM2006122112	0	0	0.5	17.4	7.8	0.9	8.7	creek	SHT	Mud-sand	NO	NO	33.3333	345	Curiosity Creek
TBM2006122113	0	0	0.8	18.4	7.7	3	8.5	creek	EMM	Mud-sand	NO	NO	46.6667	345	Curiosity Creek
TBM2006122114	0	0	0.2	19	7.7	6.3	9.3	river	EMM	Sand	YES	NO	6.6667	345	Little Manatee River
TBM2006122115	0	0	0.4	19.3	7.7	15.4	9.2	river	MAS	Oyst/rock	NO	NO	26.6667	345	Little Manatee River
TBM2006122501	0	0	0.5	19.8	7.8	5.2	6.7	river	HAS	Oyst/rock	YES	NO	6.6667	348	Alafia River
TBM2006122502	0	0	0.7	20.1	7.5	5.1	6	canal	HAS	Mud	YES	NO	20	348	Riverview West Creek
TBM2006122503	0	0	0.6	19.8	7.5	4.7	6	canal	HAS	Mud	YES	NO	6.6667	348	Riverview West Creek
TBM2006122504	0	0	0.5	19.9	7.5	5.1	5.8	canal	HAS	Mud	YES	NO	6.6667	348	Riverview West Creek
TBM2006122505	0	0	0.5	20	7.5	4.1	5.3	canal	HAS	Oyst/rock	YES	NO	20	348	Riverview West Creek
TBM2006122506	0	0	0.4	19.8	7.6	4.4	6.8	river	HAS	Sand	YES	NO	13.3333	348	Alafia River
TBM2006122507	0	0	0.6	19.9	7.6	4.4	6.8	river	HAS	Mud-sand	YES	NO	13.3333	348	Alafia River
TBM2006122508	0	0	0.8	19.9	7.5	11.2	6.5	river	HAS	Mud-sand	YES	NO	20	348	Alafia River
TBM2006122509	0	0	0.6	20	7.6	11.3	6.7	river	HAS	Oyst/rock	YES	NO	13.3333	348	Alafia River
TBM2006122510	0	0	0.7	20.1	7.6	8.8	6.8	canal	SHT	Mud	YES	YES	20	348	Question Mark Creek
TBM2006122511	0	0	0.5	20.2	7.6	9.9	6.3	canal	SHT	Mud-sand	NO	YES	6.6667	348	Question Mark Creek
TBM2006122512	0	0	0.3	20.2	7.6	9.8	6.7	canal	SHT	Sand	NO	NO	13.3333	348	Question Mark Creek
TBM2006122513	0	0	1	19.9	7.5	9.7	5.9	canal	SHT	Mud-sand	YES	YES	13.3333	348	Question Mark Creek
TBM2006122514	0	0	0.5	20.3	7.6	13	7.1	river	EMM	Sand	YES	NO	13.3333	348	Alafia River
TBM2006122515	0	0	0.5	20.3	7.6	13	7.3	river	EMM	Sand	YES	NO	20	348	Alafia River
TBM2006122601	0	0	1	19.7	7.5	4.7	6.3	river	HAS	Sand	YES	NO	26.6667	348	Alafia River
TBM2006122602	0	0	0.7	19.4	7.6	2.9	6.8	creek	OTH	Sand	YES	NO	26.6667	348	Rice Creek
TBM2006122603	0	0	0.6	19.4	7.5	2.8	6.8	creek	OTH	Sand	YES	NO	20	348	Rice Creek
TBM2006122604	0	0	0.4	19.7	7.4	3.3	5.5	creek	HAS	Mud-sand	YES	NO	13.3333	348	Rice Creek
TBM2006122605	0	0	0.4	19.3	7.5	0.2	7.5	creek	STV	Mud-sand	YES	NO	0	348	Rice Creek
TBM2006122606	0	0	0.5	19.7	7.6	3	6.7	river	SHT	Sand	NO	YES	33.3333	348	Alafia River
TBM2006122607	0	0	0.4	19.7	7.6	3.1	6.7	river	HAS	Sand	YES	NO	20	348	Alafia River
TBM2006122608	0	0	0.5	20	7.6	2.1	6.8	river	STV	Sand	NO	NO	33.3333	348	Alafia River
TBM2006122609	0	0	0.4	20.6	7.6	2.2	6.7	river	STV	Sand	YES	YES	13.3333	348	Alafia River
TBM2006122610	0	0	0.6	20.2	7.6	2.2	6.4	canal	STV	Sand	NO	NO	26.6667	348	Dogleg Creek
TBM2006122611	0	0	1	20.1	7.6	2.3	6.4	canal	SHT	Oyst/rock	NO	NO	46.6667	348	Dogleg Creek
TBM2006122612	0	0	0.9	20.4	7.5	2.7	5.6	canal	OTH	Sand	NO	NO	20	348	Dogleg Creek
TBM2006122613	0	0	0.9	20.3	7.6	2.5	6.2	canal	OTH	Sand	NO	NO	40	348	Dogleg Creek
TBM2006122614	0	0	0.7	20.1	7.6	2.5	6.6	river	STV	Sand	YES	NO	33.3333	348	Alafia River
TBM2006122615	0	0	0.4	20.3	7.6	2	6.8	river	STV	Sand	NO	NO	26.6667	348	Alafia River
TBM2007012201	0	0	0.8	16.1	8	27.4	7.6	creek	MAS	Mud	NO	YES	53.3333	12	Cockroach Creek
TBM2007012202	0	0	0.2	17	7.6	22.2	6.3	creek	MAS	Mud	YES	YES	6.6667	12	Cockroach Creek
TBM2007012203	0	0	0.6	16.8	7.7	23.9	5.1	creek	MAS	Mud	NO	YES	33.3333	12	Cockroach Creek
TBM2007012204	0	0	0.3	18	7.4	20.3	3.5	creek	MAS	Mud	NO	YES	20	12	Cockroach Creek
TBM2007012205	0	0	0.8	19.4	7.2	21.7	2.1	creek	MAS	Mud	NO	YES	53.3333	12	Cockroach Creek
TBM2007012206	0	0	0.4	18.6	7.3	20.1	2.9	creek	MAS	Mud	NO	YES	26.6667	12	Cockroach Creek
TBM2007012207	0	0	0.8	18	7.3	16.6	3.6	creek	MAS	Mud	NO	YES	53.3333	12	Cockroach Creek
TBM2007012208	0	0	0.6	17.6	7.2	14.7	3.5	creek	MAS	Mud	YES	YES	33.3333	12	Cockroach Creek
TBM2007012209	0	0	0.6	18	7.7	24.8	5.1	creek	MAS	Mud	NO	YES	26.6667	12	Cockroach Creek
TBM2007012210	0	0	0.2	17	8	26.8	6.7	creek	MAS	Mud	YES	YES	6.6667	12	Cockroach Creek
TBM2007012211	0	0	0.5	17.3	8	8.5	8.2	creek	MAS	Mud-sand	NO	YES	33.3333	12	Andrews Creek
TBM2007012212	2	1	0.5	18	8	7.6	9.5	creek	MAS	Mud	NO	YES	33.3333	12	Andrews Creek
TBM2007012213	0	0	0.2	18.4	8.1	10.1	9.4	creek	MAS	Mud	NO	YES	13.3333	12	Andrews Creek
TBM2007012214	0	0	0.2	18.7	8.1	13.7	9.9	creek	MAS	Mud	YES	YES	6.6667	12	Andrews Creek
TBM2007012215	4	1	0.4	18.6	8	12.5	9.4	creek	MAS	Mud	NO	YES	20	12	Andrews Creek
TBM2007012216	0	0	1	18.4	8	10.4	8.6	creek	MAS	Oyst/rock	YES	YES	46.6667	12	Andrews Creek
TBM2007022201	0	0	0.7	18.1	7.3	11.5	3.9	creek	MAS	Mud-sand	NO	YES	46.6667	44	Cockroach Creek
TBM2007022202	0	0	0.3	18.5	7.3	9.5	5.4	creek	MAS	Mud-sand	NO	YES	20	44	Cockroach Creek
TBM2007022203	0	0	0.5	18.8	7.3	10.3	4.9	creek	MAS	Mud-sand	NO	YES	33.3333	44	Cockroach Creek
TBM2007022204	0	0	0.2	18.9	7.2	12	4.6	creek	MAS	Mud	NO	YES	13.3333	44	Cockroach Creek
TBM2007022205	0	0	0.4	20.4	7.2	14.2	6.3	creek	MAS	Mud	NO	YES	26.6667	44	Cockroach Creek
TBM2007022206	0	0	0.3	20.5	7.3	14	5.2	creek	MAS	Mud	NO	NO	20	44	Cockroach Creek
TBM2007022207	0	0	0.3	20.6	7.3	13.1	5.9	creek	MAS	Mud	NO	YES	20	44	Cockroach Creek
TBM2007022208	0	0	0.2	20.6	7.1	14	6.2	creek	MAS	Mud	NO	YES	13.3333	44	Cockroach Creek
TBM2007022209	0	0	0.8	20.4	7.3	10.1	6.8	creek	MAS	Mud	NO	YES	53.3333	44	Cockroach Creek
TBM2007022210	0	0	0.4	20.5	7.2	11.8	6.4	creek	MAS	Mud	NO	YES	20	44	Cockroach Creek
TBM2007022211	0	0	0.2	21.7	8	24.5	7.9	creek	MAS	Mud	NO	YES	13.3333	44	Andrews Creek
TBM2007022212	2	1	1	21.4	8	24.6	7.7	creek	MAS	Mud	YES	YES	66.6667	44	Andrews Creek
TBM2007022213	0	0	0.6	20.5	8	18.8	7.5	creek	MAS	Mud	YES	YES	33.3333	44	Andrews Creek
TBM2007022214	0	0	0.4	20.8	8	19.7	7.1	creek	MAS	Mud	YES	NO	13.3333	44	Andrews Creek
TBM2007022215	0	0	0.3	20.9	8	16	7.8	creek	MAS	Mud	YES	YES	13.3333	44	Andrews Creek
TBM2007022216	0	0	0.3	20.9	8	20.4	7	creek	OTH	Mud	NO	NO	20	44	Andrews Creek
TBM2007032001	0	0	0.2	21.7	7.8	23.5	4.5	creek	MAS	Mud	NO	NO	13.3333	71	Andrews Creek
TBM2007032002	1	1	0.2	21.7	7.8	23.5	4.7	creek	MAS	Oyst/rock	YES	NO	13.3333	71	Andrews Creek
TBM2007032003	1	1	0.3	22.2	7.9	23.3	4.9	creek	MAS	Mud-sand	NO	YES	20	71	Andrews Creek
TBM2007032004	0	0	0.3	22.8	7.6	23.2	4.1	creek	HAS	Mud	YES	NO	13.3333	71	Andrews Creek
TBM2007032005	1	1	0.4	22.8	7.8	22.8	5.9	creek	MAS	Mud	NO	YES	26.6667	71	Andrews Creek
TBM2007032006	0	0	0.2	22.6	7.9	21.3	6.6	creek	MAS	Mud	NO	YES	13.3333	71	Andrews Creek
TBM2007032007	0	0	0.7	24.2	7.8	27.4	6.9	creek	MAS	Mud-sand	NO	YES	40	71	Cockroach Creek
TBM2007032008	0	0	0.3	24.3	7.8	27.6	6.4	creek	MAS	Mud-sand	NO	NO	13.3333	71	Cockroach Creek
TBM2007032009	0	0	0.2	24.4	7.7	24.9	6	creek	MAS	Mud-sand	NO	YES	13.3333	71	Cockroach Creek
TBM2007032010	0	0	0.6	24.7	7.8	27	6.4	creek	MAS	Mud-sand	NO	YES	33.3333	71	Cockroach Creek
TBM2007032011	0	0	0.2	25.4	7.6	22.7	5.6	creek	MAS	Mud	NO	YES	13.3333	71	Cockroach Creek
TBM2007032012	0	0	0.7	25.7	7.7	25.1	5.9	creek	MAS	Mud-sand	YES	YES	6.6667	71	Cockroach Creek
TBM2007032013	0	0	0.4	25.7	7.4	23.7	4.6	creek	MAS	Mud-sand	NO	YES	26.6667	71	Cockroach Creek
TBM2007032014	0	0	0.4	25.4	7.2	22.7	3.3	creek	MAS	Mud-sand	NO	YES	20	71	Cockroach Creek
TBM2007032015	0	0	1	24.9	7.2	18.6	3	creek	MAS	Mud-sand	YES	YES	40	71	Cockroach Creek
TBM2007032016	0	0	0.2	25.2	7.2	19.7	2.3	creek	MAS	Mud	NO	YES	13.3333	71	Cockroach Creek
TBM2007042101	0	0	0.5	20.7	7.4	0.9	6	creek	MAS	Mud	YES	YES	6.6667	102	Cockroach Creek
TBM2007042102	0	0	0.3	20.9	7.2	1	6.1	creek	MAS	Oyst/rock	YES	YES	6.6667	102	Cockroach Creek
TBM2007042103	1	1	0.6	20.9	7.2	0.9	6	creek	MAS	Oyst/rock	YES	YES	6.6667	102	Cockroach Creek
TBM2007042104	0	0	0.3	21.3	7.3	1	6.7	creek	MAS	Mud-sand	NO	YES	6.6667	102	Cockroach Creek
TBM2007042105	0	0	0.7	20.8	7.2	0.7	6.1	creek	MAS	Mud	NO	YES	46.6667	102	Cockroach Creek
TBM2007042106	0	0	1	20.8	7.1	0.6	6	creek	MAS	Mud	NO	YES	0	102	Cockroach Creek
TBM2007042107	0	0	0.4	20.8	7.1	0.5	6	creek	MAS	Mud	YES	YES	20	102	Cockroach Creek
TBM2007042108	0	0	0.5	20.9	7.2	0.5	6.1	creek	MAS	Mud	YES	YES	20	102	Cockroach Creek
TBM2007042109	0	0	0.7	20.9	7.1	0.4	6	creek	MAS	Mud	YES	YES	40	102	Cockroach Creek
TBM2007042110	0	0	1	21	7.1	0.4	6	creek	MAS	Mud	YES	YES	0	102	Cockroach Creek
TBM2007042111	0	0	0.5	24.3	7.5	8.7	6.4	creek	MAS	Mud-sand	YES	YES	6.6667	102	Andrews Creek
TBM2007042112	0	0	0.4	25.3	7.8	6.3	7.7	creek	MAS	Mud	YES	YES	13.3333	102	Andrews Creek
TBM2007042113	0	0	0.3	25.1	7.8	6.5	7.1	creek	MAS	Mud	YES	YES	0	102	Andrews Creek
TBM2007042114	0	0	0.5	24.5	7.7	6.4	6.3	creek	MAS	Mud	YES	YES	20	102	Andrews Creek
TBM2007042115	0	0	0.4	24.9	7.8	7.3	7.1	creek	MAS	Mud	YES	YES	26.6667	102	Andrews Creek
TBM2007042116	0	0	0.7	26	7.7	11.2	6.8	creek	MAS	Mud-sand	YES	YES	13.3333	102	Andrews Creek
TBM2007052001	0	0	0.2	23	7.6	30.3	3.5	creek	MAS	Mud	YES	YES	6.6667	130	Cockroach Creek
TBM2007052002	0	0	0.5	22.6	7.6	29.1	3.4	creek	MAS	Mud	YES	YES	13.3333	130	Cockroach Creek
TBM2007052003	0	0	0.7	22.7	7.5	28.5	3.1	creek	MAS	Oyst/rock	YES	YES	13.3333	130	Cockroach Creek
TBM2007052004	0	0	0.5	22.8	7.4	20.6	4.3	creek	MAS	Mud	YES	YES	6.6667	130	Cockroach Creek
TBM2007052005	0	0	0.2	23.1	7.3	26.6	3.3	creek	MAS	Mud	YES	YES	6.6667	130	Cockroach Creek
TBM2007052006	0	0	0.4	23.4	7.2	28.1	2.9	creek	MAS	Mud	YES	YES	13.3333	130	Cockroach Creek
TBM2007052007	0	0	0.8	23	7.2	20.8	3.1	creek	MAS	Mud	YES	YES	46.6667	130	Cockroach Creek
TBM2007052008	0	0	0.7	23.1	7.2	17.9	3.1	creek	MAS	Mud	YES	YES	26.6667	130	Cockroach Creek
TBM2007052009	0	0	0.8	23	7.2	17.8	3.3	creek	MAS	Mud	YES	YES	46.6667	130	Cockroach Creek
TBM2007052010	0	0	1	22.9	7.2	18.9	3.4	creek	MAS	Mud	YES	YES	13.3333	130	Cockroach Creek
TBM2007052011	0	0	0.8	24.4	7.7	30.6	4.3	creek	MAS	Mud-sand	YES	YES	20	130	Andrews Creek
TBM2007052012	0	0	0.7	24.7	7.7	30.7	4.4	creek	MAS	Oyst/rock	YES	YES	20	130	Andrews Creek
TBM2007052013	0	0	0.8	24.7	7.7	30.7	4.4	creek	MAS	Mud-sand	YES	YES	6.6667	130	Andrews Creek
TBM2007052014	0	0	0.6	24.8	7.7	30.7	4.7	creek	MAS	Mud-sand	YES	YES	13.3333	130	Andrews Creek
TBM2007052015	0	0	0.5	25.1	7.7	30.6	4	creek	MAS	Mud	YES	YES	6.6667	130	Andrews Creek
TBM2007052016	0	0	0.4	25.2	7.7	30.6	4.1	creek	MAS	Mud	YES	YES	13.3333	130	Andrews Creek
TBM2007062001	0	0	0.7	25.8	7.5	28.8	2	creek	MAS	Oyst/rock	YES	YES	46.6667	158	Cockroach Creek
TBM2007062002	0	0	0.4	25.7	7.4	28.6	1.7	creek	MAS	Mud-sand	YES	YES	13.3333	158	Cockroach Creek
TBM2007062003	0	0	0.3	25.5	7.4	28.2	1.5	creek	MAS	Oyst/rock	YES	YES	6.6667	158	Cockroach Creek
TBM2007062004	0	0	0.8	25.5	7.4	27.6	1.3	creek	MAS	Mud	YES	YES	20	158	Cockroach Creek
TBM2007062005	0	0	0.4	25.4	7.2	24.4	0.4	creek	MAS	Mud	YES	YES	6.6667	158	Cockroach Creek
TBM2007062006	0	0	0.5	25.7	7.2	26.1	0.3	creek	MAS	Mud	YES	YES	20	158	Cockroach Creek
TBM2007062007	0	0	0.5	25.6	7.1	21.9	0.3	creek	MAS	Mud	YES	YES	13.3333	158	Cockroach Creek
TBM2007062008	0	0	0.4	25.8	7.1	18.8	0.3	creek	MAS	Mud	YES	YES	20	158	Cockroach Creek
TBM2007062009	0	0	0.4	24.4	7	22.5	0.6	creek	MAS	Mud	YES	YES	13.3333	158	Cockroach Creek
TBM2007062010	0	0	0.4	25.3	7	17.8	2.6	creek	MAS	Mud	YES	YES	13.3333	158	Cockroach Creek
TBM2007062011	0	0	0.6	28.5	7.6	28.4	3.3	creek	MAS	Mud-sand	YES	YES	0	158	Andrews Creek
TBM2007062012	0	0	0.5	28.8	7.5	28.2	3.4	creek	MAS	Oyst/rock	YES	YES	33.3333	158	Andrews Creek
TBM2007062013	0	0	1	28.4	7.5	24.5	3.1	creek	MAS	Oyst/rock	YES	YES	66.6667	158	Andrews Creek
TBM2007062014	0	0	0.5	28.2	7.5	24.7	3.1	creek	MAS	Sand	YES	YES	20	158	Andrews Creek
TBM2007062015	0	0	0.3	29	7.7	25.5	3.6	creek	MAS	Mud	YES	YES	6.6667	158	Andrews Creek
TBM2007062016	0	0	0.4	29.3	7.5	25.7	3.4	creek	MAS	Mud	YES	YES	13.3333	158	Andrews Creek
TBM2007072201	0	0	1	29.7	7.4	33	1.9	creek	MAS	Oyst/rock	YES	YES	26.6667	187	Cockroach Creek
TBM2007072202	0	0	1	29.6	7.4	32.9	1.9	creek	MAS	Mud	YES	YES	60	187	Cockroach Creek
TBM2007072203	0	0	0.8	29.5	7.3	32.7	1.3	creek	MAS	Mud-sand	YES	YES	20	187	Cockroach Creek
TBM2007072204	0	0	0.4	29.5	7.2	31.9	1.2	creek	MAS	Mud-sand	YES	YES	6.6667	187	Cockroach Creek
TBM2007072205	0	0	0.4	29.6	7.1	31.7	1.2	creek	MAS	Mud-sand	YES	YES	6.6667	187	Cockroach Creek
TBM2007072206	0	0	1	29.6	7.1	31.7	1.2	creek	MAS	Oyst/rock	YES	YES	0	187	Cockroach Creek
TBM2007072207	0	0	0.3	29.7	7	31.3	1.1	creek	MAS	Mud	YES	YES	0	187	Cockroach Creek
TBM2007072208	1	1	0.4	29.6	7	26.4	1.2	creek	MAS	Mud	YES	YES	0	187	Cockroach Creek
TBM2007072209	0	0	0.7	29.7	6.9	28.6	1.3	creek	MAS	Mud	YES	YES	20	187	Cockroach Creek
TBM2007072210	0	0	1.2	29.1	6.8	25.9	1.3	creek	MAS	Mud	YES	YES	6.6667	187	Cockroach Creek
TBM2007072211	0	0	0.9	30.6	7.5	32.7	2.9	creek	MAS	Mud-sand	YES	YES	33.3333	187	Andrews Creek
TBM2007072212	0	0	0.4	30.7	7.5	32.8	2.9	creek	MAS	Mud	YES	YES	20	187	Andrews Creek
TBM2007072213	0	0	0.8	30.8	7.5	29.9	2.9	creek	MAS	Mud	YES	YES	46.6667	187	Andrews Creek
TBM2007072214	0	0	0.5	30.9	7.5	29.6	3.1	creek	MAS	Mud	YES	YES	20	187	Andrews Creek
TBM2007072215	0	0	0.6	31.1	7.5	29.3	3.4	creek	MAS	Mud	YES	YES	13.3333	187	Andrews Creek
TBM2007072216	0	0	0.3	31	7.5	27.7	3.5	creek	SHT	Mud	NO	YES	13.3333	187	Andrews Creek
TBM2007082101	0	0	0.3	27.3	7.2	11.4	2.5	creek	MAS	Mud	YES	YES	13.3333	227	Cockroach Creek
TBM2007082102	0	0	0.6	26.9	7.3	7.9	2.4	creek	MAS	Oyst/rock	YES	YES	33.3333	227	Cockroach Creek
TBM2007082103	0	0	0.5	27.1	7.3	5.4	2.7	creek	MAS	Oyst/rock	YES	YES	26.6667	227	Cockroach Creek
TBM2007082104	0	0	0.4	27.1	7.4	3.3	3.7	creek	MAS	Mud	YES	YES	20	227	Cockroach Creek
TBM2007082105	0	0	0.3	27.5	7.4	3.5	3.7	creek	MAS	Mud	NO	YES	20	227	Cockroach Creek
TBM2007082106	0	0	0.5	27.1	7.4	3	3.8	creek	MAS	Mud	NO	YES	26.6667	227	Cockroach Creek
TBM2007082107	0	0	0.4	27.2	7.4	3.3	3.4	creek	MAS	Mud	YES	YES	13.3333	227	Cockroach Creek
TBM2007082108	0	0	0.4	27.2	7.4	2.2	3.9	creek	MAS	Mud	YES	YES	20	227	Cockroach Creek
TBM2007082109	0	0	0.6	27	7.5	1.8	4.2	creek	MAS	Mud	YES	YES	33.3333	227	Cockroach Creek
TBM2007082110	0	0	0.5	27.2	7.4	2	3.9	creek	MAS	Mud	YES	YES	20	227	Cockroach Creek
TBM2007082111	0	0	0.5	31.1	7.8	21.4	3	creek	MAS	Mud-sand	YES	YES	13.3333	227	Andrews Creek
TBM2007082112	0	0	0.5	31.3	7.8	22.4	3.5	creek	MAS	Mud	YES	YES	13.3333	227	Andrews Creek
TBM2007082113	0	0	0.5	31.3	7.8	21.3	3.4	creek	MAS	Mud	YES	YES	13.3333	227	Andrews Creek
TBM2007082114	0	0	0.5	31.7	7.9	21.1	4.2	creek	MAS	Unknown	NO	YES	13.3333	227	Andrews Creek
TBM2007082115	0	0	0.5	32.3	8	20.8	5.6	creek	MAS	Mud	YES	YES	26.6667	227	Andrews Creek
TBM2007082116	0	0	0.6	32	8	21.4	5.2	creek	MAS	Mud	YES	YES	20	227	Andrews Creek
TBM2007092301	0	0	1	27.1	7.3	31.6	2.4	creek	MAS	Mud-sand	YES	YES	53.3333	256	Cockroach Creek
TBM2007092302	0	0	0.8	27.1	7.2	31.3	1.3	creek	MAS	Mud	YES	YES	33.3333	256	Cockroach Creek
TBM2007092303	0	0	0.7	27.5	7.1	31.2	1.2	creek	MAS	Mud	YES	YES	20	256	Cockroach Creek
TBM2007092304	1	1	0.4	28.1	7	29.1	0.5	creek	MAS	Mud	YES	YES	20	256	Cockroach Creek
TBM2007092305	6	1	0.5	27.9	7	28.3	1.2	creek	MAS	Mud	YES	YES	26.6667	256	Cockroach Creek
TBM2007092306	2	1	0.4	27.8	7	24.1	0.9	creek	MAS	Mud	YES	YES	20	256	Cockroach Creek
TBM2007092307	1	1	0.8	27.7	7	22.7	0.6	creek	MAS	Mud	NO	YES	53.3333	256	Cockroach Creek
TBM2007092308	3	1	0.3	28.9	7	28.5	0.9	creek	MAS	Mud	NO	NO	20	256	Cockroach Creek
TBM2007092309	2	1	0.4	28.9	7	29.3	1	creek	MAS	Mud	YES	YES	20	256	Cockroach Creek
TBM2007092310	0	0	0.4	28.6	7	29	0.7	creek	MAS	Mud	YES	YES	13.3333	256	Cockroach Creek
TBM2007092311	0	0	0.7	30.1	7.9	32.2	5.4	creek	MAS	Mud	YES	YES	26.6667	256	Andrews Creek
TBM2007092312	0	0	0.3	30.2	7.9	32.3	5.3	creek	MAS	Mud	YES	YES	13.3333	256	Andrews Creek
TBM2007092313	0	0	0.6	30.5	8	32.3	6.3	creek	MAS	Mud	NO	YES	40	256	Andrews Creek
TBM2007092314	0	0	0.3	30.7	8	32.3	6.8	creek	MAS	Mud	YES	YES	13.3333	256	Andrews Creek
TBM2007092315	0	0	0.6	30.8	8.1	32.3	6.7	creek	MAS	Mud	YES	YES	33.3333	256	Andrews Creek
TBM2007092316	0	0	0.8	31.2	8.1	32.3	7.3	creek	MAS	Mud	YES	YES	33.3333	256	Andrews Creek
TBM2007102301	0	0	0.2	25.3	7.1	17.2	1.7	creek	MAS	Mud	YES	YES	0	284	Cockroach Creek
TBM2007102302	0	0	0.4	25.4	7.1	17.4	1.7	creek	MAS	Mud	YES	YES	6.6667	284	Cockroach Creek
TBM2007102303	0	0	0.5	25.3	7.1	16.8	1.8	creek	OTH	Mud	YES	NO	26.6667	284	Cockroach Creek
TBM2007102304	0	0	0.6	25.4	7.1	14.2	2.2	creek	MAS	Mud	NO	YES	26.6667	284	Cockroach Creek
TBM2007102305	0	0	0.4	25.2	7.1	18.4	1.7	creek	MAS	Mud	NO	YES	26.6667	284	Cockroach Creek
TBM2007102306	0	0	0.3	25.5	7.1	13.1	1.8	creek	MAS	Mud	YES	YES	6.6667	284	Cockroach Creek
TBM2007102307	0	0	0.3	26	7.1	13	2	creek	MAS	Mud	NO	YES	20	284	Cockroach Creek
TBM2007102308	1	1	0.4	26.2	7.1	14.9	0.7	creek	MAS	Mud	YES	YES	6.6667	284	Cockroach Creek
TBM2007102309	0	0	0.4	26.3	7.2	11.8	1.9	creek	MAS	Mud	YES	YES	20	284	Cockroach Creek
TBM2007102310	0	0	0.4	27.2	7	12.1	1.5	creek	MAS	Mud	YES	YES	13.3333	284	Cockroach Creek
TBM2007102311	0	0	1	28.2	7.7	24	3.2	creek	MAS	Mud	YES	YES	46.6667	284	Andrews Creek
TBM2007102312	0	0	0.6	28.6	7.8	24.1	3.8	creek	MAS	Mud	YES	YES	26.6667	284	Andrews Creek
TBM2007102313	0	0	0.7	28.7	7.7	23.9	3.6	creek	MAS	Mud	YES	YES	26.6667	284	Andrews Creek
TBM2007102314	0	0	0.7	29.6	7.8	24.2	5	creek	MAS	Mud	YES	YES	20	284	Andrews Creek
TBM2007102315	0	0	0.4	29.8	7.7	24.2	5	creek	MAS	Mud	YES	YES	0	284	Andrews Creek
TBM2007102316	0	0	0.6	30.3	7.8	24.4	6	creek	MAS	Mud	YES	YES	20	284	Andrews Creek
TBM2007112001	0	0	0.7	19.6	7.8	23.1	3.9	creek	MAS	Mud	YES	YES	20	309	Andrews Creek
TBM2007112002	0	0	0.8	19.8	7.7	23.9	4	creek	MAS	Mud	YES	YES	26.6667	309	Andrews Creek
TBM2007112003	0	0	1	19.7	7.7	23	4	creek	MAS	Mud-sand	YES	YES	46.6667	309	Andrews Creek
TBM2007112004	0	0	0.6	20	7.8	21.9	4.3	creek	HAS	Mud	YES	YES	20	309	Andrews Creek
TBM2007112005	0	0	0.5	19.4	7.8	22.2	4.8	creek	MAS	Mud-sand	YES	YES	13.3333	309	Andrews Creek
TBM2007112006	0	0	0.6	20.3	7.8	22.4	4.8	creek	MAS	Mud	YES	YES	20	309	Andrews Creek
TBM2007112007	0	0	0.9	20.9	8.1	26.4	6.2	creek	MAS	Mud-sand	YES	YES	0	309	Cockroach Creek
TBM2007112008	0	0	0.6	20.9	8.1	26.4	6.2	creek	MAS	Mud-sand	YES	YES	13.3333	309	Cockroach Creek
TBM2007112009	0	0	0.8	21	8.1	26.2	6.2	creek	MAS	Mud-sand	YES	YES	20	309	Cockroach Creek
TBM2007112010	0	0	0.8	21	8.1	26.3	6.1	creek	MAS	Oyst/rock	YES	YES	20	309	Cockroach Creek
TBM2007112011	0	0	0.9	21.3	8	25.2	6	creek	MAS	Mud-sand	YES	YES	40	309	Cockroach Creek
TBM2007112012	0	0	0.6	21.1	7.9	24.9	5.3	creek	MAS	Mud-sand	YES	YES	6.6667	309	Cockroach Creek
TBM2007112013	0	0	0.6	21.1	7.8	24.5	4.8	creek	MAS	Mud-sand	YES	YES	13.3333	309	Cockroach Creek
TBM2007112014	0	0	0.7	21.6	7.7	23.8	4.3	creek	MAS	Sand	YES	YES	20	309	Cockroach Creek
TBM2007112015	0	0	1	21.1	7.4	16.8	3	creek	MAS	Sand	YES	YES	33.3333	309	Cockroach Creek
TBM2007112016	0	0	0.8	21.1	7.4	11.9	3.6	creek	MAS	Mud-sand	YES	YES	20	309	Cockroach Creek
TBM2007122201	1	1	0.5	19.3	7.5	20	7.8	creek	MAS	Mud	NO	YES	33.3333	338	Andrews Creek
TBM2007122202	1	1	0.3	19.3	7.6	20	6.4	creek	MAS	Mud	NO	YES	20	338	Andrews Creek
TBM2007122203	0	0	0.5	19.2	7.6	19.7	5.1	creek	MAS	Mud-sand	NO	YES	26.6667	338	Andrews Creek
TBM2007122204	0	0	0.3	19.4	7.6	19.6	5.3	creek	MAS	Mud	NO	YES	13.3333	338	Andrews Creek
TBM2007122205	0	0	0.4	19.1	7.6	17	7.8	creek	MAS	Mud	NO	YES	20	338	Andrews Creek
TBM2007122206	1	1	0.3	19.8	7.7	16.8	8.4	creek	MAS	Mud	NO	NO	20	338	Andrews Creek
TBM2007122207	0	0	0.4	21.6	7.9	28.2	12.2	creek	MAS	Mud	NO	NO	26.6667	338	Cockroach Creek
TBM2007122208	1	1	0.3	20.7	7.8	25.1	9.8	creek	MAS	Mud-sand	NO	YES	13.3333	338	Cockroach Creek
TBM2007122209	0	0	0.4	23.1	7.4	21.8	5.6	creek	MAS	Mud	NO	YES	26.6667	338	Cockroach Creek
TBM2007122210	1	1	0.4	23.2	7.3	21.4	6	creek	MAS	Mud	YES	YES	6.6667	338	Cockroach Creek
TBM2007122211	4	1	0.4	22.9	7.2	21.1	4.7	creek	MAS	Mud	NO	YES	26.6667	338	Cockroach Creek
TBM2007122212	0	0	0.7	21.6	7.2	17.3	4	creek	MAS	Mud	NO	YES	46.6667	338	Cockroach Creek
TBM2007122213	1	1	0.4	23.8	7.3	22.5	5.6	creek	MAS	Mud	NO	YES	13.3333	338	Cockroach Creek
TBM2007122214	0	0	0.4	23	7.5	23.3	6.7	creek	MAS	Mud	NO	NO	26.6667	338	Cockroach Creek
TBM2007122215	1	1	0.4	21.7	7.7	24.2	9	creek	MAS	Mud	YES	YES	13.3333	338	Cockroach Creek
TBM2007122216	0	0	0.4	22	8	28.7	10.6	creek	MAS	Mud	YES	YES	13.3333	338	Cockroach Creek

## Sheet: Metadata
Data used for Distribution, Spread, and Habitat Predictability of a Small, Invasive, Piscivorous Fish in an Important Estuarine Fish Nursery
Contact: Marin Greenwood, marin.greenwood@icf.com
1. Worksheet 'Presence-absence data (Fig. 1)' includes the data used to create Figure 1.
9.1-m and 21.3-m seines had 3.2-mm mesh and a center bag. 180-m seine had 38-mm mesh and a center bag.
'reference' is the reference code for a given sample in the Florida Fish and Wildlife Conservation Commission, Fish and Wildlife Research Institute Fisheries-Independent Monitoring Program's database. Please contact Tim MacDonald (tim.macdonald@myfwc.com) for additional data from these samples by providing the reference numbers of interest.
2. Worksheet 'Upstream spread data (Fig. 2)' includes the data used to create Figure 2 and to calculate the rate of upstream spread.
These data are a subset of those used for Figure 1, but include estimates of km upstream from the Little Manatee River mouth, for the analysis of spread rate (the mouth of the river was assumed to be latitude 27.716039°, longitude -82.484872).
Dates are included, as used in the calculation of upstream spread.
3. Worksheet 'BRT data' includes the data used for Boosted Regression Trees analyses.
These are the 935 samples used for the habitat predictability boosted regression trees analyses.
Variable	Definition
reference	Reference code for a given sample in the Florida Fish and Wildlife Conservation Commission, Fish and Wildlife Research Institute Fisheries-Independent Monitoring Program's database. Please contact Tim MacDonald (tim.macdonald@myfwc.com) for additional data from these samples by providing the reference numbers of interest.
B. belizanus abundance	Number of B. belizanus collected
B. belizanus presence	B. belizanus presence (1) or absence (0)
depth	Water depth (m) at the seine's bag, i.e., 1.5 m from shore
temperature	Water temperature (°C) at 0.2-m depth, taken at seine's bag
pH	pH at 0.2-m depth, taken at seine's bag
salinity	Salinity (Practical Salinity Scale) at 0.2-m depth, taken at seine's bag
DO	Dissolved oxygen (mg l-1) at 0.2-m depth, taken at seine's bag
waterbody type	Type of waterbody: creek (natural tributaries of larger rivers), canal (dredged inlets of larger rivers), bayou (large open embayment of a river), and river (mainstems of the two main rivers within the B. belizanus range, Alafia and Little Manatee)
shoreline	Dominant shoreline vegetation or structure at sampling site: EMM = emergent marsh (primarily black rush, Juncus roemarianus); MAS = mangrove (red mangrove, Rhizophora mangle, or black mangrove, Avicennia germinans); STV = small terrestrial vegetation (primarily leather fern, Acrostichum danaefolium); SHT = shrubs/trees; HAS = artificially hardened (e.g., sea wall or rip rap); OTH = other
bottom	Dominant bottom substrate from qualitative assessment: mud; mud-sand mix; sand; oyster/rock (Oyst/rock); or unknown.
inundation	Whether or not shoreline was inundated or not at the time of sampling
overhang	Whether or not there was vegetation overhanging the shoreline at the time of sampling
gradient	Site gradient from shoreline to offshore (%), calculated as the difference in water depth between the seine’s bag and the seine’s wing at the shore, divided by the distance between bag and shore, and expressed as a percentage
Julian day	Julian day of the year
waterbody name	Names of the 11 waterbodies sampled in 2006/2007
